# Supplementary material for: MGAS: a powerful tool for multivariate gene-based genome-wide association analysis
Source: PubMed Central journal article supplement (PMC4382905; doi:10.1093/bioinformatics/btu783), 2014-11-26
Supplement: supp_btu783_Supplement_BioInf_total_rev.pdf [file supp_btu783_Supplement_BioInf_total_rev.pdf]

## **Supplement**

MGAS: a powerful tool for multivariate gene-based genome-wide association analysis

Sophie van der Sluis<sup>1</sup>

Conor V. Dolan<sup>2</sup>

Jiang Li<sup>3</sup>

Youqiang Song<sup>3,7,8,9</sup>

Pak Sham<sup>6,7,8,9</sup>

Danielle Posthuma<sup>1,4,5</sup>

Miao-xin Li<sup>6,7,8,9\*</sup>

<sup>1</sup> Department of Complex Trait Genetics, VU Medical Center (VUmc), Center for Neurogenomics and Cognitive Research (CNCR), Neuroscience Campus Amsterdam, De Boelelaan 1085, 1081 HV Amsterdam, the Netherlands

<sup>2</sup> Department of Biological Psychology, VU University Amsterdam, Van der Boechorststraat 1, 1081 BT Amsterdam, The Netherlands

<sup>3</sup> Department of Biochemistry, the University of Hong Kong, Pokfulam, Hong Kong

<sup>4</sup> Department of Functional Genomics, Center for Neurogenomics and Cognitive Research (CNCR), Neuroscience Campus Amsterdam, VU University, Amsterdam, The Netherlands

<sup>5</sup> Department of Child and Adolescent Psychiatry, Erasmus MC-University Medical Centre Rotterdam, Sophia Hospital Rotterdam, The Netherlands

<sup>6</sup> Department of Psychiatry, the University of Hong Kong, Pokfulam, Hong Kong

<sup>7</sup> State Key Laboratory for Cognitive and Brain Sciences, the University of Hong Kong, Pokfulam, Hong Kong

<sup>8</sup> The Centre for Reproduction, Development and Growth, the University of Hong Kong, Pokfulam, Hong Kong

<sup>9</sup> The Centre for Genomic Sciences, the University of Hong Kong, Pokfulam, Hong Kong

\*Correspondence should be addressed to Miao-Xin Li (Tel: +852-2831 5105; E-mail: mxli@hku.hk)

**Content**

|                                      |                                                                                                                                                                                                                                                                   |     |
|--------------------------------------|-------------------------------------------------------------------------------------------------------------------------------------------------------------------------------------------------------------------------------------------------------------------|-----|
| Supplemental Information Simulations |                                                                                                                                                                                                                                                                   | p3  |
| Figure S1:                           | The relationship between $r^*p$ (i.e., correlations between genotypes $r$ and correlations between phenotypes $p$ : x-axis) and correlations between p-values (y-axis)                                                                                            | p8  |
| Figure S2:                           | Example QQplots of 4 whole-genome multivariate gene-based Type I error rate simulations in which real genome-wide genetic data were used and simulated phenotypes with a correlational structure similar to that of the NFBC1966 metabolic phenotypes (Table S8). | p9  |
| Figure S3:                           | QQplot of the original p-values (provided by the authors (Sabatti et al) and available in the dbGaP data base) per phenotype.                                                                                                                                     | p10 |
| Figure S4:                           | QQplot of the univariate SNP-based p-values (combined across all phenotypes), subdivided in all SNPs (green), SNPs in genes (orange), and SNPs outside genes (pink). The multivariate gene-based p-values calculated by MGAS are printed in blue.                 | p11 |
| Table S1a:                           | Visual representation of the LD patterns used for the simulations including small genes (10 SNPs)                                                                                                                                                                 | p12 |
| Table S1b:                           | Visual representation of the LD patterns used for the simulations including small genes (10 SNPs)                                                                                                                                                                 | p13 |
| Table S1c:                           | Visual representation of the LD patterns used for the simulations including large genes (60 SNPs)                                                                                                                                                                 | p14 |
| Table S1d:                           | Visual representation of the LD patterns used for the simulations including large genes (60 SNPs)                                                                                                                                                                 | p15 |
| Table S1e:                           | Visual representation of the LD patterns used for the simulations including large genes (60 SNPs)                                                                                                                                                                 | p16 |
| Table S2:                            | 1 factor model, gene-effect on factor                                                                                                                                                                                                                             | p17 |
| Table S3:                            | 1 factor model, gene-effect specific to one phenotype                                                                                                                                                                                                             | p18 |
| Table S4:                            | 4 factor model, gene-effect on one of the four factors                                                                                                                                                                                                            | p19 |
| Table S5:                            | 4 factor model, gene-effect specific to one phenotype                                                                                                                                                                                                             | p20 |
| Table S6:                            | Network model mimicking 1-factor model (i.e., all phenotypes equally strongly related), gene-effect specific to one phenotype                                                                                                                                     | p21 |
| Table S7:                            | Network model mimicking 4-factor model (i.e., clusters of phenotypes), gene-effect specific to one phenotype                                                                                                                                                      | p22 |
| Table S8:                            | Phenotypic correlations between 9 metabolic traits, corrected for sex, oral contraceptive use and pregnancy                                                                                                                                                       | p23 |
| Table S9:                            | List of FDR corrected genes/genetic regions identified by MGAS in the metabolic data                                                                                                                                                                              |     |
| Table S10:                           | Annotation of the genes/genetic regions identified by MGAS by reference to the Catalog of Published Genome-wide Association Studies ( <a href="http://www.genome.gov/gwastudies/">http://www.genome.gov/gwastudies/</a> )                                         |     |
| Table S11:                           | Genome-wide significant SNPs identified by TATES using the 9 continuous metabolic phenotypes                                                                                                                                                                      |     |
| Table S12:                           | Genome-wide significant genes identified by GATES on a) the univariate sum score of five metabolic syndrome risk factors and b) the individual five dichotomous metabolic risk factors                                                                            |     |
| Table S13:                           | Genome-wide significant genes identified by GATES on the 9 continuous metabolic phenotypes separately                                                                                                                                                             |     |
| Table S14:                           | Comparison results MGAS, TATES, and GATES when all analyses are conducted on the original 9 continuous metabolic phenotypes                                                                                                                                       |     |

## Simulations

### General

All simulations (results shown in Figure 2 and Supplementary Tables S2-S7) concerned  $N=2000$  unrelated subjects and 20 standard normally distributed phenotypes. Simulated genes, covering 10 or 60 SNPs all with  $MAF=.2$ , explained 0, .5% or 1% of the variance, either on the latent level, or in a specific phenotype (see below). All simulations were repeated  $N_{rep}=2000$  times.

Note that the standard error of the ML estimator of the p-value equals  $SE=\sqrt{(p*(1-p))/N_{sim}}$ , where  $p$  denotes the percentage of significant tests observed in the simulations (nominal p-value) given the chosen  $\alpha$ . The 95% confidence interval for an unbiased nominal p-value when the gene-effect is actually zero (i.e., given  $\alpha=.05$ , we expect  $p\approx.05$ ) corresponds to  $CI_{95}=(p-1.96*SE, p+1.96*SE)$ . Given  $N_{rep}=2000$  and  $\alpha=.05$ ,  $CI_{95}$  thus equals .0409 - .0605, i.e., p-values  $< .04$  suggest that the **MGAS**-procedure is too conservative, while p-values  $> .06$  suggest that the **MGAS**-procedure is too liberal.

Simulations and analyses were conducted in *R* (R Development Core Team, 2011, version 2.13.0), and run on the Genetic Cluster Computer.

### Genetic data

Data were simulated for either a small gene (covering 10 SNPs) or a larger gene (covering 60 SNPs). All SNPs had minor allele frequency (MAF) of .20. Data were simulated such that within LD blocks,  $r=.9$  (i.e.,  $r^2=.81$ ), and between LD blocks,  $r=0$  (i.e., SNPs in different blocks did not correlate).

All genetic simulations settings are summarized in Table 1 of the main manuscript.

For the small gene, 10 scenarios were simulated, with different numbers of Disease Susceptibility Loci (DSL, i.e., a SNP that is causally related to one or more phenotypes):

1. all SNPs in 1 LD block with 0 DSL (to control Type I error rate);
2. all SNPs in 1 LD block, 1 DSL;
3. all SNPs in 1 LD block, 1 DSL with opposite effects\*;
4. all SNPs in 1 LD block, 2 DSL;
5. all SNPs in 1 LD block, 2 DSL with opposite effects\*\*;
6. all SNPs in 1 LD block, 4 DSL;
7. all SNPs in 1 LD block, 4 DSL with opposite effects\*\*;
8. SNPs divided over 2 LD blocks (5 SNPs each), 1 DSL in first block;
9. SNPs divided over 2 LD blocks (5 SNPs each), 1 DSL per block;
10. SNPs divided over 2 LD blocks (5 SNPs each), 1 DSL per block, opposite effects\*\*.

For the large gene, 4 scenarios were simulated. In each of these scenarios, the gene covered 8 LD blocks: 4 blocks of 10 SNPs each, and 4 blocks of 5 SNPs each.

1. 0 DSL (to control Type I error rate);
2. 1 DSL in a large block;
3. 8 DSL, 1 in each LD block;
4. 8 DSL, 1 in each block, opposite effects\*\*.

\* In factor models (Figure 1a,c), the one DSL affected half of the phenotypic indicators of a factor positively and the other half negatively. In unclustered networks (Figure 1e), the one DSL affected 1 phenotype positively and another phenotype in the network negatively. In clustered networks (Figure 1f), the one DSL affected either 2 phenotypes in the same cluster, or 2 phenotypes in different clusters, in opposite directions.

\*\* Half of the DSL in a gene conveyed a positive effect, the others a negative effect on the factors (Figure 1a,c) or phenotypes (Figure 1c,d,e,f).

See Supplemental Tables S1a-e for a visual representation of these LD settings.

Note that, assuming the same number of DSL with the same effect size, the power to detect a gene is negatively correlated to the size of the gene. Specifically, because the weight  $q_e$ , denoting the effective number of p-values (i.e., tests and thus the effective number of phenotypes + SNPs), will, given the same LD structure, invariably be higher for larger genes, the weight  $q_e/q_{ej}$  will also be higher. As a consequence, p-values of DSL with the same effect size will be multiplied by a larger weight when these DSL are located in a larger gene. That is, a stronger genetic signal is required to implicate a large gene. To obtain illustrative power results, we therefore chose to simulate the data such that the DSL in small genes together explained .5% of the variance, and the DSL in large genes together explained 1% variance. As a consequence, power results as depicted in Figure 2 and reported in Tables S2-S7 are not directly comparable across genes of different size.

When a simulated gene included multiple DSL, the effect was evenly divided over the multiple DSL (e.g., in a large gene with 2 DSL, both DSL were simulated to explain  $1/2=.5\%$  variance). Important to note is that because of the strong LD between the SNPs within an LD block, SNPs that were simulated to not have an effect are related to the phenotype if one regresses the phenotype on that SNP because of that SNP's strong LD with the actual DSL(s) in the block (i.e., the regression coefficient  $\beta$  in that regression will be equal to the  $\beta$  of the actual DSL weighted by the LD measure

*r*). In addition, when multiple DSL are simulated within a block, the effect of every DSL is augmented in the simple regression of a phenotype on that DSL because of the DSL's correlation to other DSL in a block (i.e., the  $\beta$  in that regression is equal to the simulated  $\beta$  of that DSL plus the  $\beta$  of other DSL in the block weighted by the LD measure *r*). As a consequence, a) the variance explained by the entire gene (the  $R^2$  as calculated in e.g. multiple regression) was, given our simulation settings, larger for genes harbouring multiple DSL, and b) in the simple regression of a phenotype on a single DSL, the variance explained by the DSL was almost equal across scenarios 2, 3 and 4 of the small gene (i.e., when 1, 2 or 4 DSL resided in the same LD-block).

### Phenotypic data

#### *Phenotypic factor models*

With *m* phenotypes and *k* common factors, phenotypic data were simulated according to the following model:

$$\Sigma = \Lambda\Lambda^t + \Theta, \quad (4)$$

where  $\Sigma$  denotes the  $m \times m$  phenotypic variance-covariance matrix,  $\Lambda$  denotes the  $m \times k$  matrix of factor loadings (with  $^t$  denoting matrix transpose),  $\Psi$  denotes the  $k \times k$  covariance matrix between the *k* latent factors, and  $\Theta$  denotes the diagonal  $m \times m$  matrix of residual variances (i.e., the part of the phenotypic variances that is not explained by any of the *k* factors). In models with  $k > 1$ , simple structure was maintained (i.e., all phenotypes loaded on only 1 latent factor).

Data were generated for models featuring either 1 or 4 factors. In the 1-factor models, factor loadings were set to .75, such that the latent factor explained  $.75^2 = .56$  % of the variance in each phenotype, and residual variances were equal to  $1 - .75^2 = .44$ . Consequently, all intercorrelations between the 20 standard normally distributed phenotypes were .56. In the 1-factor model, all SNPs within a gene were either modelled to affect the latent factor (and through the latent factor all 20 phenotypes underlying the factor), or to affect one of the 20 phenotypes directly (see Figures 1a and 1b, respectively).

Note that when 1) all phenotypic intercorrelations are explained by 1 latent factor, 2) all phenotypes have equal factor loadings, and 3) all phenotypes have equal residual variances, the model is called a Rasch model (Rasch, 1980). Important to note is that *only* when the phenotypic data-generating model is a Rasch model *and* the effect of gene X is on the latent factor (i.e., Figure

1a), is the sum score calculated across all individual phenotypes a sufficient statistic for the genetic analysis of gene X, i.e., only then does the sum of scores on all phenotypes exhaustively summarize all phenotypic information that is relevant for the analysis testing the association with gene X. The sum score is, however, not a sufficient statistic for the genetic analysis when the genetic effect is directly on one of the phenotypes, or when the phenotypic Rasch model does not hold.

In the 4-factor models, 5 phenotypes were modelled per factors. All factor loadings were set to .75 within factors, all residual variances equalled  $1-.75^2=.44$ , and correlations between factors were set to .23. Consequently, correlations between phenotypes loading on the same factor equalled  $.75^2=.56$ , while correlations between phenotypes loading on different factors equalled  $.75*.23*.75=.13$ . Effects of all SNPs within a gene were either modelled on one of the four latent factors (and through that factor on all 5 phenotypes defining that factor), or directly on one of the phenotypes (see Figures 1c and 1d, respectively). Note that the phenotypic sum score is not a sufficient statistic for the genetic analysis when the phenotypic model is a 4-factor model.

#### *Phenotypic network models*

In all network simulations, we assumed the model to be stationary, i.e., the mutual interactions between the phenotypes have over time resulted in a stable variance-covariance matrix. Also, we assumed that all phenotypes were mutually related, i.e., in all regressions of the phenotypes on each other  $\beta_{ij} \neq 0$ . We did, however, not allow instantaneous self-activation, i.e., the phenotypes were not allowed to affect themselves on the next time point (i.e.,  $\beta_{ii}=0$ ). (Note, however, that indirect self-activation on subsequent time points was allowed, i.e., phenotype A affects phenotype B on time point  $t=1$ , and as all phenotypes were simulated to be mutually related, it affects itself *via* phenotype B on  $t=2$ ). Network data were simulated according to the model:

$$\Sigma = (\mathbf{I} - \mathbf{B})^{-1} \Psi (\mathbf{I} - \mathbf{B})^{-1} \mathbf{t}, \quad (5)$$

where  $\Sigma$  denotes the  $m \times m$  phenotypic variance-covariance matrix,  $\mathbf{I}$  is an  $m \times m$  identity matrix,  $\mathbf{B}$  is a full  $m \times m$  matrix including the regression weights  $\beta$  of all phenotypes on each other (i.e., element  $\mathbf{B}[i,j]$  includes the regression weight of phenotype  $i$  on phenotype  $j$ ). The diagonal of  $\mathbf{B}$  was fixed to zero to model absence of instantaneous self-activation.  $\Psi$  is the  $m \times m$  diagonal matrix containing the variances of all phenotypes conditional on the other phenotypes.

Note that in network models, in contrast to the factor models, phenotype-specific genetic effects propagate through the network to indirectly affect other connected phenotypes in the

network. In phenotypic network models, genes thus affect all connected phenotypes, with the size of the effect depending on the strength of the phenotypic relations (i.e., edges) in the network. In all network simulations, all SNPs within a gene affected only the first phenotype in the network, but because all phenotypes are connected, the genetic effects do spread through the network. Two types of networks were simulated. First, all regression weights in the B matrix were set to .04197, resulting in phenotypic intercorrelations among all 20 phenotypes of .56. That is, the phenotypic variance-covariance matrix of these network data is similar to the phenotypic variance-covariance matrices resulting from the 1-factor Rasch models discussed above. Second, a network was simulated with 4 clusters of phenotypes that correlated .56 within clusters, and .13 between clusters, resulting in a phenotypic variance-covariance matrix that is similar to that resulting from the 4-factor models discussed above. The network models are illustrated in Figures 1e and 1f, respectively).

It is important to note that network models and factor models can yield phenotypic data with very similar variance-covariance structure, in spite of the different underlying data-generating processes. As a consequence, even if the variance-covariance structure of data can be well described by a 1-factor model, this does not necessarily imply that the 1-factor model is the actual data-generating model. This is relevant for genetic studies, because factor analytic results are often used to justify the reduction of multivariate data to univariate composite scores (e.g., sum scores, factor scores). Such reduction is, however, only valid if the data-generating process is a 1-factor model, but not if the data are generated by a network process.

R Development Core Team (2011). R: A language and environment for statistical computing. R Foundation for Statistical Computing, Vienna, Austria. ISBN 3-900051-07-0, URL <http://www.R-project.org/>.

Rasch G (1980) Probabilistic models for some intelligence and attainment tests. Chicago: The University of Chicago Press.

Figure S1

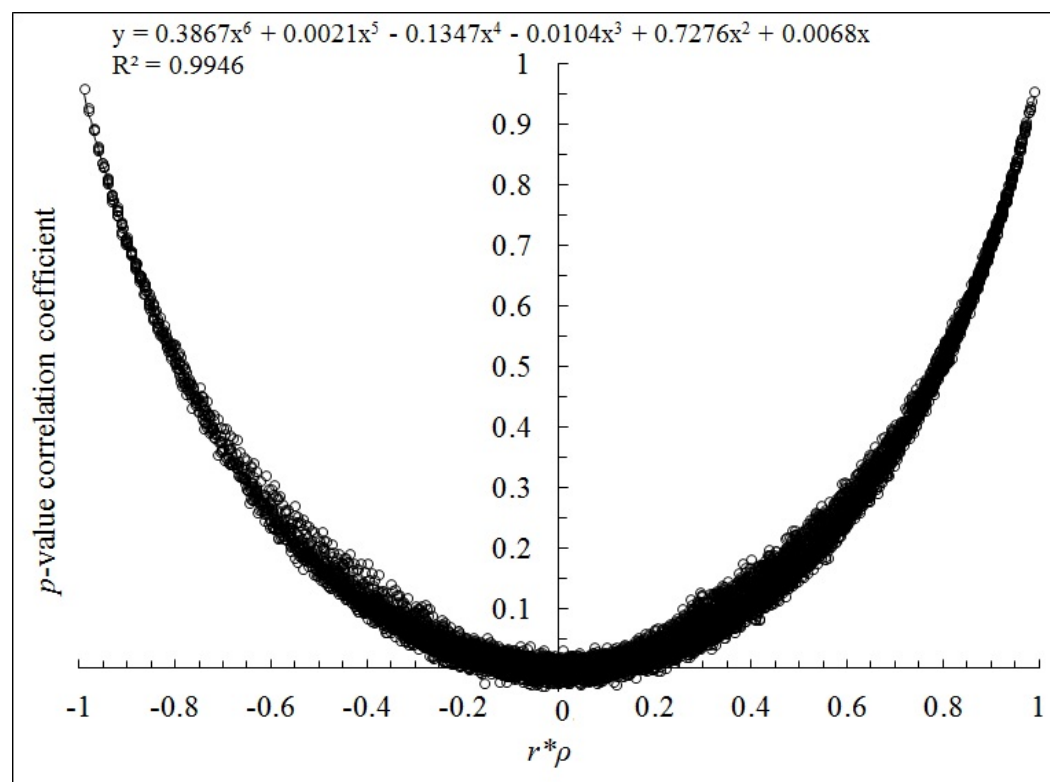

The relationship between  $r*\rho$  (i.e., correlations between genotypes  $r$  and correlations between phenotypes  $\rho$ : x-axis) and correlations between  $p$ -values (y-axis) obtained in the regression of a phenotype on a genetic variant. Simulations (see original manuscript §2.2 for details) show that this relationship can be accurately described by a 6<sup>th</sup> order polynomial (coefficient of determination  $R^2=.995$ ). Note that the data points produced for the quantitative and qualitative traits are mixed together to generate a unified approximate function. Note also that using the same 6<sup>th</sup> order polynomial, similarly high  $R^2$  values were obtained for different simulation settings. For instance, when the simulated sample size was only  $N=2000$ , the  $R^2$  was 0.998, and when 4 phenotypes and 4 SNPs were simulated in a sample of 4000 subjects, the  $R^2$  was 0.997.



Figure S2

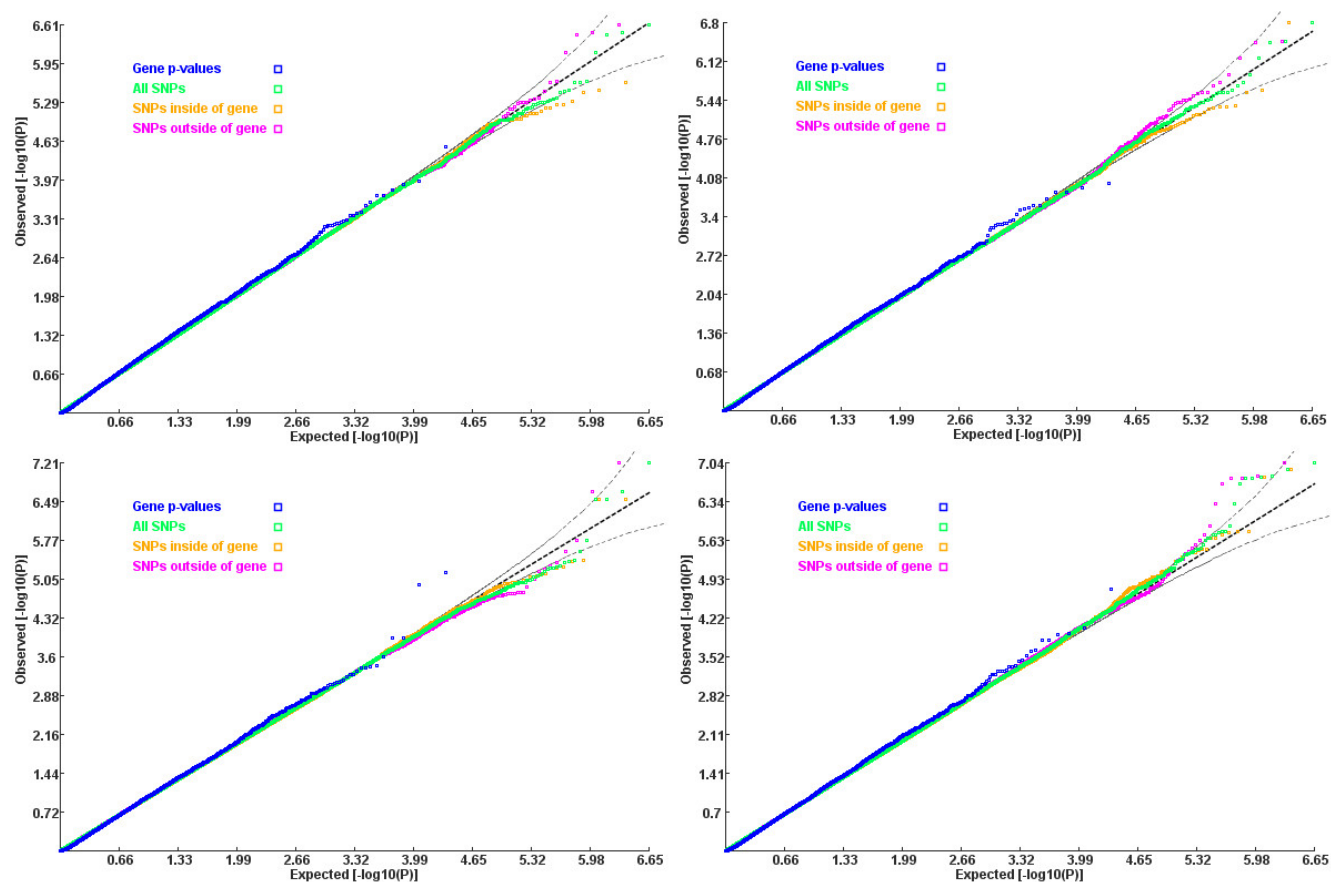

Example QQplots of 4 of the 10 whole-genome multivariate gene-based simulations in which we used real genome-wide genetic data of  $N=4,763$  subjects from the Northern Finland Birth Cohort (NFBC1966, Sabatti *et al.*, 2009), and simulated 10 sets of 9 phenotypes, of which the correlational structure mimicked the observed correlations of the NFBC1966 metabolic phenotypes (see Supplemental Table S8), to check whether MGAS Type I error rates were correct regardless of LD pattern and gene size. Plotted are the univariate SNP-based p-values (i.e., p-values of all 9 phenotypes in one plot), subdivided in all SNPs (green), SNPs in genes (orange), and SNPs outside genes (pink). The multivariate gene-based p-values (blue) are calculated through the MGAS procedure and are assembled from the SNPs located within genes only.

Figure S3

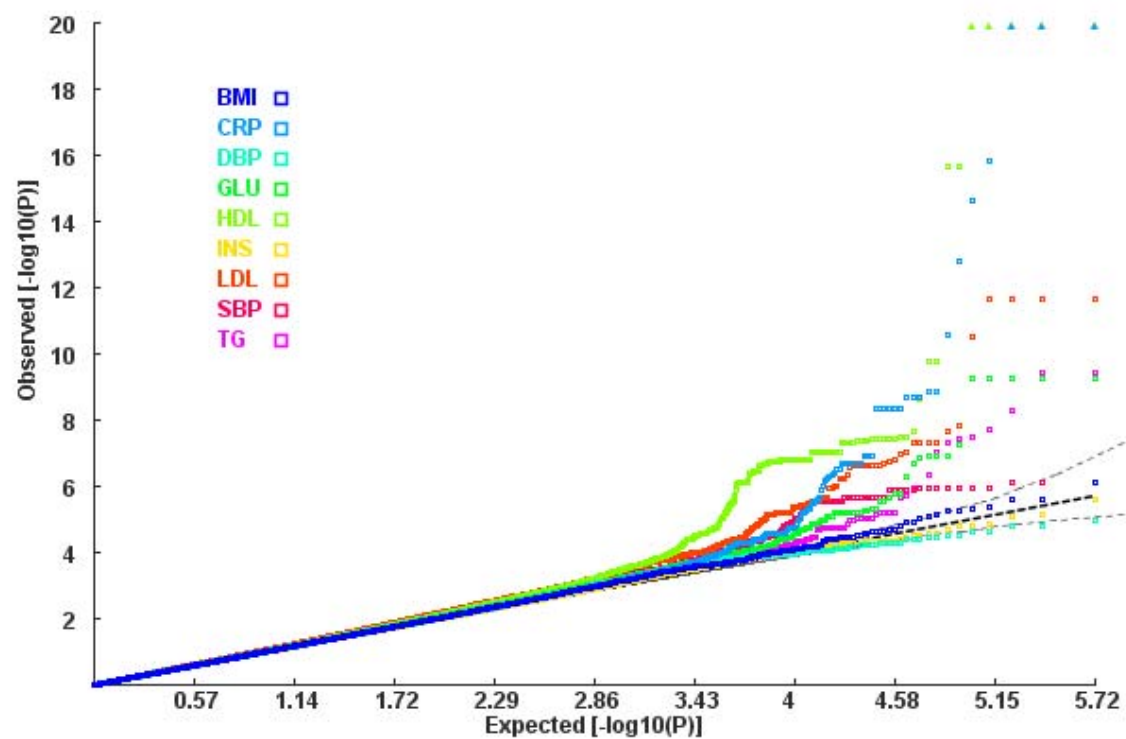

QQplot of the original p-values per phenotype obtained in covariate and PC corrected analyses, available in the dbGaP data base as provided by the original authors:

Sabatti, C., Service, S.K., Hartikainen, A-L, Pouta, A., Ripatti, S., Brodsky, J., et al. Genome-wide association analysis of metabolic traits in a birth cohort from a founder population. *Nat. Genet.*, 41, 35-46 (2009).

Figure S4

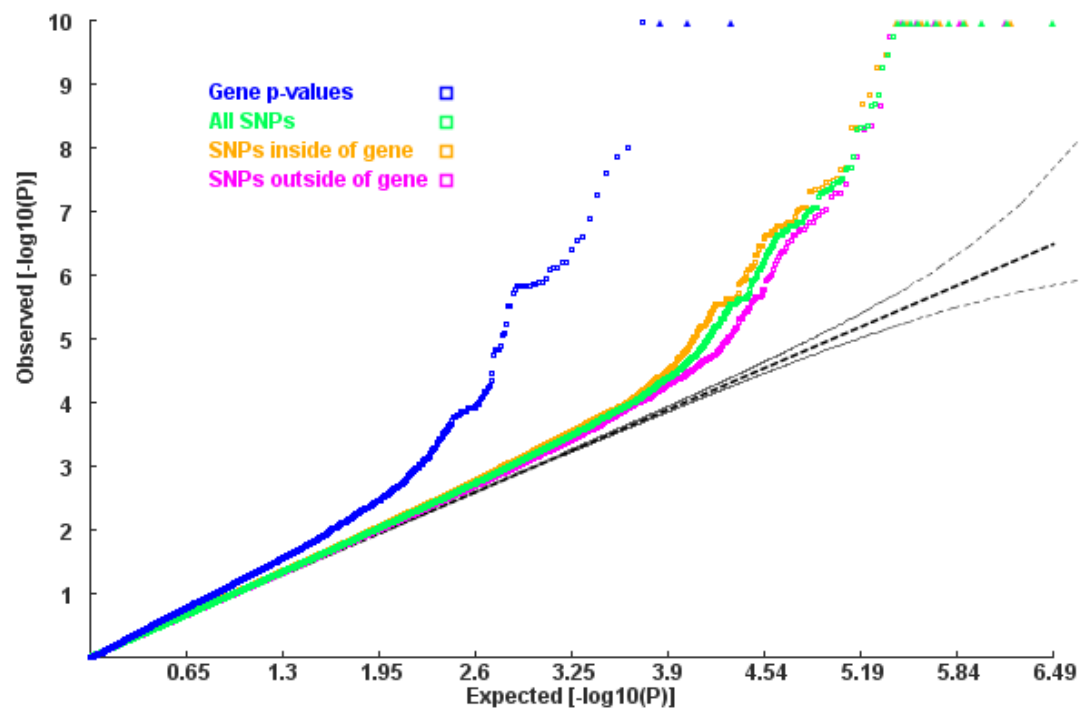

QQplot of the univariate SNP-based p-values (i.e., p-values of all 9 phenotypes in one plot), subdivided in all SNPs (green), SNPs in genes (orange), and SNPs outside genes (pink). The multivariate gene-based p-values (blue) are calculated through the MGAS procedure and are assembled from the SNPs located within genes only: the enrichment of association signals in the multivariate gene-based p-values is due to the selection of smallest weighted p-values by MGAS.



| Table S1b<br>Visual representation of the LD patterns used for the simulations including small genes (10 SNPs) |                |    |    |    |    |        |    |    |                |    |        |    |    |                |    |    |    |    |    |    |
|----------------------------------------------------------------------------------------------------------------|----------------|----|----|----|----|--------|----|----|----------------|----|--------|----|----|----------------|----|----|----|----|----|----|
|                                                                                                                | Gene 4         |    |    |    |    | Gene 5 |    |    |                |    | Gene 6 |    |    |                |    |    |    |    |    |    |
| Scenario 6/7                                                                                                   | 4 DSL (in red) |    |    |    |    |        |    |    |                |    |        |    |    |                |    |    |    |    |    |    |
|                                                                                                                | 1              |    |    |    |    |        |    |    |                |    |        |    |    |                |    |    |    |    |    |    |
|                                                                                                                | .9             | 1  |    |    |    |        |    |    |                |    |        |    |    |                |    |    |    |    |    |    |
|                                                                                                                | .9             | .9 | 1  |    |    |        |    |    |                |    |        |    |    |                |    |    |    |    |    |    |
|                                                                                                                | .9             | .9 | .9 | 1  |    |        |    |    |                |    |        |    |    |                |    |    |    |    |    |    |
|                                                                                                                | .9             | .9 | .9 | .9 | 1  |        |    |    |                |    |        |    |    |                |    |    |    |    |    |    |
|                                                                                                                | .9             | .9 | .9 | .9 | .9 | 1      |    |    |                |    |        |    |    |                |    |    |    |    |    |    |
|                                                                                                                | .9             | .9 | .9 | .9 | .9 | .9     | 1  |    |                |    |        |    |    |                |    |    |    |    |    |    |
|                                                                                                                | .9             | .9 | .9 | .9 | .9 | .9     | .9 | 1  |                |    |        |    |    |                |    |    |    |    |    |    |
|                                                                                                                | .9             | .9 | .9 | .9 | .9 | .9     | .9 | .9 | 1              |    |        |    |    |                |    |    |    |    |    |    |
| Scenario 8                                                                                                     |                |    |    |    |    |        |    |    | 1 DSL (in red) |    |        |    |    |                |    |    |    |    |    |    |
|                                                                                                                |                |    |    |    |    |        |    |    | 1              |    |        |    |    |                |    |    |    |    |    |    |
|                                                                                                                |                |    |    |    |    |        |    |    | .9             | 1  |        |    |    |                |    |    |    |    |    |    |
|                                                                                                                |                |    |    |    |    |        |    |    | .9             | .9 | 1      |    |    |                |    |    |    |    |    |    |
|                                                                                                                |                |    |    |    |    |        |    |    | .9             | .9 | .9     | 1  |    |                |    |    |    |    |    |    |
|                                                                                                                |                |    |    |    |    |        |    |    | .9             | .9 | .9     | .9 | 1  |                |    |    |    |    |    |    |
|                                                                                                                |                |    |    |    |    |        |    |    |                |    |        |    | 1  |                |    |    |    |    |    |    |
|                                                                                                                |                |    |    |    |    |        |    |    |                |    |        |    | .9 | 1              |    |    |    |    |    |    |
|                                                                                                                |                |    |    |    |    |        |    |    |                |    |        |    | .9 | .9             | 1  |    |    |    |    |    |
|                                                                                                                |                |    |    |    |    |        |    |    |                |    |        |    | .9 | .9             | .9 | 1  |    |    |    |    |
|                                                                                                                |                |    |    |    |    |        |    |    |                |    |        |    | .9 | .9             | .9 | .9 | 1  |    |    |    |
| Scenario 9/10                                                                                                  |                |    |    |    |    |        |    |    |                |    |        |    |    | 2 DSL (in red) |    |    |    |    |    |    |
|                                                                                                                |                |    |    |    |    |        |    |    |                |    |        |    |    | 1              |    |    |    |    |    |    |
|                                                                                                                |                |    |    |    |    |        |    |    |                |    |        |    |    | .9             | 1  |    |    |    |    |    |
|                                                                                                                |                |    |    |    |    |        |    |    |                |    |        |    |    | .9             | .9 | 1  |    |    |    |    |
|                                                                                                                |                |    |    |    |    |        |    |    |                |    |        |    |    | .9             | .9 | .9 | 1  |    |    |    |
|                                                                                                                |                |    |    |    |    |        |    |    |                |    |        |    |    | .9             | .9 | .9 | .9 | 1  |    |    |
|                                                                                                                |                |    |    |    |    |        |    |    |                |    |        |    |    |                |    |    | 1  |    |    |    |
|                                                                                                                |                |    |    |    |    |        |    |    |                |    |        |    |    |                |    |    | .9 | 1  |    |    |
|                                                                                                                |                |    |    |    |    |        |    |    |                |    |        |    |    |                |    |    | .9 | .9 | 1  |    |
|                                                                                                                |                |    |    |    |    |        |    |    |                |    |        |    |    |                |    |    | .9 | .9 | .9 | 1  |
|                                                                                                                |                |    |    |    |    |        |    |    |                |    |        |    |    |                |    |    | .9 | .9 | .9 | .9 |
|                                                                                                                |                |    |    |    |    |        |    |    |                |    |        |    |    |                |    |    | .9 | .9 | .9 | 1  |

Note. Within blocks (grey shading)  $r=.9$ , between block (no shading),  $r=0$ . Disease Susceptibility Loci (DSL) are indicated in red. All small genes including DSL explain .5% of the phenotypic variance; when a gene includes multiple DSL, the .5% is evenly distributed across all DSL (e.g., in scenario 4, the 4 DSL each explain .125% of the variance). The scenario numbers refer to those in Table 1 of the original manuscript.

Table S1c

Visual representation of the LD patterns used for the simulations including larger genes (60 SNPs)

Scenario 11: 0 Disease Susceptibility Loci (to control Type I error rate)

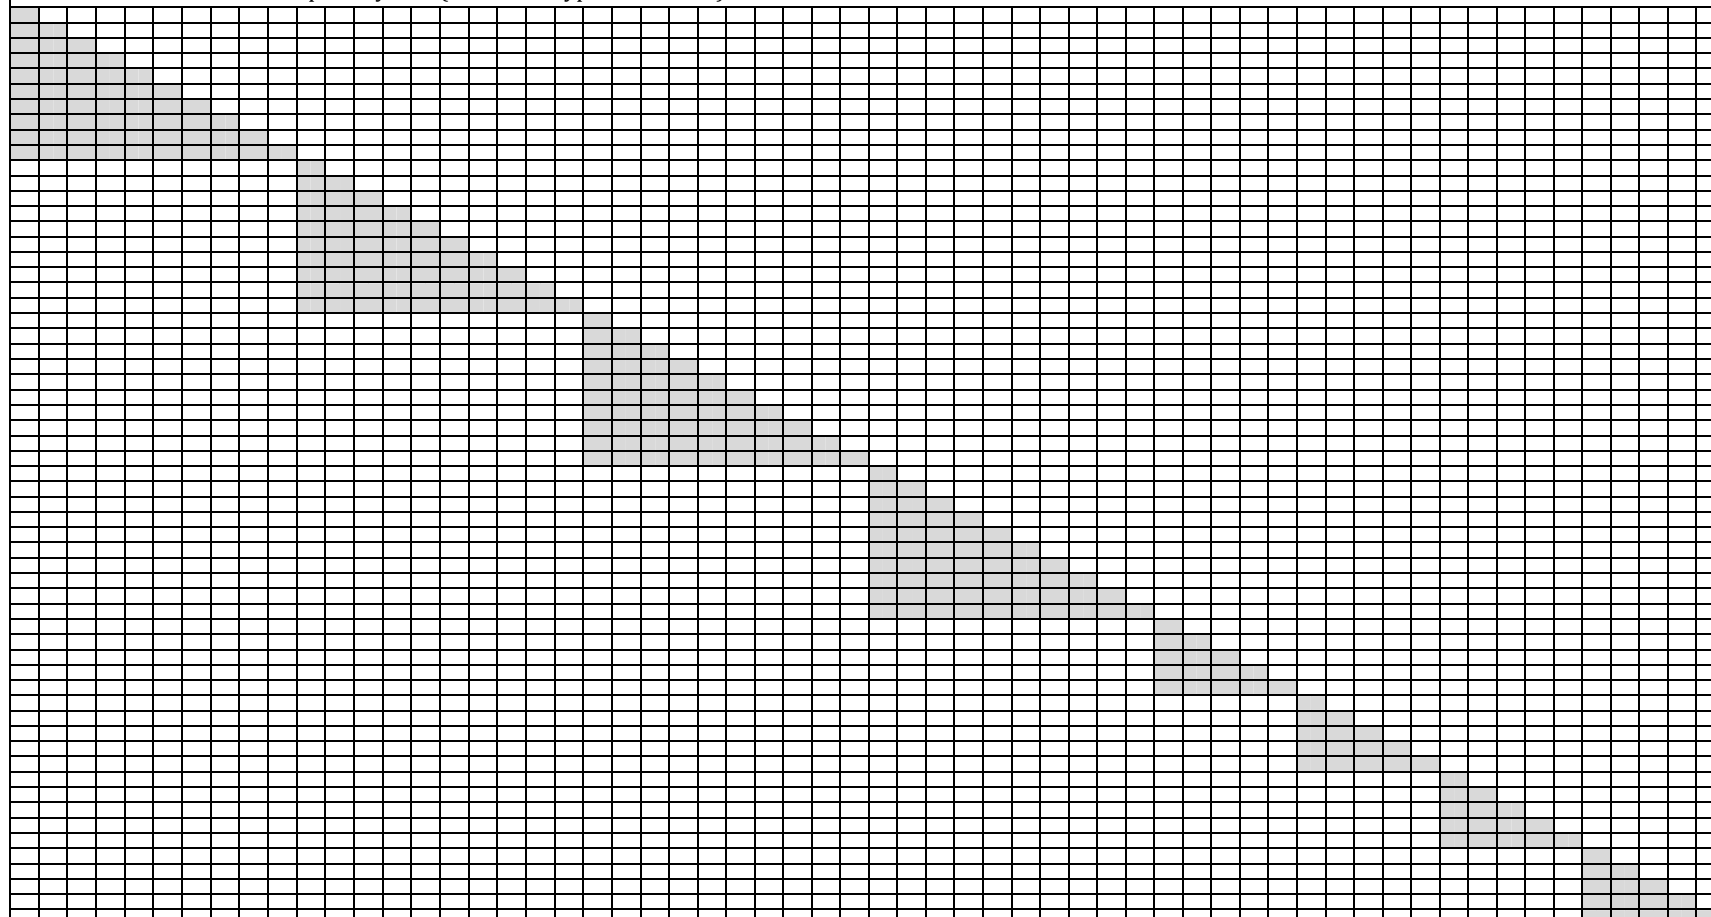

Note. A gene covering 60 SNPs divided over 4 large (10 SNPs) and 4 small (5 SNPs) LD blocks. Within blocks (grey shading)  $r=0.9$ , between block (no shading),  $r=0$ . The scenario numbers refer to those in Table 1 of the original manuscript.

Table S1d

Visual representation of the LD patterns used for the simulations including large genes (60 SNPs)

Scenario 12: 1 Disease Susceptibility Locus (in red) explaining 1% of the variance

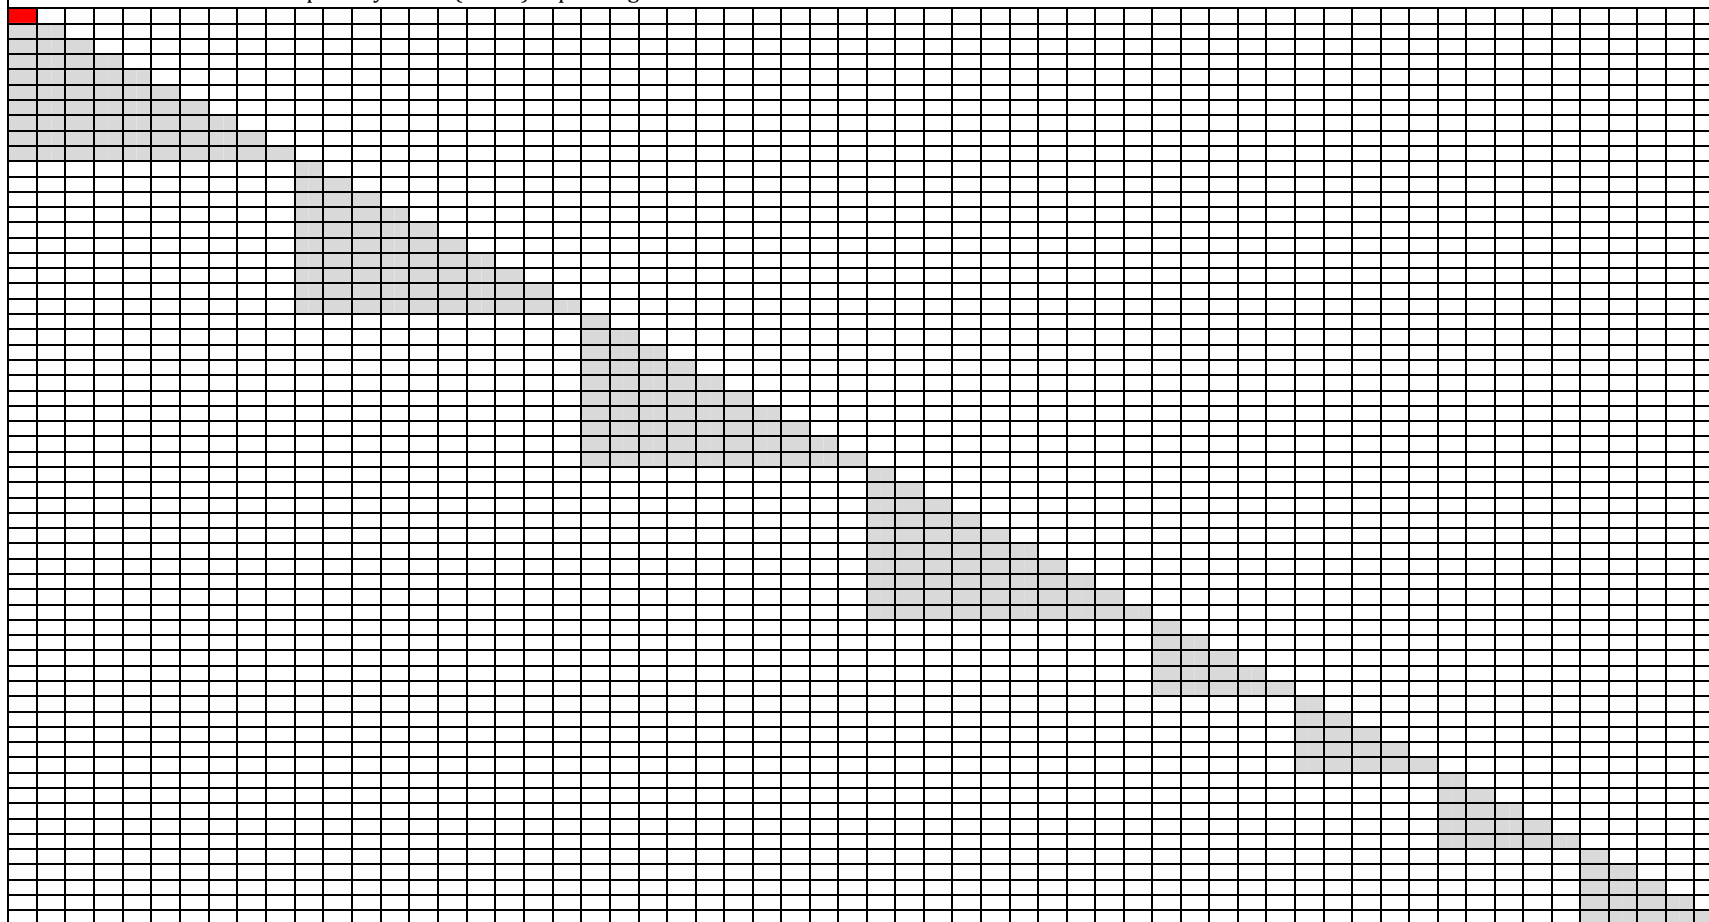

Note. A gene covering 60 SNPs in 4 large (10 SNPs) and 4 small (5 SNPs) LD blocks. Within blocks (grey shading)  $r=.9$ , between block (no shading),  $r=0$ . Disease Susceptibility Loci (DSL) are indicated in red. The scenario numbers refer to those in Table 1 of the original manuscript.

Table S1e

Visual representation of the LD patterns used for the simulations including large genes (60 SNPs)

Scenario 13/14: 8 Disease Susceptibility Loci (in red) together explaining 1% of the variance (i.e., .125% each)

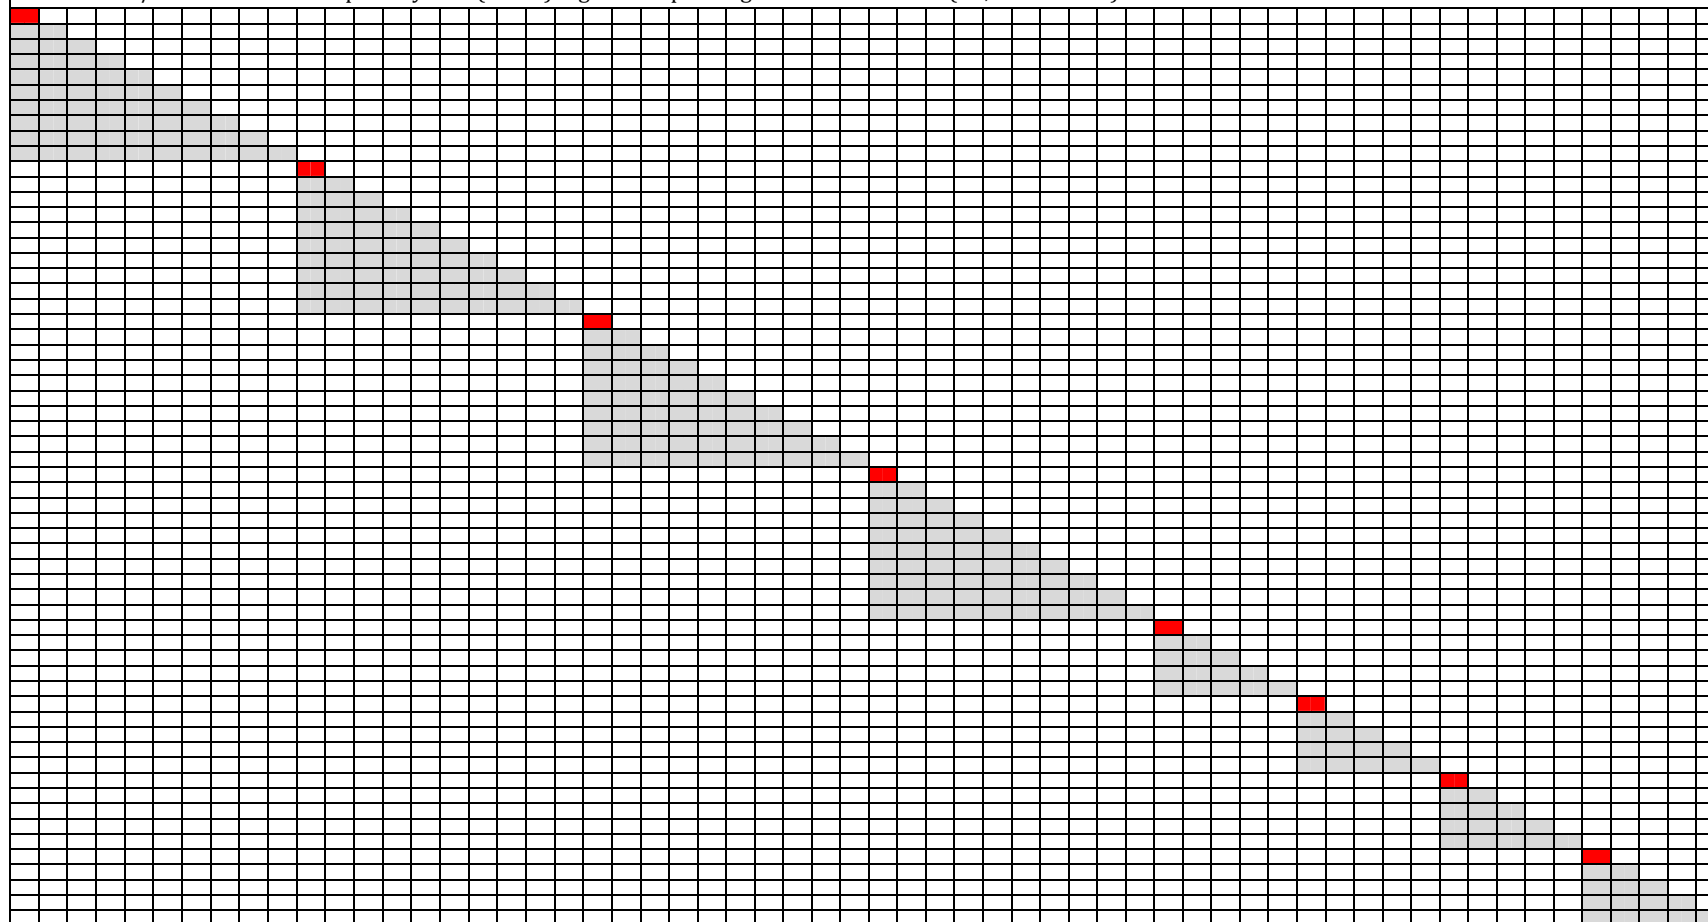

Note. A gene covering 60 SNPs in 4 large (10 SNPs) and 4 small (5 SNPs) LD blocks. Within blocks (grey shading)  $r=0.9$ , between block (no shading),  $r=0$ . Disease Susceptibility Loci (DSL) are indicated in red. The scenario numbers refer to those in Table 1 of the original manuscript.



| Table S2<br>1 factor model, gene-effect on factor                                                                                                                                                                                                                                                                                                                                                                                                                                                                                                                                                                                                                                                                                                                                                                                                                                                                                                                                                                                                                                                                                                                                                                                                                                                                                                                                                                                                                                                                                                                                                                                                                                                                                                                                                                                                                                                                                                                                                                                                                                                                                                                                                                                                                                                                                                         |                                                                |                 |                    |               |                               |               |
|-----------------------------------------------------------------------------------------------------------------------------------------------------------------------------------------------------------------------------------------------------------------------------------------------------------------------------------------------------------------------------------------------------------------------------------------------------------------------------------------------------------------------------------------------------------------------------------------------------------------------------------------------------------------------------------------------------------------------------------------------------------------------------------------------------------------------------------------------------------------------------------------------------------------------------------------------------------------------------------------------------------------------------------------------------------------------------------------------------------------------------------------------------------------------------------------------------------------------------------------------------------------------------------------------------------------------------------------------------------------------------------------------------------------------------------------------------------------------------------------------------------------------------------------------------------------------------------------------------------------------------------------------------------------------------------------------------------------------------------------------------------------------------------------------------------------------------------------------------------------------------------------------------------------------------------------------------------------------------------------------------------------------------------------------------------------------------------------------------------------------------------------------------------------------------------------------------------------------------------------------------------------------------------------------------------------------------------------------------------|----------------------------------------------------------------|-----------------|--------------------|---------------|-------------------------------|---------------|
|                                                                                                                                                                                                                                                                                                                                                                                                                                                                                                                                                                                                                                                                                                                                                                                                                                                                                                                                                                                                                                                                                                                                                                                                                                                                                                                                                                                                                                                                                                                                                                                                                                                                                                                                                                                                                                                                                                                                                                                                                                                                                                                                                                                                                                                                                                                                                           |                                                                | GATES<br>on sum | GATES on<br>MANOVA | MANOVA        | Multiple regression<br>on sum | MGAS          |
| Small gene<br>(10 SNPs;<br>.5% explained)                                                                                                                                                                                                                                                                                                                                                                                                                                                                                                                                                                                                                                                                                                                                                                                                                                                                                                                                                                                                                                                                                                                                                                                                                                                                                                                                                                                                                                                                                                                                                                                                                                                                                                                                                                                                                                                                                                                                                                                                                                                                                                                                                                                                                                                                                                                 | Scenario 1<br><i>1 block, 0 DSL</i>                            | <b>0.0430</b>   | <b>0.0445</b>      | <b>0.0485</b> | <b>0.0470</b>                 | <b>0.0435</b> |
|                                                                                                                                                                                                                                                                                                                                                                                                                                                                                                                                                                                                                                                                                                                                                                                                                                                                                                                                                                                                                                                                                                                                                                                                                                                                                                                                                                                                                                                                                                                                                                                                                                                                                                                                                                                                                                                                                                                                                                                                                                                                                                                                                                                                                                                                                                                                                           | Scenario 2 (IV)*<br><i>1 block, 1 DSL</i>                      | 0.8270          | 0.3280             | 0.1215        | 0.5145                        | 0.7750        |
|                                                                                                                                                                                                                                                                                                                                                                                                                                                                                                                                                                                                                                                                                                                                                                                                                                                                                                                                                                                                                                                                                                                                                                                                                                                                                                                                                                                                                                                                                                                                                                                                                                                                                                                                                                                                                                                                                                                                                                                                                                                                                                                                                                                                                                                                                                                                                           | Scenario 3 (X)<br><i>1 block, 1 DSL (opp<sup>***</sup>)</i>    | 0.0460          | 1.0000             | 1.0000        | 0.0515                        | 1.0000        |
|                                                                                                                                                                                                                                                                                                                                                                                                                                                                                                                                                                                                                                                                                                                                                                                                                                                                                                                                                                                                                                                                                                                                                                                                                                                                                                                                                                                                                                                                                                                                                                                                                                                                                                                                                                                                                                                                                                                                                                                                                                                                                                                                                                                                                                                                                                                                                           | Scenario 4 (V)<br><i>1 block, 2 DSL</i>                        | 0.9830          | 0.6745             | 0.2075        | 0.8465                        | 0.9655        |
|                                                                                                                                                                                                                                                                                                                                                                                                                                                                                                                                                                                                                                                                                                                                                                                                                                                                                                                                                                                                                                                                                                                                                                                                                                                                                                                                                                                                                                                                                                                                                                                                                                                                                                                                                                                                                                                                                                                                                                                                                                                                                                                                                                                                                                                                                                                                                           | Scenario 5<br><i>1 block, 2 DSL (opp<sup>**</sup>)</i>         | 0.0455          | 0.0460             | 0.0605        | 0.0880                        | 0.0445        |
|                                                                                                                                                                                                                                                                                                                                                                                                                                                                                                                                                                                                                                                                                                                                                                                                                                                                                                                                                                                                                                                                                                                                                                                                                                                                                                                                                                                                                                                                                                                                                                                                                                                                                                                                                                                                                                                                                                                                                                                                                                                                                                                                                                                                                                                                                                                                                           | Scenario 6 (VI)<br><i>1 block, 4 DSL</i>                       | 1.0000          | 0.9605             | 0.4610        | 0.9965                        | 1.0000        |
|                                                                                                                                                                                                                                                                                                                                                                                                                                                                                                                                                                                                                                                                                                                                                                                                                                                                                                                                                                                                                                                                                                                                                                                                                                                                                                                                                                                                                                                                                                                                                                                                                                                                                                                                                                                                                                                                                                                                                                                                                                                                                                                                                                                                                                                                                                                                                           | Scenario 7<br><i>1 block, 4 DSL (opp<sup>**</sup>)</i>         | 0.0550          | 0.0465             | 0.0580        | 0.0790                        | 0.0530        |
|                                                                                                                                                                                                                                                                                                                                                                                                                                                                                                                                                                                                                                                                                                                                                                                                                                                                                                                                                                                                                                                                                                                                                                                                                                                                                                                                                                                                                                                                                                                                                                                                                                                                                                                                                                                                                                                                                                                                                                                                                                                                                                                                                                                                                                                                                                                                                           | Scenario 8 (VII)<br><i>2 blocks, 1 DSL</i>                     | 0.7745          | 0.2805             | 0.1175        | 0.5125                        | 0.7045        |
|                                                                                                                                                                                                                                                                                                                                                                                                                                                                                                                                                                                                                                                                                                                                                                                                                                                                                                                                                                                                                                                                                                                                                                                                                                                                                                                                                                                                                                                                                                                                                                                                                                                                                                                                                                                                                                                                                                                                                                                                                                                                                                                                                                                                                                                                                                                                                           | Scenario 9 (VIII)<br><i>2 blocks, 2 DSL</i>                    | 0.6945          | 0.2135             | 0.1145        | 0.5030                        | 0.6070        |
|                                                                                                                                                                                                                                                                                                                                                                                                                                                                                                                                                                                                                                                                                                                                                                                                                                                                                                                                                                                                                                                                                                                                                                                                                                                                                                                                                                                                                                                                                                                                                                                                                                                                                                                                                                                                                                                                                                                                                                                                                                                                                                                                                                                                                                                                                                                                                           | Scenario 10 (IX)<br><i>2 block, 2 DSL (opp<sup>**</sup>)</i>   | 0.7170          | 0.2240             | 0.1300        | 0.5165                        | 0.6355        |
| Large gene<br>(60 SNPs;<br>1% explained)                                                                                                                                                                                                                                                                                                                                                                                                                                                                                                                                                                                                                                                                                                                                                                                                                                                                                                                                                                                                                                                                                                                                                                                                                                                                                                                                                                                                                                                                                                                                                                                                                                                                                                                                                                                                                                                                                                                                                                                                                                                                                                                                                                                                                                                                                                                  | Scenario 11<br><i>8 blocks, 0 DSL</i>                          | <b>0.0545</b>   | <b>0.0585</b>      | <b>0.0520</b> | <b>0.0555</b>                 | <b>0.0555</b> |
|                                                                                                                                                                                                                                                                                                                                                                                                                                                                                                                                                                                                                                                                                                                                                                                                                                                                                                                                                                                                                                                                                                                                                                                                                                                                                                                                                                                                                                                                                                                                                                                                                                                                                                                                                                                                                                                                                                                                                                                                                                                                                                                                                                                                                                                                                                                                                           | Scenario 12 (I)<br><i>8 blocks, 1 DSL</i>                      | 0.9255          | 0.4280             | 0.1130        | 0.4585                        | 0.8740        |
|                                                                                                                                                                                                                                                                                                                                                                                                                                                                                                                                                                                                                                                                                                                                                                                                                                                                                                                                                                                                                                                                                                                                                                                                                                                                                                                                                                                                                                                                                                                                                                                                                                                                                                                                                                                                                                                                                                                                                                                                                                                                                                                                                                                                                                                                                                                                                           | Scenario 13 (II)<br><i>8 blocks, 8 DSL</i>                     | 0.6075          | 0.1525             | 0.1000        | 0.4665                        | 0.5250        |
|                                                                                                                                                                                                                                                                                                                                                                                                                                                                                                                                                                                                                                                                                                                                                                                                                                                                                                                                                                                                                                                                                                                                                                                                                                                                                                                                                                                                                                                                                                                                                                                                                                                                                                                                                                                                                                                                                                                                                                                                                                                                                                                                                                                                                                                                                                                                                           | Scenario 14 (III)<br><i>8 blocks, 8 DSL (opp<sup>**</sup>)</i> | 0.6185          | 0.1565             | 0.0940        | 0.4690                        | 0.5440        |
| <p>Note. DSL=Disease Susceptibility Loci. All <math>N_{rep}=2000</math> simulations included <math>N=2000</math> subjects, <math>N_{phen}=20</math> phenotypes, and small or large genes covering <math>N_{SNP}=10</math> or <math>N_{SNP}=60</math> SNPs, respectively. Simulated data were analyzed in 5 ways all yielding a gene-based p-value. Sum Gates: original Gates procedure conducted on the univariate sum score calculated across the 20 phenotypes; Sum multiple regression: univariate phenotypic sum score regressed on all SNPs within a gene; MANOVA: all 20 phenotypes as dependent variables and all SNPs within a gene as predictors; GATES-MANOVA: all 20 phenotypes as dependent variables and each SNP separately as predictor in MANOVA, the <math>N_{SNP}</math> MANOVA p-values are then combined using GATES; MGAS: weighted selection of the <math>m \times n</math> p-values obtained in regression of all <math>m</math> phenotypes on all <math>n</math> SNPs within a gene, while correcting for the expected correlations between these p-values resulting from the phenotypic correlations and the LD-structure within a gene. MAF was .2 for all simulated SNPs. Within and between LD-blocks, LD measure <math>r</math> was set to .9 and to 0, respectively. As the MGAS procedure has less power to detect larger genes (see Supplemental Information), small genes and large genes explained .5% and 1% of the variance, respectively. As a consequence, power results are not directly comparable between small and large genes. When a gene harboured multiple DSL, the total gene effect was equally distributed across all DSL.</p> <p>* The Roman numerals refer to Figure 2 in the paper. ** Half of the DSL in a gene conveyed a positive effect, the others a negative effect on the factors (Figure 1a,c) or phenotypes (Figure 1c,d,e,f). *** In latent factor models (Figure 1a,c), the one DSL affected half of the phenotypic indicators of a factor positively and the other half negatively. In unclustered networks (Figure 1e), the one DSL affected 1 phenotype positively and another phenotype in the network negatively. In clustered networks (Figure 1f), the one DSL affected either 2 phenotypes in the same cluster, or 2 phenotypes in different clusters, in opposite directions.</p> |                                                                |                 |                    |               |                               |               |

| Table S3<br>1 factor model, gene-effect specific to one phenotype |                                                     |                 |                    |               |                               |               |
|-------------------------------------------------------------------|-----------------------------------------------------|-----------------|--------------------|---------------|-------------------------------|---------------|
|                                                                   |                                                     | GATES<br>on sum | GATES on<br>MANOVA | MANOVA        | Multiple regression<br>on sum | MGAS          |
| Small gene<br>(10 SNPs;<br>.5% explained)                         | Scenario 1<br><i>1 block, 0 DSL</i>                 | <b>0.0505</b>   | <b>0.0495</b>      | <b>0.0450</b> | <b>0.0550</b>                 | <b>0.0495</b> |
|                                                                   | Scenario 2 (IV)*<br><i>1 block, 1 DSL</i>           | 0.0485          | 0.7110             | 0.2665        | 0.0560                        | 0.5075        |
|                                                                   | Scenario 4 (V)<br><i>1 block, 2 DSL</i>             | 0.0510          | 0.9795             | 0.5435        | 0.0540                        | 0.8990        |
|                                                                   | Scenario 5<br><i>1 block, 2 DSL (opp**)</i>         | 0.0435          | 0.0475             | 0.0595        | 0.0570                        | 0.0405        |
|                                                                   | Scenario 6 (VI)<br><i>1 block, 4 DSL</i>            | 0.0560          | 1.0000             | 0.9390        | 0.0520                        | 0.9985        |
|                                                                   | Scenario 7<br><i>1 block, 4 DSL (opp**)</i>         | 0.0470          | 0.0535             | 0.0665        | 0.0485                        | 0.0485        |
|                                                                   | Scenario 8 (VII)<br><i>2 blocks, 1 DSL</i>          | 0.0500          | 0.6720             | 0.2490        | 0.0415                        | 0.4670        |
|                                                                   | Scenario 9 (VIII)<br><i>2 blocks, 2 DSL</i>         | 0.0615          | 0.4840             | 0.2445        | 0.0450                        | 0.2855        |
|                                                                   | Scenario 10 (XI)<br><i>2 block, 2 DSL (opp**)</i>   | 0.0500          | 0.5220             | 0.2545        | 0.0455                        | 0.2975        |
|                                                                   |                                                     |                 |                    |               |                               |               |
| Large gene<br>(60 SNPs;<br>1% explained)                          | Scenario 11<br><i>8 blocks, 0 DSL</i>               | <b>0.0515</b>   | <b>0.0570</b>      | <b>0.0495</b> | <b>0.0435</b>                 | <b>0.0585</b> |
|                                                                   | Scenario 12 (I)<br><i>8 blocks, 1 DSL</i>           | 0.0615          | 0.9520             | 0.2275        | 0.0535                        | 0.7800        |
|                                                                   | Scenario 13 (II)<br><i>8 blocks, 8 DSL</i>          | 0.0470          | 0.3370             | 0.2170        | 0.0530                        | 0.1755        |
|                                                                   | Scenario 14 (III)<br><i>8 blocks, 8 DSL (opp**)</i> | 0.0560          | 0.3685             | 0.2145        | 0.0555                        | 0.2065        |

Note. DSL=Disease Susceptibility Loci. All Nrep=2000 simulations included N=2000 subjects, Nphen=20 phenotypes, and small or large genes covering N<sub>SNP</sub>=10 or N<sub>SNP</sub>=60 SNPs, respectively. Simulated data were analyzed in 5 ways all yielding a gene-based p-value. Sum Gates: original Gates procedure conducted on the univariate sum score calculated across the 20 phenotypes; Sum multiple regression: univariate phenotypic sum score regressed on all SNPs within a gene; MANOVA: all 20 phenotypes as dependent variables and all SNPs within a gene as predictors; GATES-MANOVA: all 20 phenotypes as dependent variables and each SNP separately as predictor in MANOVA, the N<sub>SNP</sub> MANOVA p-values are then combined using GATES; MGAS: weighted selection of the  $m \times n$  p-values obtained in regression of all  $m$  phenotypes on all  $n$  SNPs within a gene, while correcting for the expected correlations between these p-values resulting from the phenotypic correlations and the LD-structure within a gene. MAF was .2 for all simulated SNPs. Within and between LD-blocks, LD measure  $r$  was set to .9 and to 0, respectively. As the MGAS procedure has less power to detect larger genes (see Supplemental Information), small genes and large genes explained .5% and 1% of the variance, respectively. As a consequence, power results are not directly comparable between small and large genes. When a gene harboured multiple DSL, the total gene effect was equally distributed across all DSL.

\* The Roman numerals refer to Figure 2 in the paper. \*\* Half of the DSL in a gene conveyed a positive effect, the others a negative effect on the factors (Figure 1a,c) or phenotypes (Figure 1c,d,e,f). \*\*\* In latent factor models (Figure 1a,c), the one DSL affected half of the phenotypic indicators of a factor positively and the other half negatively. In unclustered networks (Figure 1e), the one DSL affected 1 phenotype positively and another phenotype in the network negatively. In clustered networks (Figure 1f), the one DSL affected either 2 phenotypes in the same cluster, or 2 phenotypes in different clusters, in opposite directions.

| Table S4<br>4 factor model, gene-effect on one of the four factors |                                                                |                 |                    |               |                               |               |
|--------------------------------------------------------------------|----------------------------------------------------------------|-----------------|--------------------|---------------|-------------------------------|---------------|
|                                                                    |                                                                | GATES<br>on sum | GATES on<br>MANOVA | MANOVA        | Multiple regression<br>on sum | MGAS          |
| Small gene<br>(10 SNPs;<br>.5% explained)                          | Scenario 1<br><i>1 block, 0 DSL</i>                            | <b>0.0465</b>   | <b>0.0495</b>      | <b>0.0510</b> | <b>0.0485</b>                 | <b>0.0445</b> |
|                                                                    | Scenario 2 (IV)*<br><i>1 block, 1 DSL</i>                      | 0.1765          | 0.3030             | 0.1215        | 0.1050                        | 0.5290        |
|                                                                    | Scenario 3 (X)<br><i>1 block, 1 DSL (opp<sup>***</sup>)</i>    | 0.0530          | 1.0000             | 0.9965        | 0.0455                        | 0.9925        |
|                                                                    | Scenario 4 (V)<br><i>1 block, 2 DSL</i>                        | 0.3110          | 0.6680             | 0.2095        | 0.1455                        | 0.8830        |
|                                                                    | Scenario 5<br><i>1 block, 2 DSL (opp<sup>**</sup>)</i>         | 0.0425          | 0.0405             | 0.0555        | 0.0515                        | 0.0555        |
|                                                                    | Scenario 6 (VI)<br><i>1 block, 4 DSL</i>                       | 0.5465          | 0.9595             | 0.4950        | 0.2525                        | 0.9955        |
|                                                                    | Scenario 7<br><i>1 block, 4 DSL (opp<sup>**</sup>)</i>         | 0.0520          | 0.0420             | 0.0585        | 0.0545                        | 0.0475        |
|                                                                    | Scenario 8 (VII)<br><i>2 blocks, 1 DSL</i>                     | 0.1585          | 0.2660             | 0.1180        | 0.0985                        | 0.4850        |
|                                                                    | Scenario 9 (VIII)<br><i>2 blocks, 2 DSL</i>                    | 0.1605          | 0.2100             | 0.1340        | 0.1050                        | 0.3685        |
|                                                                    | Scenario 10 (IX)<br><i>2 block, 2 DSL (opp<sup>**</sup>)</i>   | 0.1600          | 0.2205             | 0.1155        | 0.1065                        | 0.4010        |
|                                                                    |                                                                |                 |                    |               |                               |               |
| Large gene<br>(60 SNPs;<br>1% explained)                           | Scenario 11<br><i>8 blocks, 0 DSL</i>                          | <b>0.0460</b>   | <b>0.0555</b>      | <b>0.0425</b> | <b>0.0520</b>                 | <b>0.0565</b> |
|                                                                    | Scenario 12 (I)<br><i>8 blocks, 1 DSL</i>                      | 0.1625          | 0.4500             | 0.1135        | 0.0885                        | 0.7295        |
|                                                                    | Scenario 13 (II)<br><i>8 blocks, 8 DSL</i>                     | 0.1415          | 0.1585             | 0.0960        | 0.0860                        | 0.2780        |
|                                                                    | Scenario 14 (III)<br><i>8 blocks, 8 DSL (opp<sup>**</sup>)</i> | 0.1130          | 0.1570             | 0.1055        | 0.0785                        | 0.2705        |

Note. DSL=Disease Susceptibility Loci. All  $N_{rep}=2000$  simulations included  $N=2000$  subjects,  $N_{phen}=20$  phenotypes, and small or large genes covering  $N_{SNP}=10$  or  $N_{SNP}=60$  SNPs, respectively. Simulated data were analyzed in 5 ways all yielding a gene-based p-value. Sum Gates: original Gates procedure conducted on the univariate sum score calculated across the 20 phenotypes; Sum multiple regression: univariate phenotypic sum score regressed on all SNPs within a gene; MANOVA: all 20 phenotypes as dependent variables and all SNPs within a gene as predictors; GATES-MANOVA: all 20 phenotypes as dependent variables and each SNP separately as predictor in MANOVA, the  $N_{SNP}$  MANOVA p-values are then combined using GATES; MGAS: weighted selection of the  $m \times n$  p-values obtained in regression of all  $m$  phenotypes on all  $n$  SNPs within a gene, while correcting for the expected correlations between these p-values resulting from the phenotypic correlations and the LD-structure within a gene. MAF was .2 for all simulated SNPs. Within and between LD-blocks, LD measure  $r$  was set to .9 and to 0, respectively. As the MGAS procedure has less power to detect larger genes (see Supplemental Information), small genes and large genes explained .5% and 1% of the variance, respectively. As a consequence, power results are not directly comparable between small and large genes. When a gene harboured multiple DSL, the total gene effect was equally distributed across all DSL.

\* The Roman numerals refer to Figure 2 in the paper. \*\* Half of the DSL in a gene conveyed a positive effect, the others a negative effect on the factors (Figure 1a,c) or phenotypes (Figure 1c,d,e,f). \*\*\* In latent factor models (Figure 1a,c), the one DSL affected half of the phenotypic indicators of a factor positively and the other half negatively. In unclustered networks (Figure 1e), the one DSL affected 1 phenotype positively and another phenotype in the network negatively. In clustered networks (Figure 1f), the one DSL affected either 2 phenotypes in the same cluster, or 2 phenotypes in different clusters, in opposite directions.

| Table S5<br>4 factor model, gene-effect specific to one phenotype |                                                     |                 |                    |               |                               |               |
|-------------------------------------------------------------------|-----------------------------------------------------|-----------------|--------------------|---------------|-------------------------------|---------------|
|                                                                   |                                                     | GATES<br>on sum | GATES on<br>MANOVA | MANOVA        | Multiple regression<br>on sum | MGAS          |
| Small gene<br>(10 SNPs;<br>.5% explained)                         | Scenario 1<br><i>1 block, 0 DSL</i>                 | <b>0.0455</b>   | <b>0.0515</b>      | <b>0.0510</b> | <b>0.0535</b>                 | <b>0.0430</b> |
|                                                                   | Scenario 2 (IV)*<br><i>1 block, 1 DSL</i>           | 0.0460          | 0.6365             | 0.2240        | 0.0515                        | 0.5025        |
|                                                                   | Scenario 4 (V)<br><i>1 block, 2 DSL</i>             | 0.0665          | 0.9490             | 0.4695        | 0.0545                        | 0.8655        |
|                                                                   | Scenario 5<br><i>1 block, 2 DSL (opp**)</i>         | 0.0540          | 0.0435             | 0.0515        | 0.0595                        | 0.0485        |
|                                                                   | Scenario 6 (VI)<br><i>1 block, 4 DSL</i>            | 0.0760          | 1.0000             | 0.8820        | 0.0600                        | 0.9995        |
|                                                                   | Scenario 7<br><i>1 block, 4 DSL (opp**)</i>         | 0.0375          | 0.0475             | 0.0540        | 0.0515                        | 0.0485        |
|                                                                   | Scenario 8 (VII)<br><i>2 blocks, 1 DSL</i>          | 0.0590          | 0.5700             | 0.1980        | 0.0475                        | 0.4495        |
|                                                                   | Scenario 9 (VIII)<br><i>2 blocks, 2 DSL</i>         | 0.0650          | 0.4245             | 0.2165        | 0.0545                        | 0.3035        |
|                                                                   | Scenario 10 (XI)<br><i>2 block, 2 DSL (opp**)</i>   | 0.0620          | 0.4510             | 0.2110        | 0.0555                        | 0.3280        |
|                                                                   |                                                     |                 |                    |               |                               |               |
| Large gene<br>(60 SNPs;<br>1% explained)                          | Scenario 11<br><i>8 blocks, 0 DSL</i>               | <b>0.0570</b>   | <b>0.0540</b>      | <b>0.0470</b> | <b>0.0495</b>                 | <b>0.0605</b> |
|                                                                   | Scenario 12 (I)<br><i>8 blocks, 1 DSL</i>           | 0.0620          | 0.8970             | 0.1745        | 0.0565                        | 0.7770        |
|                                                                   | Scenario 13 (II)<br><i>8 blocks, 8 DSL</i>          | 0.0510          | 0.3025             | 0.1810        | 0.0645                        | 0.2190        |
|                                                                   | Scenario 14 (III)<br><i>8 blocks, 8 DSL (opp**)</i> | 0.0610          | 0.2850             | 0.1725        | 0.0480                        | 0.2025        |
|                                                                   |                                                     |                 |                    |               |                               |               |

Note. DSL=Disease Susceptibility Loci. All Nrep=2000 simulations included N=2000 subjects, Nphen=20 phenotypes, and small or large genes covering N<sub>SNP</sub>=10 or N<sub>SNP</sub>=60 SNPs, respectively. Simulated data were analyzed in 5 ways all yielding a gene-based p-value. Sum Gates: original Gates procedure conducted on the univariate sum score calculated across the 20 phenotypes; Sum multiple regression: univariate phenotypic sum score regressed on all SNPs within a gene; MANOVA: all 20 phenotypes as dependent variables and all SNPs within a gene as predictors; GATES-MANOVA: all 20 phenotypes as dependent variables and each SNP separately as predictor in MANOVA, the N<sub>SNP</sub> MANOVA p-values are then combined using GATES; MGAS: weighted selection of the *m* $\times$ *n* p-values obtained in regression of all *m* phenotypes on all *n* SNPs within a gene, while correcting for the expected correlations between these p-values resulting from the phenotypic correlations and the LD-structure within a gene. MAF was .2 for all simulated SNPs. Within and between LD-blocks, LD measure *r* was set to .9 and to 0, respectively. As the MGAS procedure has less power to detect larger genes (see Supplemental Information), small genes and large genes explained .5% and 1% of the variance, respectively. As a consequence, power results are not directly comparable between small and large genes. When a gene harboured multiple DSL, the total gene effect was equally distributed across all DSL.

\* The Roman numerals refer to Figure 2 in the paper. \*\* Half of the DSL in a gene conveyed a positive effect, the others a negative effect on the factors (Figure 1a,c) or phenotypes (Figure 1c,d,e,f). \*\*\* In latent factor models (Figure 1a,c), the one DSL affected half of the phenotypic indicators of a factor positively and the other half negatively. In unclustered networks (Figure 1e), the one DSL affected 1 phenotype positively and another phenotype in the network negatively. In clustered networks (Figure 1f), the one DSL affected either 2 phenotypes in the same cluster, or 2 phenotypes in different clusters, in opposite directions.

| Table S6<br>Network model mimicking 1-factor model (i.e., all phenotypes equally strongly related),<br>gene-effect specific to one phenotype                                                                                                                                                                                                                                                                                                                                                                                                                                                                                                                                                                                                                                                                                                                                                                                                                                                                                                                                                                                                                                                                                                                                                                                                                                                                                                                                                                                                                                                                                                                                                                                                                                                                                                                                                                                                                                                                                                                                                                                                                                                                                                                            |                                                                |                 |                    |               |                               |               |
|-------------------------------------------------------------------------------------------------------------------------------------------------------------------------------------------------------------------------------------------------------------------------------------------------------------------------------------------------------------------------------------------------------------------------------------------------------------------------------------------------------------------------------------------------------------------------------------------------------------------------------------------------------------------------------------------------------------------------------------------------------------------------------------------------------------------------------------------------------------------------------------------------------------------------------------------------------------------------------------------------------------------------------------------------------------------------------------------------------------------------------------------------------------------------------------------------------------------------------------------------------------------------------------------------------------------------------------------------------------------------------------------------------------------------------------------------------------------------------------------------------------------------------------------------------------------------------------------------------------------------------------------------------------------------------------------------------------------------------------------------------------------------------------------------------------------------------------------------------------------------------------------------------------------------------------------------------------------------------------------------------------------------------------------------------------------------------------------------------------------------------------------------------------------------------------------------------------------------------------------------------------------------|----------------------------------------------------------------|-----------------|--------------------|---------------|-------------------------------|---------------|
|                                                                                                                                                                                                                                                                                                                                                                                                                                                                                                                                                                                                                                                                                                                                                                                                                                                                                                                                                                                                                                                                                                                                                                                                                                                                                                                                                                                                                                                                                                                                                                                                                                                                                                                                                                                                                                                                                                                                                                                                                                                                                                                                                                                                                                                                         |                                                                | GATES<br>on sum | GATES on<br>MANOVA | MANOVA        | Multiple regression<br>on sum | MGAS          |
| Small gene<br>(10 SNPs;<br>.5% explained)                                                                                                                                                                                                                                                                                                                                                                                                                                                                                                                                                                                                                                                                                                                                                                                                                                                                                                                                                                                                                                                                                                                                                                                                                                                                                                                                                                                                                                                                                                                                                                                                                                                                                                                                                                                                                                                                                                                                                                                                                                                                                                                                                                                                                               | Scenario 1<br><i>1 block, 0 DSL</i>                            | <b>0.0495</b>   | <b>0.0485</b>      | <b>0.0465</b> | <b>0.0470</b>                 | <b>0.0435</b> |
|                                                                                                                                                                                                                                                                                                                                                                                                                                                                                                                                                                                                                                                                                                                                                                                                                                                                                                                                                                                                                                                                                                                                                                                                                                                                                                                                                                                                                                                                                                                                                                                                                                                                                                                                                                                                                                                                                                                                                                                                                                                                                                                                                                                                                                                                         | Scenario 2 (IV)*<br><i>1 block, 1 DSL</i>                      | 0.1600          | 0.6855             | 0.2395        | 0.0780                        | 0.6680        |
|                                                                                                                                                                                                                                                                                                                                                                                                                                                                                                                                                                                                                                                                                                                                                                                                                                                                                                                                                                                                                                                                                                                                                                                                                                                                                                                                                                                                                                                                                                                                                                                                                                                                                                                                                                                                                                                                                                                                                                                                                                                                                                                                                                                                                                                                         | Scenario 3 (X)<br><i>1 block, 1 DSL (opp<sup>***</sup>)</i>    | 0.0460          | 0.9880             | 0.6020        | 0.0525                        | 0.7865        |
|                                                                                                                                                                                                                                                                                                                                                                                                                                                                                                                                                                                                                                                                                                                                                                                                                                                                                                                                                                                                                                                                                                                                                                                                                                                                                                                                                                                                                                                                                                                                                                                                                                                                                                                                                                                                                                                                                                                                                                                                                                                                                                                                                                                                                                                                         | Scenario 4 (V)<br><i>1 block, 2 DSL</i>                        | 0.2545          | 0.9660             | 0.5280        | 0.1190                        | 0.9615        |
|                                                                                                                                                                                                                                                                                                                                                                                                                                                                                                                                                                                                                                                                                                                                                                                                                                                                                                                                                                                                                                                                                                                                                                                                                                                                                                                                                                                                                                                                                                                                                                                                                                                                                                                                                                                                                                                                                                                                                                                                                                                                                                                                                                                                                                                                         | Scenario 5<br><i>1 block, 2 DSL (opp<sup>**</sup>)</i>         | 0.0450          | 0.0485             | 0.0600        | 0.0510                        | 0.0460        |
|                                                                                                                                                                                                                                                                                                                                                                                                                                                                                                                                                                                                                                                                                                                                                                                                                                                                                                                                                                                                                                                                                                                                                                                                                                                                                                                                                                                                                                                                                                                                                                                                                                                                                                                                                                                                                                                                                                                                                                                                                                                                                                                                                                                                                                                                         | Scenario 6 (VI)<br><i>1 block, 4 DSL</i>                       | 0.4345          | 1.0000             | 0.9145        | 0.1945                        | 1.0000        |
|                                                                                                                                                                                                                                                                                                                                                                                                                                                                                                                                                                                                                                                                                                                                                                                                                                                                                                                                                                                                                                                                                                                                                                                                                                                                                                                                                                                                                                                                                                                                                                                                                                                                                                                                                                                                                                                                                                                                                                                                                                                                                                                                                                                                                                                                         | Scenario 7<br><i>1 block, 4 DSL (opp<sup>**</sup>)</i>         | 0.0355          | 0.0610             | 0.0705        | 0.0475                        | 0.0400        |
|                                                                                                                                                                                                                                                                                                                                                                                                                                                                                                                                                                                                                                                                                                                                                                                                                                                                                                                                                                                                                                                                                                                                                                                                                                                                                                                                                                                                                                                                                                                                                                                                                                                                                                                                                                                                                                                                                                                                                                                                                                                                                                                                                                                                                                                                         | Scenario 8 (VII)<br><i>2 blocks, 1 DSL</i>                     | 0.1340          | 0.6465             | 0.2435        | 0.0875                        | 0.6040        |
|                                                                                                                                                                                                                                                                                                                                                                                                                                                                                                                                                                                                                                                                                                                                                                                                                                                                                                                                                                                                                                                                                                                                                                                                                                                                                                                                                                                                                                                                                                                                                                                                                                                                                                                                                                                                                                                                                                                                                                                                                                                                                                                                                                                                                                                                         | Scenario 9 (VIII)<br><i>2 blocks, 2 DSL</i>                    | 0.1250          | 0.4980             | 0.2610        | 0.0780                        | 0.4350        |
|                                                                                                                                                                                                                                                                                                                                                                                                                                                                                                                                                                                                                                                                                                                                                                                                                                                                                                                                                                                                                                                                                                                                                                                                                                                                                                                                                                                                                                                                                                                                                                                                                                                                                                                                                                                                                                                                                                                                                                                                                                                                                                                                                                                                                                                                         | Scenario 10 (IX)<br><i>2 block, 2 DSL (opp<sup>**</sup>)</i>   | 0.1050          | 0.2310             | 0.1290        | 0.0655                        | 0.1925        |
| Large gene<br>(60 SNPs;<br>1% explained)                                                                                                                                                                                                                                                                                                                                                                                                                                                                                                                                                                                                                                                                                                                                                                                                                                                                                                                                                                                                                                                                                                                                                                                                                                                                                                                                                                                                                                                                                                                                                                                                                                                                                                                                                                                                                                                                                                                                                                                                                                                                                                                                                                                                                                | Scenario 11<br><i>8 blocks, 0 DSL</i>                          | <b>0.0550</b>   | <b>0.0575</b>      | <b>0.0505</b> | <b>0.0470</b>                 | <b>0.0535</b> |
|                                                                                                                                                                                                                                                                                                                                                                                                                                                                                                                                                                                                                                                                                                                                                                                                                                                                                                                                                                                                                                                                                                                                                                                                                                                                                                                                                                                                                                                                                                                                                                                                                                                                                                                                                                                                                                                                                                                                                                                                                                                                                                                                                                                                                                                                         | Scenario 12 (I)<br><i>8 blocks, 1 DSL</i>                      | 0.1080          | 0.9340             | 0.2070        | 0.0640                        | 0.9090        |
|                                                                                                                                                                                                                                                                                                                                                                                                                                                                                                                                                                                                                                                                                                                                                                                                                                                                                                                                                                                                                                                                                                                                                                                                                                                                                                                                                                                                                                                                                                                                                                                                                                                                                                                                                                                                                                                                                                                                                                                                                                                                                                                                                                                                                                                                         | Scenario 13 (II)<br><i>8 blocks, 8 DSL</i>                     | 0.1085          | 0.3465             | 0.1710        | 0.0670                        | 0.2865        |
|                                                                                                                                                                                                                                                                                                                                                                                                                                                                                                                                                                                                                                                                                                                                                                                                                                                                                                                                                                                                                                                                                                                                                                                                                                                                                                                                                                                                                                                                                                                                                                                                                                                                                                                                                                                                                                                                                                                                                                                                                                                                                                                                                                                                                                                                         | Scenario 14 (III)<br><i>8 blocks, 8 DSL (opp<sup>**</sup>)</i> | 0.0780          | 0.1605             | 0.1075        | 0.0580                        | 0.1275        |
| <p>Note. DSL=Disease Susceptibility Loci. All Nrep=2000 simulations included N=2000 subjects, Nphen=20 phenotypes, and small or large genes covering N<sub>SNP</sub>=10 or N<sub>SNP</sub>=60 SNPs, respectively. Simulated data were analyzed in 5 ways all yielding a gene-based p-value. Sum Gates: original Gates procedure conducted on the univariate sum score calculated across the 20 phenotypes; Sum multiple regression: univariate phenotypic sum score regressed on all SNPs within a gene; MANOVA: all 20 phenotypes as dependent variables and all SNPs within a gene as predictors; GATES-MANOVA: all 20 phenotypes as dependent variables and each SNP separately as predictor in MANOVA, the N<sub>SNP</sub> MANOVA p-values are then combined using GATES; MGAS: weighted selection of the <i>m</i> × <i>n</i> p-values obtained in regression of all <i>m</i> phenotypes on all <i>n</i> SNPs within a gene, while correcting for the expected correlations between these p-values resulting from the phenotypic correlations and the LD-structure within a gene. MAF was .2 for all simulated SNPs. Within and between LD-blocks, LD measure <i>r</i> was set to .9 and to 0, respectively. As the MGAS procedure has less power to detect larger genes (see Supplemental Information), small genes and large genes explained .5% and 1% of the variance, respectively. As a consequence, power results are not directly comparable between small and large genes. When a gene harboured multiple DSL, the total gene effect was equally distributed across all DSL.</p> <p>* The Roman numerals refer to Figure 2 in the paper. ** Half of the DSL in a gene conveyed a positive effect, the others a negative effect on the factors (Figure 1a,c) or phenotypes (Figure 1c,d,e,f). *** In latent factor models (Figure 1a,c), the one DSL affected half of the phenotypic indicators of a factor positively and the other half negatively. In unclustered networks (Figure 1e), the one DSL affected 1 phenotype positively and another phenotype in the network negatively. In clustered networks (Figure 1f), the one DSL affected either 2 phenotypes in the same cluster, or 2 phenotypes in different clusters, in opposite directions.</p> |                                                                |                 |                    |               |                               |               |

| Table S7<br>Network model mimicking 4-factor model (i.e., clusters of phenotypes), gene-effect specific to one phenotype |                                                              |                 |                    |               |                               |                              |
|--------------------------------------------------------------------------------------------------------------------------|--------------------------------------------------------------|-----------------|--------------------|---------------|-------------------------------|------------------------------|
|                                                                                                                          |                                                              | GATES<br>on sum | GATES on<br>MANOVA | MANOVA        | Multiple regression<br>on sum | MGAS                         |
| Small gene<br>(10 SNPs;<br>.5% explained)                                                                                | Scenario 1<br><i>1 block, 0 DSL</i>                          | <b>0.0450</b>   | <b>0.0545</b>      | <b>0.0465</b> | <b>0.0450</b>                 | <b>0.0470</b>                |
|                                                                                                                          | Scenario 2 (IV)*<br><i>1 block, 1 DSL</i>                    | 0.1235          | 0.5815             | 0.1820        | 0.0710                        | 0.6805                       |
|                                                                                                                          | Scenario 3 (X)<br><i>1 block, 1 DSL (opp<sup>***</sup>)</i>  | 0.0410          | 0.9500             | 0.4800        | 0.0445                        | 0.6700                       |
|                                                                                                                          | Scenario 3 (XI)<br><i>1 block, 1 DSL (opp<sup>***</sup>)</i> | 0.0405          | 0.9555             | 0.4930        | 0.0435                        | 0.8960                       |
|                                                                                                                          | Scenario 4 (V)<br><i>1 block, 2 DSL</i>                      | 0.2280          | 0.9245             | 0.4370        | 0.1010                        | 0.9620                       |
|                                                                                                                          | Scenario 5<br><i>1 block, 2 DSL (opp<sup>**</sup>)</i>       | 0.0440          | 0.0515             | 0.0640        | 0.0540                        | 0.0540                       |
|                                                                                                                          | Scenario 6 (VI)<br><i>1 block, 4 DSL</i>                     | 0.4005          | 1.0000             | 0.8370        | 0.1745                        | 1.0000                       |
|                                                                                                                          | Scenario 7<br><i>1 block, 4 DSL (opp<sup>**</sup>)</i>       | 0.0440          | 0.0470             | 0.0605        | 0.0530                        | 0.0470                       |
|                                                                                                                          | Scenario 8 (VII)<br><i>2 blocks, 1 DSL</i>                   | 0.1115          | 0.5240             | 0.1845        | 0.0665                        | 0.6250                       |
|                                                                                                                          | Scenario 9 (VIII)<br><i>2 blocks, 2 DSL</i>                  | 0.1095          | 0.3990             | 0.2010        | 0.0735                        | 0.4445                       |
| Scenario 10 (IX)<br><i>2 block, 2 DSL (opp<sup>**</sup>)</i>                                                             | 0.0850                                                       | 0.2325          | 0.1175             | 0.0685        | 0.2495                        |                              |
| Large gene<br>(60 SNPs;<br>1% explained)                                                                                 | Scenario 11<br><i>8 blocks, 0 DSL</i>                        | <b>0.0555</b>   | <b>0.0575</b>      | <b>0.0435</b> | <b>0.0500</b>                 | <b>0.0590<sup>****</sup></b> |
|                                                                                                                          | Scenario 12 (I)<br><i>8 blocks, 1 DSL</i>                    | 0.0985          | 0.8510             | 0.1615        | 0.0680                        | 0.9295                       |
|                                                                                                                          | Scenario 13 (II)<br><i>8 blocks, 8 DSL</i>                   | 0.1065          | 0.2970             | 0.1890        | 0.0760                        | 0.3100                       |
|                                                                                                                          | Scenario 14 (III)<br><i>8 blocks, 8 DSL (opp)</i>            | 0.0740          | 0.1620             | 0.1070        | 0.0490                        | 0.1580                       |

Note. DSL=Disease Susceptibility Loci. All Nrep=2000 simulations included N=2000 subjects, Nphen=20 phenotypes, and small or large genes covering N<sub>SNP</sub>=10 or N<sub>SNP</sub>=60 SNPs, respectively. Simulated data were analyzed in 5 ways all yielding a gene-based p-value. Sum Gates: original Gates procedure conducted on the univariate sum score calculated across the 20 phenotypes; Sum multiple regression: univariate phenotypic sum score regressed on all SNPs within a gene; MANOVA: all 20 phenotypes as dependent variables and all SNPs within a gene as predictors; GATES-MANOVA: all 20 phenotypes as dependent variables and each SNP separately as predictor in MANOVA, the N<sub>SNP</sub> MANOVA p-values are then combined using GATES; MGAS: weighted selection of the *m* × *n* p-values obtained in regression of all *m* phenotypes on all *n* SNPs within a gene, while correcting for the expected correlations between these p-values resulting from the phenotypic correlations and the LD-structure within a gene. MAF was .2 for all simulated SNPs. Within and between LD-blocks, LD measure *r* was set to .9 and to 0, respectively. As the MGAS procedure has less power to detect larger genes (see Supplemental Information), small genes and large genes explained .5% and 1% of the variance, respectively. As a consequence, power results are not directly comparable between small and large genes. When a gene harboured multiple DSL, the total gene effect was equally distributed across all DSL.

\* The Roman numerals refer to Figure 2 in the paper. \*\* Half of the DSL in a gene conveyed a positive effect, the others a negative effect on the factors (Figure 1a,c) or phenotypes (Figure 1c,d,e,f). \*\*\* In latent factor models (Figure 1a,c), the one DSL affected half of the phenotypic indicators of a factor positively and the other half negatively. In unclustered networks (Figure 1e), the one DSL affected 1 phenotype positively and another phenotype in the network negatively. In clustered networks (Figure 1f), the one DSL affected either 2 phenotypes in the same cluster (X), or 2 phenotypes in different clusters (XI), in opposite directions. \*\*\*\* Across multiple simulation runs, this scenario showed a slight tendency towards inflation (~.063).

| Table S8<br>Phenotypic correlations between 9 metabolic traits, corrected for sex, oral contraceptive use and pregnancy |       |       |       |       |       |       |       |       |       |
|-------------------------------------------------------------------------------------------------------------------------|-------|-------|-------|-------|-------|-------|-------|-------|-------|
|                                                                                                                         | BMI   | CRP   | DBP   | GLU   | HDL   | INS   | LDL   | SBP   | TG    |
| BMI                                                                                                                     | 1     | .220  | .304  | .182  | -.306 | .519  | .227  | .295  | .323  |
| CRP                                                                                                                     | .220  | 1     | .056  | .036  | -.092 | .154  | .000  | .071  | .092  |
| DBP                                                                                                                     | .304  | .056  | 1     | .132  | -.068 | .296  | .136  | .599  | .230  |
| GLU                                                                                                                     | .182  | .036  | .132  | 1     | -.045 | .313  | .020  | .175  | .104  |
| HDL                                                                                                                     | -.306 | -.092 | -.068 | -.045 | 1     | -.273 | -.137 | -.013 | -.325 |
| INS                                                                                                                     | .519  | .154  | .296  | .313  | -.273 | 1     | .189  | .261  | .443  |
| LDL                                                                                                                     | .227  | .000  | .136  | .020  | -.137 | .189  | 1     | .087  | .256  |
| SBP                                                                                                                     | .295  | .071  | .599  | .175  | -.013 | .261  | .087  | 1     | .177  |
| TG                                                                                                                      | .323  | .092  | .230  | .104  | -.325 | .443  | .256  | .177  | 1     |

Note: Abbreviations are: body mass index (BMI), C-reactive protein (CRP), diastolic blood pressure (DBP), glucose (GLU), high-density Lipoprotein (HDL), insulin (INS), low-density lipoprotein (LDL), systolic blood pressure (SBP), and triglycerides (TG). These 9 traits are part of the Northern Finland Birth Cohort data (NFBC1966, Sabatti et al. 2009), found at <http://www.ncbi.nlm.nih.gov/gap>, controlled through dbGaP study accession number phs000276.v1.p1. The NFBC1966 Study is conducted and supported by the National Heart, Lung, and Blood Institute (NHLBI) in collaboration with the Broad Institute, UCLA, University of Oulu, and the National Institute for Health and Welfare in Finland. This manuscript was not prepared in collaboration with investigators of the NFBC1966 Study and does not necessarily reflect the opinions or views of the NFBC1966 Study Investigators, Broad Institute, UCLA, University of Oulu, National Institute for Health and Welfare in Finland, and the NHLBI.

Sabatti, C., Service, S.K., Hartikainen, A-L, Pouta, A., Ripatti, S., Brodsky, J., et al. (2009). Genome-wide association analysis of metabolic traits in a birth cohort from a founder population. *Nat. Genet.*, 41, 35-46.

TABLE S9: List of FDR corrected genes/genetic regions identified by MGAS in the metabolic data

Color coding p-values: **red** <.000001  
**yellow** .000001-.00001  
**green** .00001-.0001  
**blue** .0001-.001  
black font .001-.05  
grey font >.05

| Symbol | MGAS PVal | IsSignificant | Chrom | Start_Position | Length | SNP       | GeneFeature | BMI     | CRP      | DBP    | GLU      | HDL      | INS     | LDL      | SBP     | TG       |
|--------|-----------|---------------|-------|----------------|--------|-----------|-------------|---------|----------|--------|----------|----------|---------|----------|---------|----------|
| CETP   | 2.64E-27  | TRUE          | 16    | 56995834       | 21923  | rs5882    | exonic      | 0.03337 | 0.2277   | 0.8921 | 0.7482   | 0.01234  | 0.6682  | 0.9856   | 0.7947  | 0.2581   |
| CETP   | -         | -             | -     | -              | -      | rs7499892 | intronic    | 0.05331 | 0.3716   | 0.2021 | 0.05806  | 2.29E-16 | 0.6125  | 0.8722   | 0.7906  | 0.6591   |
| CETP   | -         | -             | -     | -              | -      | rs1532624 | intronic    | 0.1196  | 0.3991   | 0.719  | 0.125    | 2.97E-22 | 0.08552 | 0.253    | 0.8547  | 0.01902  |
| CETP   | -         | -             | -     | -              | -      | rs3764261 | upstream    | 0.7867  | 0.2128   | 0.5447 | 0.2744   | 6.97E-29 | 0.5155  | 0.155    | 0.9677  | 0.07756  |
| CETP   | -         | -             | -     | -              | -      | rs4784744 | intronic    | 0.9047  | 0.2958   | 0.3813 | 0.6869   | 0.001547 | 0.01043 | 0.03085  | 0.64    | 0.009365 |
| CRP    | 4.79E-21  | TRUE          | 1     | 159682078      | 2302   | rs2794520 | downstream  | 0.5436  | 2.92E-22 | 0.5156 | 0.5865   | 0.2572   | 0.3577  | 0.544    | 0.2896  | 0.6739   |
| CRP    | -         | -             | -     | -              | -      | rs2808630 | downstream  | 0.7177  | 0.1592   | 0.6079 | 0.8536   | 0.4855   | 0.5051  | 0.6753   | 0.726   | 0.5424   |
| PSRC1  | 3.66E-11  | TRUE          | 1     | 109822175      | 3616   | rs646776  | downstream  | 0.1401  | 0.2212   | 0.6273 | 0.8053   | 0.1416   | 0.07783 | 2.19E-12 | 0.5509  | 0.5495   |
| PSRC1  | -         | -             | -     | -              | -      | rs14000   | 3UTR        | 0.1916  | 0.09687  | 0.0892 | 0.2581   | 0.6445   | 0.1435  | 0.1921   | 0.5668  | 0.6507   |
| CELSR2 | 1.07E-10  | TRUE          | 1     | 109792640      | 25739  | rs646776  | downstream  | 0.1401  | 0.2212   | 0.6273 | 0.8053   | 0.1416   | 0.07783 | 2.19E-12 | 0.5509  | 0.5495   |
| CELSR2 | -         | -             | -     | -              | -      | rs14000   | 3UTR        | 0.1916  | 0.09687  | 0.0892 | 0.2581   | 0.6445   | 0.1435  | 0.1921   | 0.5668  | 0.6507   |
| CELSR2 | -         | -             | -     | -              | -      | rs4970833 | intronic    | 0.4169  | 0.4745   | 0.903  | 0.1187   | 0.08689  | 0.957   | 1.80E-04 | 0.1492  | 0.006173 |
| CELSR2 | -         | -             | -     | -              | -      | rs585362  | upstream    | 0.4312  | 0.1302   | 0.9314 | 0.6189   | 0.1309   | 0.5631  | 7.88E-04 | 0.9039  | 0.254    |
| CELSR2 | -         | -             | -     | -              | -      | rs608196  | intronic    | 0.5951  | 0.02572  | 0.2761 | 0.2334   | 0.6895   | 0.5521  | 0.2932   | 0.824   | 0.7671   |
| CELSR2 | -         | -             | -     | -              | -      | rs611917  | intronic    | 0.62    | 0.9362   | 0.6067 | 0.2556   | 0.3181   | 0.4759  | 2.49E-07 | 0.7242  | 0.4669   |
| CELSR2 | -         | -             | -     | -              | -      | rs437444  | exonic      | 0.9746  | 0.01237  | 0.2472 | 0.07295  | 0.07532  | 0.5549  | 0.2433   | 0.03432 | 0.6468   |
| GCKR   | 9.72E-09  | TRUE          | 2     | 27719705       | 26846  | rs780090  | upstream    | 0.4083  | 0.6039   | 0.077  | 0.7938   | 0.9573   | 0.9804  | 0.001355 | 0.9441  | 0.001157 |
| GCKR   | -         | -             | -     | -              | -      | rs1260326 | exonic      | 0.492   | 0.07309  | 0.5136 | 0.3899   | 0.1862   | 0.4225  | 0.3074   | 0.3802  | 3.56E-10 |
| GCKR   | -         | -             | -     | -              | -      | rs780092  | intronic    | 0.7381  | 0.8739   | 0.9692 | 0.4828   | 0.2053   | 0.8628  | 0.605    | 0.4487  | 0.002774 |
| GCKR   | -         | -             | -     | -              | -      | rs780094  | intronic    | 0.8774  | 0.1497   | 0.3194 | 0.2858   | 0.3188   | 0.2942  | 0.494    | 0.1694  | 0.2486   |
| G6PC2  | 1.38E-08  | TRUE          | 2     | 169757749      | 8762   | rs3821117 | intronic    | 0.2223  | 0.485    | 0.7182 | 0.6035   | 0.4264   | 0.2869  | 0.7342   | 0.1685  | 0.9942   |
| G6PC2  | -         | -             | -     | -              | -      | rs560887  | intronic    | 0.6882  | 0.4081   | 0.9984 | 5.69E-10 | 0.7242   | 0.9469  | 0.5264   | 0.9864  | 0.5293   |
| G6PC2  | -         | -             | -     | -              | -      | rs491443  | downstream  | 0.7258  | 0.3268   | 0.4481 | 0.03655  | 0.7391   | 0.9486  | 0.9368   | 0.4742  | 0.668    |



|           |          |      |    |           |       |            |            |         |          |         |          |          |        |          |          |          |
|-----------|----------|------|----|-----------|-------|------------|------------|---------|----------|---------|----------|----------|--------|----------|----------|----------|
| HNF1A-AS1 | 2.48E-08 | TRUE | 12 | 121407640 | 2456  | rs2254779  | ncRNA      | 0.5124  | 0.1338   | 0.2373  | 0.9861   | 0.7389   | 0.9154 | 0.6181   | 0.2521   | 0.9738   |
| HNF1A-AS1 | -        | -    | -  | -         | -     | rs7953249  | downstream | 0.5548  | 1.44E-09 | 0.4425  | 0.9052   | 0.4757   | 0.5462 | 0.2955   | 0.6843   | 0.9386   |
| HNF1A     | 5.55E-08 | TRUE | 12 | 121416548 | 23767 | rs1169302  | intronic   | 0.3462  | 1.20E-07 | 0.8893  | 0.02727  | 0.1185   | 0.4196 | 0.3375   | 0.1404   | 0.7278   |
| HNF1A     | -        | -    | -  | -         | -     | rs2464196  | exonic     | 0.5168  | 4.78E-09 | 0.6792  | 0.8519   | 0.7413   | 0.2968 | 0.3052   | 0.6581   | 0.7054   |
| HNF1A     | -        | -    | -  | -         | -     | rs1169300  | intronic   | 0.6507  | 2.01E-09 | 0.6845  | 0.8948   | 0.8545   | 0.3737 | 0.1907   | 0.7302   | 0.6947   |
| HNF1A     | -        | -    | -  | -         | -     | rs735396   | intronic   | 0.7766  | 2.13E-07 | 0.939   | 0.9274   | 0.926    | 0.1533 | 0.1433   | 0.9335   | 0.2894   |
| HNF1A     | -        | -    | -  | -         | -     | rs1169307  | intronic   | 0.8254  | 2.76E-05 | 0.7082  | 0.7806   | 0.0823   | 0.7835 | 0.3745   | 0.813    | 0.9292   |
| C12orf43  | 1.30E-07 | TRUE | 12 | 121440224 | 14082 | rs12819210 | exonic     | 0.1806  | 0.09316  | 0.1123  | 0.3683   | 0.3577   | 0.5646 | 0.4985   | 0.4996   | 0.4686   |
| C12orf43  | -        | -    | -  | -         | -     | rs2464196  | exonic     | 0.5168  | 4.78E-09 | 0.6792  | 0.8519   | 0.7413   | 0.2968 | 0.3052   | 0.6581   | 0.7054   |
| C12orf43  | -        | -    | -  | -         | -     | rs735396   | intronic   | 0.7766  | 2.13E-07 | 0.939   | 0.9274   | 0.926    | 0.1533 | 0.1433   | 0.9335   | 0.2894   |
| C12orf43  | -        | -    | -  | -         | -     | rs1169307  | intronic   | 0.8254  | 2.76E-05 | 0.7082  | 0.7806   | 0.0823   | 0.7835 | 0.3745   | 0.813    | 0.9292   |
| DPEP3     | 2.58E-07 | TRUE | 16 | 68009565  | 4888  | rs255049   | intronic   | 0.361   | 0.994    | 0.9463  | 0.455    | 3.06E-08 | 0.686  | 0.2529   | 0.6297   | 0.13     |
| CTCF      | 2.79E-07 | TRUE | 16 | 67596309  | 76780 | rs6499137  | 3UTR       | 0.3175  | 0.604    | 0.4746  | 0.5039   | 2.20E-08 | 0.7461 | 0.9509   | 0.4758   | 0.9843   |
| CTCF      | -        | -    | -  | -         | -     | rs7191281  | intronic   | 0.4947  | 0.8051   | 0.07599 | 0.7332   | 7.72E-06 | 0.9608 | 0.4549   | 0.145    | 0.7895   |
| NUTF2     | 3.92E-07 | TRUE | 16 | 67880818  | 24402 | rs2271293  | intronic   | 0.897   | 0.8916   | 0.8827  | 0.1609   | 4.66E-08 | 0.1624 | 0.4117   | 0.5012   | 0.9857   |
| EDC4      | 6.16E-07 | TRUE | 16 | 67906925  | 11493 | rs2271293  | intronic   | 0.897   | 0.8916   | 0.8827  | 0.1609   | 4.66E-08 | 0.1624 | 0.4117   | 0.5012   | 0.9857   |
| EDC4      | -        | -    | -  | -         | -     | rs10468274 | upstream   | 0.937   | 0.8623   | 0.322   | 0.08282  | 3.56E-07 | 0.2608 | 0.3686   | 0.3434   | 0.6258   |
| NR1H3     | 6.21E-07 | TRUE | 11 | 47279467  | 11118 | rs2167079  | exonic     | 0.04661 | 0.02844  | 0.967   | 0.5867   | 0.1763   | 0.7056 | 0.1238   | 0.104    | 0.07277  |
| NR1H3     | -        | -    | -  | -         | -     | rs7120118  | intronic   | 0.0552  | 0.0234   | 0.8924  | 0.5608   | 3.57E-08 | 0.8093 | 0.1874   | 0.05825  | 0.08197  |
| NR1H3     | -        | -    | -  | -         | -     | rs11039149 | intronic   | 0.9772  | 0.09349  | 0.3054  | 0.009321 | 5.09E-04 | 0.5538 | 0.5083   | 0.1374   | 0.02265  |
| C16orf86  | 7.44E-07 | TRUE | 16 | 67700716  | 1946  | rs7187476  | intronic   | 0.8978  | 0.3838   | 0.2378  | 0.09445  | 8.84E-08 | 0.5415 | 0.383    | 0.09347  | 0.5264   |
| ENKD1     | 7.44E-07 | TRUE | 16 | 67696849  | 3780  | rs7187476  | intronic   | 0.8978  | 0.3838   | 0.2378  | 0.09445  | 8.84E-08 | 0.5415 | 0.383    | 0.09347  | 0.5264   |
| FHOD1     | 8.25E-07 | TRUE | 16 | 67263291  | 18135 | rs3852700  | intronic   | 0.1658  | 0.3847   | 0.2787  | 0.2168   | 9.71E-08 | 0.6705 | 0.9209   | 0.5501   | 0.394    |
| FHOD1     | -        | -    | -  | -         | -     | rs7196989  | intronic   | 0.1727  | 0.4299   | 0.2849  | 0.2615   | 1.51E-07 | 0.7042 | 0.8385   | 0.5127   | 0.4318   |
| APOB      | 1.13E-06 | TRUE | 2  | 21224300  | 42646 | rs1713222  | upstream   | 0.2007  | 0.9986   | 0.09599 | 0.9239   | 0.4318   | 0.197  | 9.33E-08 | 0.07737  | 0.842    |
| APOB      | -        | -    | -  | -         | -     | rs673548   | intronic   | 0.3226  | 0.1194   | 0.9773  | 0.09501  | 3.40E-06 | 0.8316 | 2.28E-07 | 0.4084   | 2.01E-08 |
| APOB      | -        | -    | -  | -         | -     | rs676210   | exonic     | 0.3302  | 0.115    | 0.9899  | 0.1007   | 4.78E-06 | 0.8192 | 2.60E-07 | 0.4213   | 3.36E-08 |
| APOB      | -        | -    | -  | -         | -     | rs1801701  | exonic     | 0.4387  | 0.05612  | 0.3321  | 0.7412   | 0.5346   | 0.626  | 0.01127  | 0.009603 | 0.3052   |
| APOB      | -        | -    | -  | -         | -     | rs679899   | exonic     | 0.5144  | 0.9024   | 0.2513  | 0.8477   | 0.02394  | 0.3973 | 0.9247   | 0.1702   | 0.1086   |
| APOB      | -        | -    | -  | -         | -     | rs550619   | intronic   | 0.5415  | 0.6963   | 0.7224  | 0.8093   | 0.2593   | 0.7013 | 0.06421  | 0.8872   | 0.7822   |
| APOB      | -        | -    | -  | -         | -     | rs1042031  | exonic     | 0.7497  | 0.9532   | 0.03983 | 0.5051   | 0.3252   | 0.2155 | 0.2249   | 0.3996   | 0.05475  |
| APOB      | -        | -    | -  | -         | -     | rs693      | exonic     | 0.7777  | 0.7209   | 0.1151  | 0.4707   | 0.4173   | 0.6898 | 0.4354   | 0.7779   | 0.7897   |
| TMEM208   | 1.27E-06 | TRUE | 16 | 67261015  | 2168  | rs7196989  | intronic   | 0.1727  | 0.4299   | 0.2849  | 0.2615   | 1.51E-07 | 0.7042 | 0.8385   | 0.5127   | 0.4318   |

|           |          |      |    |          |       |            |          |         |          |        |          |          |         |          |         |          |
|-----------|----------|------|----|----------|-------|------------|----------|---------|----------|--------|----------|----------|---------|----------|---------|----------|
| LRRC29    | 1.27E-06 | TRUE | 16 | 67241041 | 19681 | rs7196989  | intronic | 0.1727  | 0.4299   | 0.2849 | 0.2615   | 1.51E-07 | 0.7042  | 0.8385   | 0.5127  | 0.4318   |
| EXOC3L1   | 1.38E-06 | TRUE | 16 | 67218281 | 5827  | rs868213   | intronic | 0.1796  | 0.399    | 0.3079 | 0.2276   | 1.64E-07 | 0.6852  | 0.8226   | 0.5289  | 0.4248   |
| PARD6A    | 1.42E-06 | TRUE | 16 | 67694850 | 1832  | rs6979     | exonic   | 0.7718  | 0.6939   | 0.7108 | 0.08113  | 0.0283   | 0.5256  | 0.2619   | 0.4855  | 0.1681   |
| PARD6A    | -        | -    | -  | -        | -     | rs7187476  | intronic | 0.8978  | 0.3838   | 0.2378 | 0.09445  | 8.84E-08 | 0.5415  | 0.383    | 0.09347 | 0.5264   |
| NOL3      | 1.45E-06 | TRUE | 16 | 67204399 | 5242  | rs2233455  | exonic   | 0.134   | 0.4108   | 0.1971 | 0.2326   | 1.72E-07 | 0.5636  | 0.9906   | 0.5565  | 0.4772   |
| HSF4      | 1.45E-06 | TRUE | 16 | 67197287 | 6562  | rs2233455  | exonic   | 0.134   | 0.4108   | 0.1971 | 0.2326   | 1.72E-07 | 0.5636  | 0.9906   | 0.5565  | 0.4772   |
| TOMM40    | 1.47E-06 | TRUE | 19 | 45394476 | 12471 | rs405509   | upstream | 0.2693  | 0.7263   | 0.564  | 0.2019   | 0.4985   | 0.9087  | 0.668    | 0.4623  | 0.6398   |
| TOMM40    | -        | -    | -  | -        | -     | rs8106922  | intronic | 0.7305  | 6.64E-05 | 0.4315 | 0.3706   | 0.03617  | 0.9033  | 0.2162   | 0.7173  | 0.8568   |
| TOMM40    | -        | -    | -  | -        | -     | rs157580   | intronic | 0.8084  | 0.3781   | 0.2169 | 0.3004   | 0.001642 | 0.7381  | 4.96E-08 | 0.8885  | 8.61E-04 |
| TOMM40    | -        | -    | -  | -        | -     | rs2075650  | intronic | 0.9345  | 0.004446 | 0.3169 | 0.7306   | 0.1825   | 0.4913  | 1.05E-05 | 0.4625  | 1.81E-05 |
| KIAA0895L | 1.48E-06 | TRUE | 16 | 67209504 | 8380  | rs2233455  | exonic   | 0.134   | 0.4108   | 0.1971 | 0.2326   | 1.72E-07 | 0.5636  | 0.9906   | 0.5565  | 0.4772   |
| KIAA0895L | -        | -    | -  | -        | -     | rs868213   | intronic | 0.1796  | 0.399    | 0.3079 | 0.2276   | 1.64E-07 | 0.6852  | 0.8226   | 0.5289  | 0.4248   |
| PRMT7     | 1.49E-06 | TRUE | 16 | 68344876 | 46294 | rs3743742  | intronic | 0.274   | 0.4489   | 0.5809 | 0.3548   | 0.01252  | 0.6735  | 0.4857   | 0.5307  | 0.3085   |
| PRMT7     | -        | -    | -  | -        | -     | rs3803650  | exonic   | 0.2847  | 0.2419   | 0.7827 | 0.6362   | 0.01556  | 0.7769  | 0.891    | 0.7625  | 0.2056   |
| PRMT7     | -        | -    | -  | -        | -     | rs1111571  | intronic | 0.3669  | 0.2148   | 0.8728 | 0.3225   | 0.03644  | 0.7666  | 0.5186   | 0.6334  | 0.8972   |
| PRMT7     | -        | -    | -  | -        | -     | rs3785123  | intronic | 0.3996  | 0.6257   | 0.5531 | 0.771    | 0.07176  | 0.8639  | 0.7268   | 0.4931  | 0.7163   |
| PRMT7     | -        | -    | -  | -        | -     | rs3961282  | intronic | 0.4055  | 0.1729   | 0.7639 | 0.3206   | 0.04415  | 0.8176  | 0.5158   | 0.5594  | 0.9506   |
| PRMT7     | -        | -    | -  | -        | -     | rs4783554  | intronic | 0.4801  | 0.1867   | 0.9942 | 0.5747   | 0.02467  | 0.9468  | 0.5136   | 0.5837  | 0.859    |
| PRMT7     | -        | -    | -  | -        | -     | rs8058517  | intronic | 0.9079  | 0.2653   | 0.6002 | 0.4823   | 4.37E-08 | 0.8073  | 0.9179   | 0.7823  | 0.3082   |
| MADD      | 1.50E-06 | TRUE | 11 | 47291198 | 60385 | rs326217   | exonic   | 0.01679 | 0.4316   | 0.6365 | 0.02206  | 0.07119  | 0.3848  | 0.2229   | 0.2298  | 0.9868   |
| MADD      | -        | -    | -  | -        | -     | rs7120118  | intronic | 0.0552  | 0.0234   | 0.8924 | 0.5608   | 3.57E-08 | 0.8093  | 0.1874   | 0.05825 | 0.08197  |
| MADD      | -        | -    | -  | -        | -     | rs2290149  | intronic | 0.1168  | 0.01191  | 0.3215 | 0.7586   | 0.009796 | 0.09805 | 0.00883  | 0.3908  | 0.1096   |
| MADD      | -        | -    | -  | -        | -     | rs4752979  | intronic | 0.133   | 0.3565   | 0.7863 | 0.9002   | 1.49E-05 | 0.5598  | 0.841    | 0.2174  | 0.3536   |
| MADD      | -        | -    | -  | -        | -     | rs4752977  | intronic | 0.2809  | 0.4936   | 0.6932 | 0.452    | 9.72E-06 | 0.4263  | 0.4551   | 0.3559  | 0.3833   |
| MADD      | -        | -    | -  | -        | -     | rs1051006  | exonic   | 0.2949  | 0.4965   | 0.677  | 0.4561   | 0.3127   | 0.418   | 0.4624   | 0.3432  | 0.3799   |
| MADD      | -        | -    | -  | -        | -     | rs749067   | intronic | 0.9067  | 0.1021   | 0.6539 | 0.004536 | 3.01E-05 | 0.552   | 0.8723   | 0.4897  | 0.06264  |
| PLA2G15   | 1.65E-06 | TRUE | 16 | 68279246 | 15716 | rs1975802  | intronic | 0.4813  | 0.8637   | 0.557  | 0.7194   | 1.95E-07 | 0.8525  | 0.2248   | 0.6508  | 0.2139   |
| DPEP2     | 1.98E-06 | TRUE | 16 | 68021292 | 12130 | rs255052   | intronic | 0.4782  | 0.8888   | 0.6575 | 0.6429   | 2.36E-07 | 0.669   | 0.2896   | 0.4469  | 0.3692   |
| NRN1L     | 3.00E-06 | TRUE | 16 | 67918780 | 1492  | rs10468274 | upstream | 0.937   | 0.8623   | 0.322  | 0.08282  | 3.56E-07 | 0.2608  | 0.3686   | 0.3434  | 0.6258   |
| PVRL2     | 3.04E-06 | TRUE | 19 | 45349392 | 32807 | rs1871047  | intronic | 0.1248  | 0.3252   | 0.9286 | 0.02019  | 0.08085  | 0.3568  | 0.7368   | 0.2255  | 0.08093  |
| PVRL2     | -        | -    | -  | -        | -     | rs377702   | intronic | 0.1839  | 0.6437   | 0.326  | 0.5283   | 0.7807   | 0.8546  | 0.2287   | 0.3657  | 0.433    |
| PVRL2     | -        | -    | -  | -        | -     | rs4803766  | intronic | 0.2928  | 0.55     | 0.9738 | 0.883    | 0.9175   | 0.1381  | 0.716    | 0.07416 | 0.09686  |
| PVRL2     | -        | -    | -  | -        | -     | rs6859     | 3UTR     | 0.2988  | 0.1659   | 0.5211 | 0.03266  | 0.05445  | 0.4336  | 0.01207  | 0.4281  | 0.6264   |

|        |          |      |    |           |        |            |            |                 |                 |         |                |                 |                |                 |        |                 |
|--------|----------|------|----|-----------|--------|------------|------------|-----------------|-----------------|---------|----------------|-----------------|----------------|-----------------|--------|-----------------|
| PVRL2  | -        | -    | -  | -         | -      | rs2075642  | intronic   | 0.4624          | 0.1421          | 0.3262  | 0.3212         | 0.4169          | 0.454          | 0.07954         | 0.4881 | 0.08497         |
| PVRL2  | -        | -    | -  | -         | -      | rs11667640 | intronic   | 0.4703          | 0.7964          | 0.3047  | 0.8687         | 0.9642          | 0.8738         | 0.7322          | 0.5229 | 0.7691          |
| PVRL2  | -        | -    | -  | -         | -      | rs157580   | intronic   | 0.8084          | 0.3781          | 0.2169  | 0.3004         | <b>0.001642</b> | 0.7381         | <b>4.96E-08</b> | 0.8885 | <b>8.61E-04</b> |
| PVRL2  | -        | -    | -  | -         | -      | rs2075650  | intronic   | 0.9345          | <b>0.004446</b> | 0.3169  | 0.7306         | 0.1825          | 0.4913         | <b>1.05E-05</b> | 0.4625 | <b>1.81E-05</b> |
| PSKH1  | 6.07E-06 | TRUE | 16 | 67927174  | 36408  | rs12599580 | intronic   | 0.9314          | 0.5048          | 0.3158  | 0.7402         | 0.8556          | 0.4018         | 0.6161          | 0.1704 | 0.563           |
| PSKH1  | -        | -    | -  | -         | -      | rs10468274 | upstream   | 0.937           | 0.8623          | 0.322   | 0.08282        | <b>3.56E-07</b> | 0.2608         | 0.3686          | 0.3434 | 0.6258          |
| CTCFL  | 7.96E-06 | TRUE | 20 | 56093554  | 6630   | rs2902991  | downstream | 0.1626          | 0.1221          | 0.5357  | 0.1721         | 0.6693          | 0.7378         | 0.05563         | 0.4624 | 0.9749          |
| CTCFL  | -        | -    | -  | -         | -      | rs2865387  | downstream | 0.3611          | 0.5227          | 0.9577  | 0.1151         | 0.8907          | 0.9392         | 0.1316          | 0.8262 | 0.7117          |
| CTCFL  | -        | -    | -  | -         | -      | rs11700100 | intronic   | 0.4982          | 0.9208          | 0.9785  | 0.667          | <b>1.61E-07</b> | 0.2883         | 0.457           | 0.9458 | 0.5406          |
| CTCFL  | -        | -    | -  | -         | -      | rs6025606  | exonic     | 0.5986          | 0.3143          | 0.9189  | 0.7903         | 0.7312          | 0.7929         | 0.3923          | 0.7978 | 0.3028          |
| CTCFL  | -        | -    | -  | -         | -      | rs12625924 | intronic   | 0.6118          | 0.1517          | 0.1306  | 0.8342         | 0.9064          | 0.5792         | 0.1079          | 0.3213 | 0.8778          |
| CTCFL  | -        | -    | -  | -         | -      | rs12106016 | upstream   | 0.8154          | 0.0653          | 0.1938  | 0.1883         | 0.3119          | 0.7773         | 0.6438          | 0.7417 | 0.4654          |
| CTCFL  | -        | -    | -  | -         | -      | rs6025590  | downstream | 0.9559          | 0.6856          | 0.9684  | 0.6225         | 0.6592          | 0.9411         | <b>0.04896</b>  | 0.7404 | 0.977           |
| AR     | 8.49E-06 | TRUE | X  | 66788682  | 161780 | rs5031002  | intronic   | 0.1203          | 0.5493          | 0.8535  | 0.5407         | 0.6375          | <b>0.03562</b> | <b>2.37E-07</b> | 0.7995 | 0.09491         |
| AR     | -        | -    | -  | -         | -      | rs12014709 | intronic   | 0.4449          | 0.2966          | 0.4357  | 0.387          | 0.4634          | <b>0.01782</b> | 0.7424          | 0.354  | 0.3188          |
| AR     | -        | -    | -  | -         | -      | rs1337080  | intronic   | 0.6287          | 0.524           | 0.9748  | 0.901          | 0.7529          | 0.2924         | 0.874           | 0.9389 | 0.6503          |
| AR     | -        | -    | -  | -         | -      | rs4827545  | intronic   | 0.8437          | 0.8471          | 0.4232  | 0.6265         | 0.4827          | <b>0.01961</b> | 0.8713          | 0.4208 | 0.296           |
| AR     | -        | -    | -  | -         | -      | rs5918760  | intronic   | 0.9207          | 0.7999          | 0.5648  | 0.4695         | 0.4571          | <b>0.01636</b> | 0.8925          | 0.5034 | 0.2908          |
| AR     | -        | -    | -  | -         | -      | rs5918762  | intronic   | 0.9219          | 0.7404          | 0.6815  | 0.5977         | 0.4623          | <b>0.01802</b> | 0.8591          | 0.4948 | 0.3132          |
| AR     | -        | -    | -  | -         | -      | rs12396249 | intronic   | 0.9392          | 0.7706          | 0.5242  | 0.5048         | 0.4954          | <b>0.01812</b> | 0.9013          | 0.4516 | 0.3194          |
| AR     | -        | -    | -  | -         | -      | rs2255702  | intronic   | 0.9445          | 0.807           | 0.5542  | 0.5187         | 0.4938          | <b>0.02112</b> | 0.8691          | 0.4871 | 0.3884          |
| AR     | -        | -    | -  | -         | -      | rs5919393  | intronic   | 0.9482          | 0.8125          | 0.5946  | 0.5814         | 0.4862          | <b>0.01892</b> | 0.9775          | 0.4908 | 0.4019          |
| AR     | -        | -    | -  | -         | -      | rs5918757  | intronic   | 0.9741          | 0.7796          | 0.5218  | 0.5068         | 0.501           | <b>0.01825</b> | 0.8936          | 0.4612 | 0.3196          |
| NFATC3 | 1.29E-05 | TRUE | 16 | 68119268  | 143895 | rs7190307  | intronic   | 0.07625         | 0.7489          | 0.5496  | 0.8538         | 0.05021         | 0.2247         | 0.5814          | 0.7409 | 0.807           |
| NFATC3 | -        | -    | -  | -         | -      | rs2418736  | intronic   | 0.2063          | 0.5242          | 0.6792  | 0.2401         | <b>8.20E-07</b> | 0.3154         | 0.1946          | 0.9375 | 0.2773          |
| NFATC3 | -        | -    | -  | -         | -      | rs4359427  | intronic   | 0.2127          | 0.896           | 0.5135  | 0.1745         | <b>8.21E-07</b> | 0.3812         | 0.3413          | 0.5929 | 0.4306          |
| NFATC3 | -        | -    | -  | -         | -      | rs9932251  | intronic   | 0.2187          | 0.8761          | 0.5749  | 0.1691         | <b>7.49E-07</b> | 0.3608         | 0.3065          | 0.6827 | 0.4313          |
| NFATC3 | -        | -    | -  | -         | -      | rs12598    | exonic     | 0.3372          | 0.4047          | 0.5357  | 0.6799         | 0.6527          | 0.1984         | 0.3843          | 0.314  | 0.6151          |
| NFATC3 | -        | -    | -  | -         | -      | rs7193701  | intronic   | 0.4671          | 0.9677          | 0.54    | 0.7222         | <b>3.87E-07</b> | 0.8884         | 0.2406          | 0.7283 | 0.1849          |
| CR1L   | 1.44E-05 | TRUE | 1  | 207818457 | 78580  | rs4844614  | intronic   | <b>3.93E-04</b> | 0.6738          | 0.05741 | 0.2787         | 0.06369         | 0.07123        | <b>2.38E-07</b> | 0.2643 | <b>0.003801</b> |
| CR1L   | -        | -    | -  | -         | -      | rs10494884 | intronic   | <b>0.03029</b>  | 0.2476          | 0.6795  | 0.3309         | 0.1463          | 0.3309         | <b>0.004375</b> | 0.1447 | 0.1018          |
| CR1L   | -        | -    | -  | -         | -      | rs10779339 | 3UTR       | <b>0.03386</b>  | 0.4428          | 0.6228  | 0.3817         | 0.1414          | 0.4658         | <b>0.00726</b>  | 0.2465 | 0.08688         |
| CR1L   | -        | -    | -  | -         | -      | rs12080578 | intronic   | <b>0.04034</b>  | 0.1241          | 0.6667  | <b>0.01845</b> | <b>0.008374</b> | 0.3558         | <b>0.005604</b> | 0.899  | <b>0.002726</b> |

|         |          |      |    |           |       |            |          |                 |                 |                 |                |                |                |                 |                 |                 |
|---------|----------|------|----|-----------|-------|------------|----------|-----------------|-----------------|-----------------|----------------|----------------|----------------|-----------------|-----------------|-----------------|
| CR1L    | -        | -    | -  | -         | -     | rs11118387 | intronic | 0.06218         | 0.5264          | 0.6856          | 0.3614         | 0.2198         | 0.3516         | <b>0.006691</b> | 0.2118          | 0.1064          |
| CR1L    | -        | -    | -  | -         | -     | rs2761424  | intronic | 0.1591          | 0.922           | 0.4849          | 0.8078         | <b>0.04714</b> | 0.8984         | 0.783           | <b>0.03793</b>  | 0.2898          |
| CR1L    | -        | -    | -  | -         | -     | rs10863461 | intronic | 0.2915          | 0.7668          | 0.6063          | 0.8308         | 0.8778         | 0.7623         | 0.122           | 0.1774          | 0.9948          |
| CR1L    | -        | -    | -  | -         | -     | rs6696840  | intronic | 0.3303          | 0.8839          | 0.6872          | 0.7391         | 0.9048         | 0.7815         | 0.1487          | 0.2026          | 0.719           |
| CR1L    | -        | -    | -  | -         | -     | rs1998539  | intronic | 0.8557          | 0.5431          | 0.6009          | 0.872          | 0.725          | 0.1092         | 0.7893          | <b>0.02516</b>  | 0.4884          |
| CR1L    | -        | -    | -  | -         | -     | rs11118475 | intronic | 0.8954          | 0.8329          | 0.5601          | 0.9211         | 0.8348         | 0.2582         | 0.6501          | <b>0.0394</b>   | 0.6854          |
| OASL    | 1.44E-05 | TRUE | 12 | 121458094 | 18952 | rs10774580 | intronic | 0.09104         | <b>4.97E-07</b> | 0.1349          | 0.6109         | 0.3377         | 0.3766         | 0.9154          | <b>0.04601</b>  | 0.7461          |
| OASL    | -        | -    | -  | -         | -     | rs12819210 | exonic   | 0.1806          | 0.09316         | 0.1123          | 0.3683         | 0.3577         | 0.5646         | 0.4985          | 0.4996          | 0.4686          |
| OASL    | -        | -    | -  | -         | -     | rs7965349  | intronic | 0.2528          | <b>9.29E-04</b> | 0.3498          | 0.5059         | 0.2891         | 0.4456         | 0.09535         | 0.4228          | 0.2227          |
| OASL    | -        | -    | -  | -         | -     | rs2859394  | upstream | 0.7846          | 0.06544         | 0.4525          | 0.6604         | 0.8046         | 0.1936         | 0.2813          | 0.6025          | 0.3758          |
| S1PR2   | 1.47E-05 | TRUE | 19 | 10332108  | 9841  | rs2288937  | intronic | 0.6039          | 0.2611          | 0.2739          | <b>0.02735</b> | 0.6087         | 0.391          | <b>0.009269</b> | 0.2712          | 0.09111         |
| S1PR2   | -        | -    | -  | -         | -     | rs2116941  | 3UTR     | 0.6523          | 0.6345          | 0.3823          | 0.3754         | 0.7905         | 0.3436         | 0.08409         | 0.5394          | 0.2908          |
| S1PR2   | -        | -    | -  | -         | -     | rs10409243 | 3UTR     | 0.9912          | 0.3927          | 0.06374         | 0.5824         | 0.2796         | 0.6106         | <b>6.23E-07</b> | 0.2241          | <b>0.04488</b>  |
| TFAP2B  | 1.81E-05 | TRUE | 6  | 50786438  | 28889 | rs987237   | intronic | <b>7.37E-07</b> | <b>4.17E-04</b> | 0.1634          | 0.2221         | <b>0.01615</b> | <b>0.01493</b> | 0.3143          | <b>0.02494</b>  | <b>0.003847</b> |
| TFAP2B  | -        | -    | -  | -         | -     | rs6930924  | intronic | 0.2443          | 0.2082          | 0.5596          | 0.491          | 0.4341         | 0.05227        | 0.1029          | 0.6772          | 0.1102          |
| TFAP2B  | -        | -    | -  | -         | -     | rs2143081  | upstream | 0.2492          | 0.1208          | 0.9772          | 0.4722         | 0.0955         | 0.252          | 0.4908          | 0.9793          | 0.6482          |
| MIR1908 | 3.40E-05 | TRUE | 11 | 61582632  | 81    | rs174556   | intronic | 0.798           | 0.5286          | 0.9724          | 0.1236         | 0.1947         | 0.2193         | <b>4.04E-06</b> | 0.5532          | 0.0737          |
| FADS1   | 4.46E-05 | TRUE | 11 | 61567096  | 17434 | rs174546   | 3UTR     | 0.4424          | 0.7667          | 0.8104          | 0.1885         | 0.0566         | 0.3892         | <b>6.38E-06</b> | 0.4388          | <b>0.01346</b>  |
| FADS1   | -        | -    | -  | -         | -     | rs174556   | intronic | 0.798           | 0.5286          | 0.9724          | 0.1236         | 0.1947         | 0.2193         | <b>4.04E-06</b> | 0.5532          | 0.0737          |
| SMEK2   | 5.67E-05 | TRUE | 2  | 55774427  | 70434 | rs2627763  | intronic | <b>0.01983</b>  | 0.6394          | <b>0.00307</b>  | 0.3014         | 0.6473         | 0.3315         | 0.2034          | 0.1507          | 0.7042          |
| SMEK2   | -        | -    | -  | -         | -     | rs782588   | intronic | 0.1469          | <b>0.008509</b> | <b>0.00147</b>  | 0.0995         | 0.3175         | 0.5432         | 0.8834          | <b>1.23E-06</b> | 0.6248          |
| SMEK2   | -        | -    | -  | -         | -     | rs782586   | intronic | 0.168           | <b>0.007237</b> | <b>0.001385</b> | 0.08265        | 0.3724         | 0.4546         | 0.8069          | <b>1.20E-06</b> | 0.6219          |
| SMEK2   | -        | -    | -  | -         | -     | rs782602   | upstream | 0.1705          | 0.2558          | <b>0.001049</b> | 0.1916         | 0.9432         | 0.4937         | 0.6655          | <b>8.02E-07</b> | 0.6299          |
| SMEK2   | -        | -    | -  | -         | -     | rs2291336  | upstream | 0.1726          | 0.2719          | 0.2915          | 0.05676        | 0.5375         | 0.5128         | 0.9997          | <b>1.21E-04</b> | 0.7705          |
| SMEK2   | -        | -    | -  | -         | -     | rs10496050 | intronic | 0.3345          | <b>0.006622</b> | <b>0.003577</b> | 0.1598         | 0.1765         | 0.4943         | 0.6935          | <b>1.28E-05</b> | 0.8011          |
| SMEK2   | -        | -    | -  | -         | -     | rs3748945  | 3UTR     | 0.339           | 0.2775          | <b>0.02443</b>  | 0.9764         | 0.9899         | 0.9396         | 0.6134          | 0.1259          | 0.6494          |
| SMEK2   | -        | -    | -  | -         | -     | rs10427222 | intronic | 0.381           | <b>0.03238</b>  | <b>0.008004</b> | 0.651          | 0.29           | 0.8509         | 0.5896          | 0.07188         | 0.9988          |
| SMEK2   | -        | -    | -  | -         | -     | rs6737995  | intronic | 0.4262          | <b>0.03441</b>  | 0.4462          | 0.1047         | 0.6194         | 0.3782         | 0.2829          | <b>1.00E-03</b> | 0.9198          |
| SMEK2   | -        | -    | -  | -         | -     | rs12993624 | intronic | 0.6212          | 0.1743          | 0.3093          | <b>0.02992</b> | 0.4416         | 0.3897         | 0.2676          | <b>3.08E-04</b> | 0.8914          |
| SMEK2   | -        | -    | -  | -         | -     | rs13010217 | intronic | 0.6874          | 0.6947          | 0.3261          | <b>0.04681</b> | 0.183          | 0.346          | 0.6662          | <b>5.40E-04</b> | 0.6939          |
| SMEK2   | -        | -    | -  | -         | -     | rs10496047 | intronic | 0.8104          | 0.2121          | 0.4451          | 0.6791         | 0.8864         | 0.6734         | 0.888           | 0.9184          | 0.7099          |
| SMEK2   | -        | -    | -  | -         | -     | rs6545508  | intronic | 0.8259          | <b>0.002266</b> | 0.3053          | 0.3065         | 0.9521         | 0.6174         | 0.1362          | 0.06501         | 0.2794          |
| SMEK2   | -        | -    | -  | -         | -     | rs10496048 | intronic | 0.8853          | <b>0.005556</b> | 0.6735          | 0.5537         | 0.2977         | 0.8406         | 0.1577          | 0.3762          | 0.5423          |

|         |          |      |    |          |        |            |            |         |          |          |          |         |        |          |          |         |
|---------|----------|------|----|----------|--------|------------|------------|---------|----------|----------|----------|---------|--------|----------|----------|---------|
| LEPR    | 5.96E-05 | TRUE | 1  | 65991371 | 109741 | rs3806318  | upstream   | 0.07325 | 0.2579   | 0.4602   | 0.416    | 0.107   | 0.1215 | 0.9253   | 0.8748   | 0.06341 |
| LEPR    | -        | -    | -  | -        | -      | rs3828034  | intronic   | 0.1145  | 0.01439  | 0.7584   | 0.286    | 0.9196  | 0.5411 | 0.6851   | 0.7409   | 0.3264  |
| LEPR    | -        | -    | -  | -        | -      | rs1022981  | intronic   | 0.15    | 0.01186  | 0.3157   | 0.6603   | 0.2159  | 0.3539 | 0.5367   | 0.04135  | 0.1409  |
| LEPR    | -        | -    | -  | -        | -      | rs1782754  | intronic   | 0.1585  | 0.01166  | 0.2606   | 0.7189   | 0.2462  | 0.3611 | 0.4894   | 0.03281  | 0.1415  |
| LEPR    | -        | -    | -  | -        | -      | rs1171269  | intronic   | 0.1605  | 0.012    | 0.277    | 0.6478   | 0.2379  | 0.3666 | 0.5619   | 0.03656  | 0.1684  |
| LEPR    | -        | -    | -  | -        | -      | rs4655537  | intronic   | 0.193   | 0.003228 | 0.2469   | 0.28     | 0.731   | 0.3657 | 0.9505   | 0.009924 | 0.8233  |
| LEPR    | -        | -    | -  | -        | -      | rs10493380 | intronic   | 0.1954  | 0.009921 | 0.9301   | 0.481    | 0.8365  | 0.7819 | 0.4324   | 0.9011   | 0.3406  |
| LEPR    | -        | -    | -  | -        | -      | rs1137100  | exonic     | 0.2482  | 0.005778 | 0.2761   | 0.9265   | 0.155   | 0.447  | 0.7622   | 0.04746  | 0.1424  |
| LEPR    | -        | -    | -  | -        | -      | rs2025805  | intronic   | 0.2885  | 0.001495 | 0.2606   | 0.9794   | 0.6511  | 0.6925 | 0.5844   | 0.1556   | 0.3145  |
| LEPR    | -        | -    | -  | -        | -      | rs970467   | intronic   | 0.3452  | 0.7653   | 0.3539   | 0.8281   | 0.7636  | 0.9383 | 0.9685   | 0.1961   | 0.7154  |
| LEPR    | -        | -    | -  | -        | -      | rs9436297  | intronic   | 0.3765  | 0.2146   | 0.7122   | 0.3677   | 0.8321  | 0.8844 | 0.5789   | 0.4112   | 0.4792  |
| LEPR    | -        | -    | -  | -        | -      | rs12409877 | intronic   | 0.4008  | 0.003603 | 0.09787  | 0.6312   | 0.5767  | 0.949  | 0.7449   | 0.01797  | 0.8755  |
| LEPR    | -        | -    | -  | -        | -      | rs3790426  | intronic   | 0.4457  | 0.135    | 0.8522   | 0.4159   | 0.06904 | 0.5273 | 0.2814   | 0.8373   | 0.6003  |
| LEPR    | -        | -    | -  | -        | -      | rs6588147  | intronic   | 0.5311  | 0.004121 | 0.007698 | 0.9679   | 0.5587  | 0.8864 | 0.9255   | 0.003467 | 0.8901  |
| LEPR    | -        | -    | -  | -        | -      | rs6673324  | intronic   | 0.6033  | 0.1814   | 0.3964   | 0.5984   | 0.7639  | 0.7843 | 0.3339   | 0.112    | 0.3272  |
| LEPR    | -        | -    | -  | -        | -      | rs1171279  | intronic   | 0.7402  | 0.46     | 0.2002   | 0.3526   | 0.5992  | 0.7722 | 0.2958   | 0.2528   | 0.531   |
| LEPR    | -        | -    | -  | -        | -      | rs3790433  | intronic   | 0.799   | 0.6308   | 0.08339  | 0.4571   | 0.4888  | 0.8525 | 0.4068   | 0.08519  | 0.213   |
| LEPR    | -        | -    | -  | -        | -      | rs2154380  | intronic   | 0.8103  | 0.272    | 0.1032   | 0.7733   | 0.9332  | 0.6799 | 0.6875   | 0.009193 | 0.8372  |
| LEPR    | -        | -    | -  | -        | -      | rs1892534  | downstream | 0.8243  | 4.77E-07 | 0.497    | 0.3704   | 0.2597  | 0.7034 | 0.3746   | 0.3003   | 0.9436  |
| LEPR    | -        | -    | -  | -        | -      | rs10158579 | intronic   | 0.8359  | 0.7728   | 0.2495   | 0.3705   | 0.8163  | 0.6613 | 0.8011   | 0.05447  | 0.1116  |
| LEPR    | -        | -    | -  | -        | -      | rs1137101  | exonic     | 0.8748  | 0.2595   | 0.1106   | 0.7626   | 0.8924  | 0.7602 | 0.7227   | 0.008566 | 0.7423  |
| LEPR    | -        | -    | -  | -        | -      | rs1171278  | intronic   | 1       | 0.9624   | 0.8095   | 0.9637   | 0.8363  | 0.8687 | 0.9845   | 0.2978   | 0.0888  |
| GLT8D1  | 6.59E-05 | TRUE | 3  | 52728499 | 11601  | rs6976     | 3UTR       | 0.9028  | 0.1491   | 0.2448   | 6.47E-06 | 0.8249  | 0.2806 | 0.5525   | 0.4594   | 0.7002  |
| GLT8D1  | -        | -    | -  | -        | -      | rs6762813  | intronic   | 0.9693  | 0.8074   | 0.8957   | 0.004707 | 0.4603  | 0.5976 | 1.30E-04 | 0.5094   | 0.6592  |
| GLT8D1  | -        | -    | -  | -        | -      | rs2289247  | exonic     | 0.9737  | 0.9694   | 0.8093   | 0.007429 | 0.4166  | 0.5671 | 1.75E-04 | 0.5575   | 0.6664  |
| SNORD69 | 6.59E-05 | TRUE | 3  | 52726751 | 78     | rs6976     | 3UTR       | 0.9028  | 0.1491   | 0.2448   | 6.47E-06 | 0.8249  | 0.2806 | 0.5525   | 0.4594   | 0.7002  |
| SNORD69 | -        | -    | -  | -        | -      | rs6762813  | intronic   | 0.9693  | 0.8074   | 0.8957   | 0.004707 | 0.4603  | 0.5976 | 1.30E-04 | 0.5094   | 0.6592  |
| SNORD69 | -        | -    | -  | -        | -      | rs2289247  | exonic     | 0.9737  | 0.9694   | 0.8093   | 0.007429 | 0.4166  | 0.5671 | 1.75E-04 | 0.5575   | 0.6664  |
| FAM222B | 7.07E-05 | TRUE | 17 | 27082995 | 86863  | rs11658900 | intronic   | 0.03707 | 0.8323   | 0.3279   | 0.3161   | 0.05639 | 0.1982 | 4.54E-04 | 0.9439   | 0.02269 |
| FAM222B | -        | -    | -  | -        | -      | rs4795457  | intronic   | 0.04174 | 0.01954  | 0.2237   | 0.1416   | 0.6815  | 0.6314 | 3.28E-06 | 0.005963 | 0.2035  |
| FAM222B | -        | -    | -  | -        | -      | rs9303621  | intronic   | 0.04495 | 0.02207  | 0.2432   | 0.1502   | 0.6754  | 0.6313 | 2.84E-06 | 0.006871 | 0.2239  |
| FAM222B | -        | -    | -  | -        | -      | rs2043031  | exonic     | 0.04904 | 0.01705  | 0.2421   | 0.1279   | 0.7106  | 0.6429 | 3.65E-06 | 0.006623 | 0.2206  |
| FAM222B | -        | -    | -  | -        | -      | rs4795461  | intronic   | 0.3649  | 0.4691   | 0.8632   | 0.5642   | 0.1563  | 0.9859 | 0.8111   | 0.06621  | 0.6475  |

|       |          |      |    |          |       |            |          |          |         |         |          |          |         |          |         |          |
|-------|----------|------|----|----------|-------|------------|----------|----------|---------|---------|----------|----------|---------|----------|---------|----------|
| TBL2  | 8.31E-05 | TRUE | 7  | 72983276 | 9738  | rs11974409 | intronic | 0.383    | 0.5928  | 0.8293  | 0.7701   | 0.08545  | 0.8739  | 0.6497   | 0.9588  | 4.38E-05 |
| TBL2  | -        | -    | -  | -        | -     | rs2286276  | intronic | 0.5406   | 0.6007  | 0.9271  | 0.8852   | 0.02891  | 0.8377  | 0.9061   | 0.8319  | 6.55E-06 |
| HNF4A | 8.73E-05 | TRUE | 20 | 42984440 | 77046 | rs2071200  | intronic | 0.005551 | 0.5327  | 0.2163  | 0.01834  | 0.06294  | 0.1389  | 0.0401   | 0.8199  | 0.05181  |
| HNF4A | -        | -    | -  | -        | -     | rs1800961  | exonic   | 0.03336  | 0.2932  | 0.05682 | 0.6639   | 7.13E-07 | 0.01698 | 0.4652   | 0.4107  | 0.001891 |
| HNF4A | -        | -    | -  | -        | -     | rs717248   | intronic | 0.04513  | 0.2514  | 0.9405  | 0.1686   | 0.2258   | 0.1336  | 0.2832   | 0.8928  | 0.8678   |
| HNF4A | -        | -    | -  | -        | -     | rs8116574  | intronic | 0.05253  | 0.3948  | 0.1104  | 0.2546   | 0.3511   | 0.615   | 0.2683   | 0.5441  | 0.05949  |
| HNF4A | -        | -    | -  | -        | -     | rs11699172 | upstream | 0.06202  | 0.03885 | 0.6158  | 0.1886   | 0.07262  | 0.9319  | 0.02679  | 0.9985  | 0.02407  |
| HNF4A | -        | -    | -  | -        | -     | rs6031551  | intronic | 0.0694   | 0.9377  | 0.2964  | 0.4522   | 0.2477   | 0.3484  | 0.02853  | 0.08943 | 0.1331   |
| HNF4A | -        | -    | -  | -        | -     | rs6073418  | intronic | 0.09419  | 0.1778  | 0.3375  | 0.2711   | 0.9305   | 0.1645  | 0.138    | 0.864   | 0.5573   |
| HNF4A | -        | -    | -  | -        | -     | rs1885088  | intronic | 0.1992   | 0.1949  | 0.09095 | 0.9582   | 0.2952   | 0.189   | 0.01963  | 0.06757 | 0.4486   |
| HNF4A | -        | -    | -  | -        | -     | rs2425637  | intronic | 0.2946   | 0.3934  | 0.4661  | 0.001837 | 0.4616   | 0.5899  | 0.6927   | 0.4439  | 0.9631   |
| HNF4A | -        | -    | -  | -        | -     | rs6031544  | upstream | 0.3423   | 0.09723 | 0.7847  | 0.6922   | 0.833    | 0.8939  | 0.06637  | 0.7452  | 0.4261   |
| HNF4A | -        | -    | -  | -        | -     | rs6065725  | intronic | 0.487    | 0.6857  | 0.7932  | 0.3122   | 0.8649   | 0.4849  | 0.02582  | 0.3384  | 0.1081   |
| HNF4A | -        | -    | -  | -        | -     | rs2425640  | intronic | 0.743    | 0.5588  | 0.205   | 0.01648  | 0.3673   | 0.9115  | 0.6695   | 0.2458  | 0.632    |
| HNF4A | -        | -    | -  | -        | -     | rs4812829  | intronic | 0.7936   | 0.6283  | 0.9882  | 0.6729   | 0.2641   | 0.827   | 0.7449   | 0.7068  | 0.4461   |
| HNF4A | -        | -    | -  | -        | -     | rs6031580  | intronic | 0.8758   | 0.091   | 0.3912  | 0.6703   | 0.8323   | 0.4151  | 0.1766   | 0.1978  | 0.4449   |
| HNF4A | -        | -    | -  | -        | -     | rs745975   | intronic | 0.876    | 0.9632  | 0.1737  | 0.5846   | 0.09742  | 0.6801  | 0.4243   | 0.3632  | 0.1761   |
| HNF4A | -        | -    | -  | -        | -     | rs3212198  | intronic | 0.984    | 0.9016  | 0.1109  | 0.7824   | 0.1608   | 0.2614  | 0.1155   | 0.5909  | 0.2928   |
| IGSF5 | 9.72E-05 | TRUE | 21 | 41117333 | 56691 | rs2837175  | intronic | 0.04492  | 0.8799  | 0.03859 | 0.5625   | 0.4003   | 0.5885  | 9.66E-07 | 0.3369  | 0.02294  |
| IGSF5 | -        | -    | -  | -        | -     | rs2837225  | exonic   | 0.05096  | 0.5948  | 0.1286  | 0.1747   | 0.4486   | 0.7524  | 2.14E-04 | 0.4958  | 0.06842  |
| IGSF5 | -        | -    | -  | -        | -     | rs2837226  | intronic | 0.06676  | 0.8451  | 0.05637 | 0.5041   | 0.7182   | 0.45    | 1.04E-04 | 0.3191  | 0.1309   |
| IGSF5 | -        | -    | -  | -        | -     | rs2837227  | intronic | 0.06955  | 0.8429  | 0.0642  | 0.4316   | 0.6895   | 0.5076  | 8.46E-05 | 0.3334  | 0.09417  |
| IGSF5 | -        | -    | -  | -        | -     | rs2837220  | intronic | 0.1474   | 0.5475  | 0.2057  | 0.3968   | 0.105    | 0.4448  | 4.84E-04 | 0.6376  | 0.2266   |
| IGSF5 | -        | -    | -  | -        | -     | rs2253748  | intronic | 0.1966   | 0.3183  | 0.08838 | 0.3157   | 0.6532   | 0.5561  | 0.09194  | 0.354   | 0.8125   |
| IGSF5 | -        | -    | -  | -        | -     | rs2837173  | intronic | 0.1966   | 0.3035  | 0.09544 | 0.3238   | 0.628    | 0.535   | 0.08394  | 0.3725  | 0.7932   |
| IGSF5 | -        | -    | -  | -        | -     | rs456800   | intronic | 0.2313   | 0.5927  | 0.6669  | 0.7547   | 0.6906   | 0.4299  | 0.1767   | 0.6668  | 0.03802  |
| IGSF5 | -        | -    | -  | -        | -     | rs2837170  | intronic | 0.2381   | 0.3486  | 0.1061  | 0.3309   | 0.6316   | 0.5138  | 0.09686  | 0.421   | 0.7618   |
| IGSF5 | -        | -    | -  | -        | -     | rs2837214  | intronic | 0.2554   | 0.4915  | 0.03801 | 0.2558   | 0.4099   | 0.9588  | 0.552    | 0.05737 | 0.6184   |
| IGSF5 | -        | -    | -  | -        | -     | rs744568   | intronic | 0.2667   | 0.1647  | 0.1068  | 0.2341   | 0.6417   | 0.7031  | 0.0501   | 0.3376  | 0.9757   |
| IGSF5 | -        | -    | -  | -        | -     | rs741867   | intronic | 0.2852   | 0.2055  | 0.08214 | 0.2428   | 0.6466   | 0.7005  | 0.04886  | 0.2768  | 0.9787   |
| IGSF5 | -        | -    | -  | -        | -     | rs2837216  | intronic | 0.3126   | 0.4709  | 0.09146 | 0.2271   | 0.2666   | 0.6155  | 0.2812   | 0.06754 | 0.5707   |
| IGSF5 | -        | -    | -  | -        | -     | rs2837208  | intronic | 0.3154   | 0.3674  | 0.03719 | 0.3528   | 0.4555   | 0.9521  | 0.5383   | 0.09089 | 0.7251   |
| IGSF5 | -        | -    | -  | -        | -     | rs2837196  | intronic | 0.3701   | 0.6148  | 0.5055  | 0.5559   | 0.3394   | 0.5322  | 0.07715  | 0.8609  | 0.1408   |

|          |          |      |   |           |        |            |            |          |        |         |          |         |          |          |         |          |
|----------|----------|------|---|-----------|--------|------------|------------|----------|--------|---------|----------|---------|----------|----------|---------|----------|
| IGSF5    | -        | -    | - | -         | -      | rs2837205  | intronic   | 0.3771   | 0.2085 | 0.8399  | 0.7099   | 0.2319  | 0.5102   | 5.90E-04 | 0.5952  | 0.03318  |
| IGSF5    | -        | -    | - | -         | -      | rs2837212  | intronic   | 0.4543   | 0.3952 | 0.0844  | 0.3063   | 0.2766  | 0.7595   | 0.27     | 0.132   | 0.6345   |
| IGSF5    | -        | -    | - | -         | -      | rs463903   | intronic   | 0.5952   | 0.6386 | 0.1338  | 0.2226   | 0.366   | 0.8711   | 0.4388   | 0.1028  | 0.4966   |
| IGSF5    | -        | -    | - | -         | -      | rs464201   | intronic   | 0.6113   | 0.7863 | 0.1131  | 0.2421   | 0.2977  | 0.836    | 0.5067   | 0.1333  | 0.4917   |
| IGSF5    | -        | -    | - | -         | -      | rs460549   | downstream | 0.6227   | 0.8114 | 0.1063  | 0.2315   | 0.3193  | 0.8166   | 0.5143   | 0.1277  | 0.4863   |
| IGSF5    | -        | -    | - | -         | -      | rs2837167  | intronic   | 0.7165   | 0.3977 | 0.9722  | 0.8928   | 0.9684  | 0.625    | 0.2877   | 0.6817  | 0.5145   |
| IGSF5    | -        | -    | - | -         | -      | rs2837156  | intronic   | 0.8051   | 0.9101 | 0.7028  | 0.9212   | 0.1321  | 0.9414   | 0.001538 | 0.7718  | 0.05984  |
| IGSF5    | -        | -    | - | -         | -      | rs1888493  | intronic   | 0.8214   | 0.372  | 0.1662  | 0.1652   | 0.3516  | 0.5694   | 0.2527   | 0.7308  | 0.2373   |
| IGSF5    | -        | -    | - | -         | -      | rs2837210  | intronic   | 0.8364   | 0.6152 | 0.4277  | 0.8908   | 0.08227 | 0.6878   | 6.88E-04 | 0.4389  | 0.09776  |
| GNL3     | 1.09E-04 | TRUE | 3 | 52719935  | 8576   | rs1108842  | 5UTR       | 0.5703   | 0.8264 | 0.5703  | 0.02842  | 0.1382  | 0.2629   | 0.006992 | 0.8594  | 0.1843   |
| GNL3     | -        | -    | - | -         | -      | rs11177    | exonic     | 0.8982   | 0.7372 | 0.8531  | 0.73     | 0.3026  | 0.6106   | 0.9126   | 0.5312  | 0.7179   |
| GNL3     | -        | -    | - | -         | -      | rs6976     | 3UTR       | 0.9028   | 0.1491 | 0.2448  | 6.47E-06 | 0.8249  | 0.2806   | 0.5525   | 0.4594  | 0.7002   |
| GNL3     | -        | -    | - | -         | -      | rs6762813  | intronic   | 0.9693   | 0.8074 | 0.8957  | 0.004707 | 0.4603  | 0.5976   | 1.30E-04 | 0.5094  | 0.6592   |
| GNL3     | -        | -    | - | -         | -      | rs2289247  | exonic     | 0.9737   | 0.9694 | 0.8093  | 0.007429 | 0.4166  | 0.5671   | 1.75E-04 | 0.5575  | 0.6664   |
| SNORD19B | 1.09E-04 | TRUE | 3 | 52724753  | 94     | rs1108842  | 5UTR       | 0.5703   | 0.8264 | 0.5703  | 0.02842  | 0.1382  | 0.2629   | 0.006992 | 0.8594  | 0.1843   |
| SNORD19B | -        | -    | - | -         | -      | rs11177    | exonic     | 0.8982   | 0.7372 | 0.8531  | 0.73     | 0.3026  | 0.6106   | 0.9126   | 0.5312  | 0.7179   |
| SNORD19B | -        | -    | - | -         | -      | rs6976     | 3UTR       | 0.9028   | 0.1491 | 0.2448  | 6.47E-06 | 0.8249  | 0.2806   | 0.5525   | 0.4594  | 0.7002   |
| SNORD19B | -        | -    | - | -         | -      | rs6762813  | intronic   | 0.9693   | 0.8074 | 0.8957  | 0.004707 | 0.4603  | 0.5976   | 1.30E-04 | 0.5094  | 0.6592   |
| SNORD19B | -        | -    | - | -         | -      | rs2289247  | exonic     | 0.9737   | 0.9694 | 0.8093  | 0.007429 | 0.4166  | 0.5671   | 1.75E-04 | 0.5575  | 0.6664   |
| ATP13A5  | 1.15E-04 | TRUE | 3 | 192992830 | 103685 | rs12493236 | intronic   | 0.009704 | 0.2573 | 0.1898  | 0.5439   | 0.07538 | 3.14E-04 | 0.3205   | 0.3087  | 1.14E-06 |
| ATP13A5  | -        | -    | - | -         | -      | rs7641152  | intronic   | 0.01358  | 0.7237 | 0.4036  | 0.2495   | 0.1057  | 0.04978  | 0.6289   | 0.8657  | 0.06034  |
| ATP13A5  | -        | -    | - | -         | -      | rs2367477  | intronic   | 0.04822  | 0.212  | 0.03582 | 0.4418   | 0.9787  | 0.004509 | 0.364    | 0.2706  | 0.03756  |
| ATP13A5  | -        | -    | - | -         | -      | rs13085410 | intronic   | 0.05555  | 0.7833 | 0.1512  | 0.9553   | 0.2548  | 0.1429   | 0.07892  | 0.8086  | 0.1735   |
| ATP13A5  | -        | -    | - | -         | -      | rs4687399  | intronic   | 0.05935  | 0.2272 | 0.03316 | 0.4455   | 0.9549  | 0.00438  | 0.3383   | 0.2531  | 0.03459  |
| ATP13A5  | -        | -    | - | -         | -      | rs4481103  | intronic   | 0.06466  | 0.8139 | 0.9216  | 0.9117   | 0.292   | 0.236    | 0.6522   | 0.5227  | 0.5934   |
| ATP13A5  | -        | -    | - | -         | -      | rs2271791  | exonic     | 0.07485  | 0.3084 | 0.06598 | 0.6734   | 0.8574  | 0.01544  | 0.6978   | 0.325   | 0.0539   |
| ATP13A5  | -        | -    | - | -         | -      | rs9851984  | intronic   | 0.1112   | 0.3354 | 0.114   | 0.5505   | 0.5906  | 0.2597   | 0.8173   | 0.701   | 0.8251   |
| ATP13A5  | -        | -    | - | -         | -      | rs1980263  | intronic   | 0.163    | 0.3019 | 0.9926  | 0.3454   | 0.8073  | 0.09868  | 0.9935   | 0.687   | 0.4346   |
| ATP13A5  | -        | -    | - | -         | -      | rs4687402  | intronic   | 0.3747   | 0.6306 | 0.4383  | 0.8639   | 0.276   | 0.4989   | 0.2268   | 0.916   | 0.4484   |
| ATP13A5  | -        | -    | - | -         | -      | rs7648423  | intronic   | 0.4493   | 0.7896 | 0.5821  | 0.3847   | 0.07953 | 0.1563   | 0.8969   | 0.1835  | 0.1129   |
| ATP13A5  | -        | -    | - | -         | -      | rs2367605  | intronic   | 0.554    | 0.5004 | 0.5653  | 0.3952   | 0.2087  | 0.2931   | 0.4893   | 0.7215  | 0.9221   |
| ATP13A5  | -        | -    | - | -         | -      | rs2367478  | intronic   | 0.7671   | 0.2973 | 0.0484  | 0.9932   | 0.1132  | 0.2225   | 0.6143   | 0.07177 | 0.2115   |
| ATP13A5  | -        | -    | - | -         | -      | rs4687401  | intronic   | 0.7979   | 0.1483 | 0.857   | 0.1031   | 0.1076  | 0.7491   | 0.3178   | 0.9845  | 0.2726   |

|         |          |      |    |           |        |            |          |                |         |                 |         |                 |                |        |                 |                 |
|---------|----------|------|----|-----------|--------|------------|----------|----------------|---------|-----------------|---------|-----------------|----------------|--------|-----------------|-----------------|
| ATP13A5 | -        | -    | -  | -         | -      | rs3845934  | intronic | 0.8163         | 0.3082  | 0.106           | 0.8656  | 0.1835          | 0.5584         | 0.2442 | <b>0.02604</b>  | 0.1167          |
| ATP13A5 | -        | -    | -  | -         | -      | rs951016   | intronic | 0.8179         | 0.8243  | 0.0532          | 0.5675  | 0.5126          | 0.4937         | 0.5248 | 0.4513          | 0.5736          |
| PCDHA12 | 1.19E-04 | TRUE | 5  | 140254886 | 2589   | rs269554   | intronic | 0.172          | 0.9766  | 0.5146          | 0.4041  | 0.1262          | 0.6255         | 0.8182 | 0.07802         | 0.8124          |
| PCDHA12 | -        | -    | -  | -         | -      | rs269546   | intronic | 0.1805         | 0.9864  | 0.4715          | 0.4044  | 0.09991         | 0.6143         | 0.804  | 0.06408         | 0.7864          |
| PCDHA12 | -        | -    | -  | -         | -      | rs155806   | intronic | 0.2168         | 0.09095 | 0.7046          | 0.7259  | 0.2123          | 0.7691         | 0.8478 | 0.08984         | 0.9226          |
| PCDHA12 | -        | -    | -  | -         | -      | rs246037   | intronic | 0.2583         | 0.5916  | 0.6191          | 0.7621  | 0.501           | <b>0.03542</b> | 0.3006 | 0.4306          | <b>0.009449</b> |
| PCDHA12 | -        | -    | -  | -         | -      | rs251373   | intronic | 0.2703         | 0.6915  | <b>1.37E-04</b> | 0.959   | 0.4968          | 0.05143        | 0.3177 | <b>2.32E-06</b> | <b>0.005523</b> |
| PCDHA12 | -        | -    | -  | -         | -      | rs31874    | intronic | 0.5322         | 0.11    | <b>0.01766</b>  | 0.5221  | 0.1389          | 0.9701         | 0.8483 | <b>9.46E-04</b> | 0.2634          |
| PCDHA12 | -        | -    | -  | -         | -      | rs155818   | intronic | 0.602          | 0.8108  | <b>3.89E-04</b> | 0.3021  | 0.7364          | 0.116          | 0.2696 | <b>8.10E-04</b> | <b>0.007192</b> |
| PCDHA12 | -        | -    | -  | -         | -      | rs246001   | intronic | 0.6057         | 0.3398  | 0.6824          | 0.376   | 0.2115          | 0.8984         | 0.8386 | 0.1796          | 0.9351          |
| PCDHA12 | -        | -    | -  | -         | -      | rs56003    | intronic | 0.6209         | 0.7788  | <b>3.28E-04</b> | 0.3059  | 0.7124          | 0.1282         | 0.2885 | <b>6.17E-04</b> | <b>0.008587</b> |
| PCDHA12 | -        | -    | -  | -         | -      | rs3756325  | intronic | 0.9869         | 0.7665  | <b>1.14E-04</b> | 0.3402  | 0.3546          | 0.1971         | 0.1832 | <b>5.02E-04</b> | 0.05585         |
| PTPRJ   | 1.19E-04 | TRUE | 11 | 48002109  | 152158 | rs10501322 | intronic | <b>0.04156</b> | 0.8967  | <b>0.04147</b>  | 0.4022  | 0.9701          | 0.3717         | 0.1639 | <b>0.03687</b>  | 0.9259          |
| PTPRJ   | -        | -    | -  | -         | -      | rs12798703 | 3UTR     | 0.07671        | 0.2195  | 0.5317          | 0.8505  | <b>0.02903</b>  | 0.05651        | 0.7881 | 0.8296          | 0.8115          |
| PTPRJ   | -        | -    | -  | -         | -      | rs12099166 | intronic | 0.1116         | 0.449   | 0.9027          | 0.9566  | 0.05655         | 0.1921         | 0.6551 | 0.6224          | 0.8349          |
| PTPRJ   | -        | -    | -  | -         | -      | rs11601310 | intronic | 0.5728         | 0.335   | 0.1467          | 0.1877  | 0.1378          | 0.8408         | 0.527  | <b>0.04301</b>  | 0.1864          |
| PTPRJ   | -        | -    | -  | -         | -      | rs1566729  | intronic | 0.5883         | 0.2087  | <b>0.02756</b>  | 0.4156  | <b>1.80E-04</b> | 0.8809         | 0.6454 | <b>0.02975</b>  | 0.8311          |
| PTPRJ   | -        | -    | -  | -         | -      | rs10769317 | intronic | 0.6342         | 0.2852  | <b>0.02352</b>  | 0.752   | <b>0.008523</b> | 0.6036         | 0.4857 | <b>0.009306</b> | 0.6683          |
| PTPRJ   | -        | -    | -  | -         | -      | rs1875696  | intronic | 0.6862         | 0.289   | <b>0.0324</b>   | 0.7004  | <b>0.01341</b>  | 0.5225         | 0.5254 | <b>0.0183</b>   | 0.8059          |
| PTPRJ   | -        | -    | -  | -         | -      | rs1910364  | intronic | 0.7033         | 0.2947  | 0.2324          | 0.5092  | <b>0.0152</b>   | 0.2471         | 0.948  | 0.1169          | 0.7689          |
| PTPRJ   | -        | -    | -  | -         | -      | rs6485802  | intronic | 0.7415         | 0.364   | 0.4883          | 0.291   | <b>0.002874</b> | 0.3405         | 0.8034 | 0.2229          | 0.6868          |
| PTPRJ   | -        | -    | -  | -         | -      | rs4752897  | intronic | 0.7504         | 0.2933  | 0.2588          | 0.4624  | <b>0.01248</b>  | 0.2397         | 0.9623 | 0.1336          | 0.7603          |
| PTPRJ   | -        | -    | -  | -         | -      | rs2270994  | intronic | 0.7849         | 0.9343  | 0.1984          | 0.3406  | <b>0.008102</b> | 0.7751         | 0.6791 | 0.06182         | 0.7134          |
| PTPRJ   | -        | -    | -  | -         | -      | rs1113480  | intronic | 0.8941         | 0.4773  | 0.4627          | 0.818   | <b>9.83E-04</b> | 0.5182         | 0.9286 | 0.1389          | 0.866           |
| PTPRJ   | -        | -    | -  | -         | -      | rs7946766  | intronic | 0.9263         | 0.3948  | 0.7952          | 0.5433  | <b>1.35E-06</b> | 0.3734         | 0.6843 | 0.3887          | 0.8044          |
| PTPRJ   | -        | -    | -  | -         | -      | rs1503185  | exonic   | 0.937          | 0.2914  | 0.3694          | 0.06634 | 0.7666          | 0.7513         | 0.7955 | 0.6177          | 0.1593          |
| PTPRJ   | -        | -    | -  | -         | -      | rs1566734  | exonic   | 0.9622         | 0.2686  | 0.3947          | 0.06836 | 0.714           | 0.7946         | 0.7678 | 0.6288          | 0.1534          |
| PTPRJ   | -        | -    | -  | -         | -      | rs3741410  | intronic | 0.9668         | 0.1554  | 0.1519          | 0.365   | <b>9.17E-05</b> | 0.3665         | 0.7982 | 0.1049          | 0.9464          |
| PTPRJ   | -        | -    | -  | -         | -      | rs905476   | intronic | 0.9691         | 0.3896  | 0.3947          | 0.06224 | 0.5952          | 0.7955         | 0.7852 | 0.7104          | 0.1983          |
| PCDHA8  | 1.21E-04 | TRUE | 5  | 140220906 | 171024 | rs269554   | intronic | 0.172          | 0.9766  | 0.5146          | 0.4041  | 0.1262          | 0.6255         | 0.8182 | 0.07802         | 0.8124          |
| PCDHA8  | -        | -    | -  | -         | -      | rs269546   | intronic | 0.1805         | 0.9864  | 0.4715          | 0.4044  | 0.09991         | 0.6143         | 0.804  | 0.06408         | 0.7864          |
| PCDHA8  | -        | -    | -  | -         | -      | rs155806   | intronic | 0.2168         | 0.09095 | 0.7046          | 0.7259  | 0.2123          | 0.7691         | 0.8478 | 0.08984         | 0.9226          |
| PCDHA8  | -        | -    | -  | -         | -      | rs246037   | intronic | 0.2583         | 0.5916  | 0.6191          | 0.7621  | 0.501           | <b>0.03542</b> | 0.3006 | 0.4306          | <b>0.009449</b> |



|         |          |      |   |           |        |           |          |        |         |          |        |         |         |        |          |          |
|---------|----------|------|---|-----------|--------|-----------|----------|--------|---------|----------|--------|---------|---------|--------|----------|----------|
| PCDHA8  | -        | -    | - | -         | -      | rs251370  | intronic | 0.2676 | 0.6527  | 1.46E-04 | 0.94   | 0.4745  | 0.05209 | 0.345  | 2.84E-06 | 0.007411 |
| PCDHA8  | -        | -    | - | -         | -      | rs251373  | intronic | 0.2703 | 0.6915  | 1.37E-04 | 0.959  | 0.4968  | 0.05143 | 0.3177 | 2.32E-06 | 0.005523 |
| PCDHA8  | -        | -    | - | -         | -      | rs31874   | intronic | 0.5322 | 0.11    | 0.01766  | 0.5221 | 0.1389  | 0.9701  | 0.8483 | 9.46E-04 | 0.2634   |
| PCDHA8  | -        | -    | - | -         | -      | rs155818  | intronic | 0.602  | 0.8108  | 3.89E-04 | 0.3021 | 0.7364  | 0.116   | 0.2696 | 8.10E-04 | 0.007192 |
| PCDHA8  | -        | -    | - | -         | -      | rs246001  | intronic | 0.6057 | 0.3398  | 0.6824   | 0.376  | 0.2115  | 0.8984  | 0.8386 | 0.1796   | 0.9351   |
| PCDHA8  | -        | -    | - | -         | -      | rs56003   | intronic | 0.6209 | 0.7788  | 3.28E-04 | 0.3059 | 0.7124  | 0.1282  | 0.2885 | 6.17E-04 | 0.008587 |
| PCDHA8  | -        | -    | - | -         | -      | rs3756325 | intronic | 0.9869 | 0.7665  | 1.14E-04 | 0.3402 | 0.3546  | 0.1971  | 0.1832 | 5.02E-04 | 0.05585  |
| PCDHA9  | 1.21E-04 | TRUE | 5 | 140227356 | 164574 | rs269554  | intronic | 0.172  | 0.9766  | 0.5146   | 0.4041 | 0.1262  | 0.6255  | 0.8182 | 0.07802  | 0.8124   |
| PCDHA9  | -        | -    | - | -         | -      | rs269546  | intronic | 0.1805 | 0.9864  | 0.4715   | 0.4044 | 0.09991 | 0.6143  | 0.804  | 0.06408  | 0.7864   |
| PCDHA9  | -        | -    | - | -         | -      | rs155806  | intronic | 0.2168 | 0.09095 | 0.7046   | 0.7259 | 0.2123  | 0.7691  | 0.8478 | 0.08984  | 0.9226   |
| PCDHA9  | -        | -    | - | -         | -      | rs246037  | intronic | 0.2583 | 0.5916  | 0.6191   | 0.7621 | 0.501   | 0.03542 | 0.3006 | 0.4306   | 0.009449 |
| PCDHA9  | -        | -    | - | -         | -      | rs251370  | intronic | 0.2676 | 0.6527  | 1.46E-04 | 0.94   | 0.4745  | 0.05209 | 0.345  | 2.84E-06 | 0.007411 |
| PCDHA9  | -        | -    | - | -         | -      | rs251373  | intronic | 0.2703 | 0.6915  | 1.37E-04 | 0.959  | 0.4968  | 0.05143 | 0.3177 | 2.32E-06 | 0.005523 |
| PCDHA9  | -        | -    | - | -         | -      | rs31874   | intronic | 0.5322 | 0.11    | 0.01766  | 0.5221 | 0.1389  | 0.9701  | 0.8483 | 9.46E-04 | 0.2634   |
| PCDHA9  | -        | -    | - | -         | -      | rs155818  | intronic | 0.602  | 0.8108  | 3.89E-04 | 0.3021 | 0.7364  | 0.116   | 0.2696 | 8.10E-04 | 0.007192 |
| PCDHA9  | -        | -    | - | -         | -      | rs246001  | intronic | 0.6057 | 0.3398  | 0.6824   | 0.376  | 0.2115  | 0.8984  | 0.8386 | 0.1796   | 0.9351   |
| PCDHA9  | -        | -    | - | -         | -      | rs56003   | intronic | 0.6209 | 0.7788  | 3.28E-04 | 0.3059 | 0.7124  | 0.1282  | 0.2885 | 6.17E-04 | 0.008587 |
| PCDHA9  | -        | -    | - | -         | -      | rs3756325 | intronic | 0.9869 | 0.7665  | 1.14E-04 | 0.3402 | 0.3546  | 0.1971  | 0.1832 | 5.02E-04 | 0.05585  |
| PCDHA10 | 1.21E-04 | TRUE | 5 | 140235467 | 156463 | rs269554  | intronic | 0.172  | 0.9766  | 0.5146   | 0.4041 | 0.1262  | 0.6255  | 0.8182 | 0.07802  | 0.8124   |
| PCDHA10 | -        | -    | - | -         | -      | rs269546  | intronic | 0.1805 | 0.9864  | 0.4715   | 0.4044 | 0.09991 | 0.6143  | 0.804  | 0.06408  | 0.7864   |
| PCDHA10 | -        | -    | - | -         | -      | rs155806  | intronic | 0.2168 | 0.09095 | 0.7046   | 0.7259 | 0.2123  | 0.7691  | 0.8478 | 0.08984  | 0.9226   |
| PCDHA10 | -        | -    | - | -         | -      | rs246037  | intronic | 0.2583 | 0.5916  | 0.6191   | 0.7621 | 0.501   | 0.03542 | 0.3006 | 0.4306   | 0.009449 |
| PCDHA10 | -        | -    | - | -         | -      | rs251370  | intronic | 0.2676 | 0.6527  | 1.46E-04 | 0.94   | 0.4745  | 0.05209 | 0.345  | 2.84E-06 | 0.007411 |
| PCDHA10 | -        | -    | - | -         | -      | rs251373  | intronic | 0.2703 | 0.6915  | 1.37E-04 | 0.959  | 0.4968  | 0.05143 | 0.3177 | 2.32E-06 | 0.005523 |
| PCDHA10 | -        | -    | - | -         | -      | rs31874   | intronic | 0.5322 | 0.11    | 0.01766  | 0.5221 | 0.1389  | 0.9701  | 0.8483 | 9.46E-04 | 0.2634   |
| PCDHA10 | -        | -    | - | -         | -      | rs155818  | intronic | 0.602  | 0.8108  | 3.89E-04 | 0.3021 | 0.7364  | 0.116   | 0.2696 | 8.10E-04 | 0.007192 |
| PCDHA10 | -        | -    | - | -         | -      | rs246001  | intronic | 0.6057 | 0.3398  | 0.6824   | 0.376  | 0.2115  | 0.8984  | 0.8386 | 0.1796   | 0.9351   |
| PCDHA10 | -        | -    | - | -         | -      | rs56003   | intronic | 0.6209 | 0.7788  | 3.28E-04 | 0.3059 | 0.7124  | 0.1282  | 0.2885 | 6.17E-04 | 0.008587 |
| PCDHA10 | -        | -    | - | -         | -      | rs3756325 | intronic | 0.9869 | 0.7665  | 1.14E-04 | 0.3402 | 0.3546  | 0.1971  | 0.1832 | 5.02E-04 | 0.05585  |
| PCDHA11 | 1.21E-04 | TRUE | 5 | 140247097 | 4089   | rs269554  | intronic | 0.172  | 0.9766  | 0.5146   | 0.4041 | 0.1262  | 0.6255  | 0.8182 | 0.07802  | 0.8124   |
| PCDHA11 | -        | -    | - | -         | -      | rs269546  | intronic | 0.1805 | 0.9864  | 0.4715   | 0.4044 | 0.09991 | 0.6143  | 0.804  | 0.06408  | 0.7864   |
| PCDHA11 | -        | -    | - | -         | -      | rs155806  | intronic | 0.2168 | 0.09095 | 0.7046   | 0.7259 | 0.2123  | 0.7691  | 0.8478 | 0.08984  | 0.9226   |
| PCDHA11 | -        | -    | - | -         | -      | rs246037  | intronic | 0.2583 | 0.5916  | 0.6191   | 0.7621 | 0.501   | 0.03542 | 0.3006 | 0.4306   | 0.009449 |

|         |          |      |    |           |       |            |          |         |         |          |         |         |         |          |          |          |
|---------|----------|------|----|-----------|-------|------------|----------|---------|---------|----------|---------|---------|---------|----------|----------|----------|
| PCDHA11 | -        | -    | -  | -         | -     | rs251370   | intronic | 0.2676  | 0.6527  | 1.46E-04 | 0.94    | 0.4745  | 0.05209 | 0.345    | 2.84E-06 | 0.007411 |
| PCDHA11 | -        | -    | -  | -         | -     | rs251373   | intronic | 0.2703  | 0.6915  | 1.37E-04 | 0.959   | 0.4968  | 0.05143 | 0.3177   | 2.32E-06 | 0.005523 |
| PCDHA11 | -        | -    | -  | -         | -     | rs31874    | intronic | 0.5322  | 0.11    | 0.01766  | 0.5221  | 0.1389  | 0.9701  | 0.8483   | 9.46E-04 | 0.2634   |
| PCDHA11 | -        | -    | -  | -         | -     | rs155818   | intronic | 0.602   | 0.8108  | 3.89E-04 | 0.3021  | 0.7364  | 0.116   | 0.2696   | 8.10E-04 | 0.007192 |
| PCDHA11 | -        | -    | -  | -         | -     | rs246001   | intronic | 0.6057  | 0.3398  | 0.6824   | 0.376   | 0.2115  | 0.8984  | 0.8386   | 0.1796   | 0.9351   |
| PCDHA11 | -        | -    | -  | -         | -     | rs56003    | intronic | 0.6209  | 0.7788  | 3.28E-04 | 0.3059  | 0.7124  | 0.1282  | 0.2885   | 6.17E-04 | 0.008587 |
| PCDHA11 | -        | -    | -  | -         | -     | rs3756325  | intronic | 0.9869  | 0.7665  | 1.14E-04 | 0.3402  | 0.3546  | 0.1971  | 0.1832   | 5.02E-04 | 0.05585  |
| LDLR    | 1.22E-04 | TRUE | 19 | 11200037  | 44469 | rs2228671  | exonic   | 0.01898 | 0.6     | 0.1552   | 0.02482 | 0.9062  | 0.2885  | 2.34E-06 | 0.7329   | 0.9259   |
| LDLR    | -        | -    | -  | -         | -     | rs688      | exonic   | 0.2571  | 0.2648  | 0.7494   | 0.7488  | 0.3062  | 0.2784  | 0.4781   | 0.7456   | 0.7798   |
| LDLR    | -        | -    | -  | -         | -     | rs1433099  | 3UTR     | 0.2671  | 0.1432  | 0.7847   | 0.7041  | 0.08323 | 0.3458  | 0.1243   | 0.3984   | 0.1992   |
| LDLR    | -        | -    | -  | -         | -     | rs1799898  | exonic   | 0.2866  | 0.01184 | 0.2402   | 0.07395 | 0.544   | 0.3625  | 0.5266   | 0.5658   | 0.937    |
| LDLR    | -        | -    | -  | -         | -     | rs2569538  | intronic | 0.4305  | 0.4183  | 0.5935   | 0.09449 | 0.3066  | 0.5847  | 0.05369  | 0.3916   | 0.3261   |
| LDLR    | -        | -    | -  | -         | -     | rs5930     | exonic   | 0.7831  | 0.6627  | 0.3461   | 0.7082  | 0.5653  | 0.8159  | 0.2087   | 0.9924   | 0.631    |
| LDLR    | -        | -    | -  | -         | -     | rs2569537  | intronic | 0.8101  | 0.9703  | 0.5642   | 0.8918  | 0.2059  | 0.9675  | 0.5865   | 0.15     | 0.7931   |
| PCDHA6  | 1.35E-04 | TRUE | 5  | 140207506 | 2583  | rs269554   | intronic | 0.172   | 0.9766  | 0.5146   | 0.4041  | 0.1262  | 0.6255  | 0.8182   | 0.07802  | 0.8124   |
| PCDHA6  | -        | -    | -  | -         | -     | rs269546   | intronic | 0.1805  | 0.9864  | 0.4715   | 0.4044  | 0.09991 | 0.6143  | 0.804    | 0.06408  | 0.7864   |
| PCDHA6  | -        | -    | -  | -         | -     | rs155806   | intronic | 0.2168  | 0.09095 | 0.7046   | 0.7259  | 0.2123  | 0.7691  | 0.8478   | 0.08984  | 0.9226   |
| PCDHA6  | -        | -    | -  | -         | -     | rs246037   | intronic | 0.2583  | 0.5916  | 0.6191   | 0.7621  | 0.501   | 0.03542 | 0.3006   | 0.4306   | 0.009449 |
| PCDHA6  | -        | -    | -  | -         | -     | rs251370   | intronic | 0.2676  | 0.6527  | 1.46E-04 | 0.94    | 0.4745  | 0.05209 | 0.345    | 2.84E-06 | 0.007411 |
| PCDHA6  | -        | -    | -  | -         | -     | rs251373   | intronic | 0.2703  | 0.6915  | 1.37E-04 | 0.959   | 0.4968  | 0.05143 | 0.3177   | 2.32E-06 | 0.005523 |
| PCDHA6  | -        | -    | -  | -         | -     | rs31874    | intronic | 0.5322  | 0.11    | 0.01766  | 0.5221  | 0.1389  | 0.9701  | 0.8483   | 9.46E-04 | 0.2634   |
| PCDHA6  | -        | -    | -  | -         | -     | rs10038174 | intronic | 0.5817  | 0.652   | 8.43E-04 | 0.9749  | 0.9338  | 0.4384  | 0.2682   | 2.64E-04 | 0.03247  |
| PCDHA6  | -        | -    | -  | -         | -     | rs155818   | intronic | 0.602   | 0.8108  | 3.89E-04 | 0.3021  | 0.7364  | 0.116   | 0.2696   | 8.10E-04 | 0.007192 |
| PCDHA6  | -        | -    | -  | -         | -     | rs246001   | intronic | 0.6057  | 0.3398  | 0.6824   | 0.376   | 0.2115  | 0.8984  | 0.8386   | 0.1796   | 0.9351   |
| PCDHA6  | -        | -    | -  | -         | -     | rs56003    | intronic | 0.6209  | 0.7788  | 3.28E-04 | 0.3059  | 0.7124  | 0.1282  | 0.2885   | 6.17E-04 | 0.008587 |
| PCDHA6  | -        | -    | -  | -         | -     | rs3756325  | intronic | 0.9869  | 0.7665  | 1.14E-04 | 0.3402  | 0.3546  | 0.1971  | 0.1832   | 5.02E-04 | 0.05585  |
| PCDHA7  | 1.35E-04 | TRUE | 5  | 140213968 | 2371  | rs269554   | intronic | 0.172   | 0.9766  | 0.5146   | 0.4041  | 0.1262  | 0.6255  | 0.8182   | 0.07802  | 0.8124   |
| PCDHA7  | -        | -    | -  | -         | -     | rs269546   | intronic | 0.1805  | 0.9864  | 0.4715   | 0.4044  | 0.09991 | 0.6143  | 0.804    | 0.06408  | 0.7864   |
| PCDHA7  | -        | -    | -  | -         | -     | rs155806   | intronic | 0.2168  | 0.09095 | 0.7046   | 0.7259  | 0.2123  | 0.7691  | 0.8478   | 0.08984  | 0.9226   |
| PCDHA7  | -        | -    | -  | -         | -     | rs246037   | intronic | 0.2583  | 0.5916  | 0.6191   | 0.7621  | 0.501   | 0.03542 | 0.3006   | 0.4306   | 0.009449 |
| PCDHA7  | -        | -    | -  | -         | -     | rs251370   | intronic | 0.2676  | 0.6527  | 1.46E-04 | 0.94    | 0.4745  | 0.05209 | 0.345    | 2.84E-06 | 0.007411 |
| PCDHA7  | -        | -    | -  | -         | -     | rs251373   | intronic | 0.2703  | 0.6915  | 1.37E-04 | 0.959   | 0.4968  | 0.05143 | 0.3177   | 2.32E-06 | 0.005523 |
| PCDHA7  | -        | -    | -  | -         | -     | rs31874    | intronic | 0.5322  | 0.11    | 0.01766  | 0.5221  | 0.1389  | 0.9701  | 0.8483   | 9.46E-04 | 0.2634   |

|        |          |      |   |   |           |            |          |          |         |          |        |         |         |        |          |          |        |
|--------|----------|------|---|---|-----------|------------|----------|----------|---------|----------|--------|---------|---------|--------|----------|----------|--------|
| PCDHA7 | -        | -    | - | - | -         | rs10038174 | intronic | 0.5817   | 0.652   | 8.43E-04 | 0.9749 | 0.9338  | 0.4384  | 0.2682 | 2.64E-04 | 0.03247  |        |
| PCDHA7 | -        | -    | - | - | -         | rs155818   | intronic | 0.602    | 0.8108  | 3.89E-04 | 0.3021 | 0.7364  | 0.116   | 0.2696 | 8.10E-04 | 0.007192 |        |
| PCDHA7 | -        | -    | - | - | -         | rs246001   | intronic | 0.6057   | 0.3398  | 0.6824   | 0.376  | 0.2115  | 0.8984  | 0.8386 | 0.1796   | 0.9351   |        |
| PCDHA7 | -        | -    | - | - | -         | rs56003    | intronic | 0.6209   | 0.7788  | 3.28E-04 | 0.3059 | 0.7124  | 0.1282  | 0.2885 | 6.17E-04 | 0.008587 |        |
| PCDHA7 | -        | -    | - | - | -         | rs3756325  | intronic | 0.9869   | 0.7665  | 1.14E-04 | 0.3402 | 0.3546  | 0.1971  | 0.1832 | 5.02E-04 | 0.05585  |        |
| PCDHA5 | 1.42E-04 | TRUE |   | 5 | 140201360 | 190570     | rs269554 | intronic | 0.172   | 0.9766   | 0.5146 | 0.4041  | 0.1262  | 0.6255 | 0.8182   | 0.07802  | 0.8124 |
| PCDHA5 | -        | -    | - | - | -         | rs269546   | intronic | 0.1805   | 0.9864  | 0.4715   | 0.4044 | 0.09991 | 0.6143  | 0.804  | 0.06408  | 0.7864   |        |
| PCDHA5 | -        | -    | - | - | -         | rs155806   | intronic | 0.2168   | 0.09095 | 0.7046   | 0.7259 | 0.2123  | 0.7691  | 0.8478 | 0.08984  | 0.9226   |        |
| PCDHA5 | -        | -    | - | - | -         | rs246037   | intronic | 0.2583   | 0.5916  | 0.6191   | 0.7621 | 0.501   | 0.03542 | 0.3006 | 0.4306   | 0.009449 |        |
| PCDHA5 | -        | -    | - | - | -         | rs251370   | intronic | 0.2676   | 0.6527  | 1.46E-04 | 0.94   | 0.4745  | 0.05209 | 0.345  | 2.84E-06 | 0.007411 |        |
| PCDHA5 | -        | -    | - | - | -         | rs251373   | intronic | 0.2703   | 0.6915  | 1.37E-04 | 0.959  | 0.4968  | 0.05143 | 0.3177 | 2.32E-06 | 0.005523 |        |
| PCDHA5 | -        | -    | - | - | -         | rs7732179  | intronic | 0.4129   | 0.8263  | 0.001359 | 0.9532 | 0.9488  | 0.2113  | 0.2028 | 4.25E-04 | 0.02154  |        |
| PCDHA5 | -        | -    | - | - | -         | rs31874    | intronic | 0.5322   | 0.11    | 0.01766  | 0.5221 | 0.1389  | 0.9701  | 0.8483 | 9.46E-04 | 0.2634   |        |
| PCDHA5 | -        | -    | - | - | -         | rs10038174 | intronic | 0.5817   | 0.652   | 8.43E-04 | 0.9749 | 0.9338  | 0.4384  | 0.2682 | 2.64E-04 | 0.03247  |        |
| PCDHA5 | -        | -    | - | - | -         | rs155818   | intronic | 0.602    | 0.8108  | 3.89E-04 | 0.3021 | 0.7364  | 0.116   | 0.2696 | 8.10E-04 | 0.007192 |        |
| PCDHA5 | -        | -    | - | - | -         | rs246001   | intronic | 0.6057   | 0.3398  | 0.6824   | 0.376  | 0.2115  | 0.8984  | 0.8386 | 0.1796   | 0.9351   |        |
| PCDHA5 | -        | -    | - | - | -         | rs56003    | intronic | 0.6209   | 0.7788  | 3.28E-04 | 0.3059 | 0.7124  | 0.1282  | 0.2885 | 6.17E-04 | 0.008587 |        |
| PCDHA5 | -        | -    | - | - | -         | rs3756325  | intronic | 0.9869   | 0.7665  | 1.14E-04 | 0.3402 | 0.3546  | 0.1971  | 0.1832 | 5.02E-04 | 0.05585  |        |
| PCDHA4 | 1.43E-04 | TRUE |   | 5 | 140186658 | 205272     | rs269554 | intronic | 0.172   | 0.9766   | 0.5146 | 0.4041  | 0.1262  | 0.6255 | 0.8182   | 0.07802  | 0.8124 |
| PCDHA4 | -        | -    | - | - | -         | rs269546   | intronic | 0.1805   | 0.9864  | 0.4715   | 0.4044 | 0.09991 | 0.6143  | 0.804  | 0.06408  | 0.7864   |        |
| PCDHA4 | -        | -    | - | - | -         | rs155806   | intronic | 0.2168   | 0.09095 | 0.7046   | 0.7259 | 0.2123  | 0.7691  | 0.8478 | 0.08984  | 0.9226   |        |
| PCDHA4 | -        | -    | - | - | -         | rs246037   | intronic | 0.2583   | 0.5916  | 0.6191   | 0.7621 | 0.501   | 0.03542 | 0.3006 | 0.4306   | 0.009449 |        |
| PCDHA4 | -        | -    | - | - | -         | rs251370   | intronic | 0.2676   | 0.6527  | 1.46E-04 | 0.94   | 0.4745  | 0.05209 | 0.345  | 2.84E-06 | 0.007411 |        |
| PCDHA4 | -        | -    | - | - | -         | rs251373   | intronic | 0.2703   | 0.6915  | 1.37E-04 | 0.959  | 0.4968  | 0.05143 | 0.3177 | 2.32E-06 | 0.005523 |        |
| PCDHA4 | -        | -    | - | - | -         | rs7732179  | intronic | 0.4129   | 0.8263  | 0.001359 | 0.9532 | 0.9488  | 0.2113  | 0.2028 | 4.25E-04 | 0.02154  |        |
| PCDHA4 | -        | -    | - | - | -         | rs31874    | intronic | 0.5322   | 0.11    | 0.01766  | 0.5221 | 0.1389  | 0.9701  | 0.8483 | 9.46E-04 | 0.2634   |        |
| PCDHA4 | -        | -    | - | - | -         | rs3822346  | exonic   | 0.5805   | 0.7103  | 6.72E-04 | 0.9879 | 0.851   | 0.3846  | 0.2975 | 3.23E-04 | 0.03016  |        |
| PCDHA4 | -        | -    | - | - | -         | rs10038174 | intronic | 0.5817   | 0.652   | 8.43E-04 | 0.9749 | 0.9338  | 0.4384  | 0.2682 | 2.64E-04 | 0.03247  |        |
| PCDHA4 | -        | -    | - | - | -         | rs1030166  | intronic | 0.5961   | 0.7974  | 5.70E-04 | 0.9921 | 0.8504  | 0.3942  | 0.345  | 2.69E-04 | 0.0367   |        |
| PCDHA4 | -        | -    | - | - | -         | rs155818   | intronic | 0.602    | 0.8108  | 3.89E-04 | 0.3021 | 0.7364  | 0.116   | 0.2696 | 8.10E-04 | 0.007192 |        |
| PCDHA4 | -        | -    | - | - | -         | rs246001   | intronic | 0.6057   | 0.3398  | 0.6824   | 0.376  | 0.2115  | 0.8984  | 0.8386 | 0.1796   | 0.9351   |        |
| PCDHA4 | -        | -    | - | - | -         | rs56003    | intronic | 0.6209   | 0.7788  | 3.28E-04 | 0.3059 | 0.7124  | 0.1282  | 0.2885 | 6.17E-04 | 0.008587 |        |
| PCDHA4 | -        | -    | - | - | -         | rs3756325  | intronic | 0.9869   | 0.7665  | 1.14E-04 | 0.3402 | 0.3546  | 0.1971  | 0.1832 | 5.02E-04 | 0.05585  |        |

|        |          |      |   |           |        |            |          |        |         |                 |        |         |                |        |                 |                 |
|--------|----------|------|---|-----------|--------|------------|----------|--------|---------|-----------------|--------|---------|----------------|--------|-----------------|-----------------|
| PCDHA1 | 1.43E-04 | TRUE | 5 | 140165720 | 226210 | rs269554   | intronic | 0.172  | 0.9766  | 0.5146          | 0.4041 | 0.1262  | 0.6255         | 0.8182 | 0.07802         | 0.8124          |
| PCDHA1 | -        | -    | - | -         | -      | rs269546   | intronic | 0.1805 | 0.9864  | 0.4715          | 0.4044 | 0.09991 | 0.6143         | 0.804  | 0.06408         | 0.7864          |
| PCDHA1 | -        | -    | - | -         | -      | rs155806   | intronic | 0.2168 | 0.09095 | 0.7046          | 0.7259 | 0.2123  | 0.7691         | 0.8478 | 0.08984         | 0.9226          |
| PCDHA1 | -        | -    | - | -         | -      | rs246037   | intronic | 0.2583 | 0.5916  | 0.6191          | 0.7621 | 0.501   | <b>0.03542</b> | 0.3006 | 0.4306          | <b>0.009449</b> |
| PCDHA1 | -        | -    | - | -         | -      | rs251370   | intronic | 0.2676 | 0.6527  | <b>1.46E-04</b> | 0.94   | 0.4745  | 0.05209        | 0.345  | <b>2.84E-06</b> | <b>0.007411</b> |
| PCDHA1 | -        | -    | - | -         | -      | rs251373   | intronic | 0.2703 | 0.6915  | <b>1.37E-04</b> | 0.959  | 0.4968  | 0.05143        | 0.3177 | <b>2.32E-06</b> | <b>0.005523</b> |
| PCDHA1 | -        | -    | - | -         | -      | rs7732179  | intronic | 0.4129 | 0.8263  | <b>0.001359</b> | 0.9532 | 0.9488  | 0.2113         | 0.2028 | <b>4.25E-04</b> | <b>0.02154</b>  |
| PCDHA1 | -        | -    | - | -         | -      | rs31874    | intronic | 0.5322 | 0.11    | <b>0.01766</b>  | 0.5221 | 0.1389  | 0.9701         | 0.8483 | <b>9.46E-04</b> | 0.2634          |
| PCDHA1 | -        | -    | - | -         | -      | rs3822346  | exonic   | 0.5805 | 0.7103  | <b>6.72E-04</b> | 0.9879 | 0.851   | 0.3846         | 0.2975 | <b>3.23E-04</b> | <b>0.03016</b>  |
| PCDHA1 | -        | -    | - | -         | -      | rs10038174 | intronic | 0.5817 | 0.652   | <b>8.43E-04</b> | 0.9749 | 0.9338  | 0.4384         | 0.2682 | <b>2.64E-04</b> | <b>0.03247</b>  |
| PCDHA1 | -        | -    | - | -         | -      | rs3756338  | intronic | 0.5832 | 0.6992  | <b>6.68E-04</b> | 0.9808 | 0.8712  | 0.3875         | 0.3033 | <b>3.52E-04</b> | <b>0.03019</b>  |
| PCDHA1 | -        | -    | - | -         | -      | rs1030166  | intronic | 0.5961 | 0.7974  | <b>5.70E-04</b> | 0.9921 | 0.8504  | 0.3942         | 0.345  | <b>2.69E-04</b> | <b>0.0367</b>   |
| PCDHA1 | -        | -    | - | -         | -      | rs155818   | intronic | 0.602  | 0.8108  | <b>3.89E-04</b> | 0.3021 | 0.7364  | 0.116          | 0.2696 | <b>8.10E-04</b> | <b>0.007192</b> |
| PCDHA1 | -        | -    | - | -         | -      | rs246001   | intronic | 0.6057 | 0.3398  | 0.6824          | 0.376  | 0.2115  | 0.8984         | 0.8386 | 0.1796          | 0.9351          |
| PCDHA1 | -        | -    | - | -         | -      | rs56003    | intronic | 0.6209 | 0.7788  | <b>3.28E-04</b> | 0.3059 | 0.7124  | 0.1282         | 0.2885 | <b>6.17E-04</b> | <b>0.008587</b> |
| PCDHA1 | -        | -    | - | -         | -      | rs3756325  | intronic | 0.9869 | 0.7665  | <b>1.14E-04</b> | 0.3402 | 0.3546  | 0.1971         | 0.1832 | <b>5.02E-04</b> | 0.05585         |
| PCDHA3 | 1.43E-04 | TRUE | 5 | 140180782 | 2476   | rs269554   | intronic | 0.172  | 0.9766  | 0.5146          | 0.4041 | 0.1262  | 0.6255         | 0.8182 | 0.07802         | 0.8124          |
| PCDHA3 | -        | -    | - | -         | -      | rs269546   | intronic | 0.1805 | 0.9864  | 0.4715          | 0.4044 | 0.09991 | 0.6143         | 0.804  | 0.06408         | 0.7864          |
| PCDHA3 | -        | -    | - | -         | -      | rs155806   | intronic | 0.2168 | 0.09095 | 0.7046          | 0.7259 | 0.2123  | 0.7691         | 0.8478 | 0.08984         | 0.9226          |
| PCDHA3 | -        | -    | - | -         | -      | rs246037   | intronic | 0.2583 | 0.5916  | 0.6191          | 0.7621 | 0.501   | <b>0.03542</b> | 0.3006 | 0.4306          | <b>0.009449</b> |
| PCDHA3 | -        | -    | - | -         | -      | rs251370   | intronic | 0.2676 | 0.6527  | <b>1.46E-04</b> | 0.94   | 0.4745  | 0.05209        | 0.345  | <b>2.84E-06</b> | <b>0.007411</b> |
| PCDHA3 | -        | -    | - | -         | -      | rs251373   | intronic | 0.2703 | 0.6915  | <b>1.37E-04</b> | 0.959  | 0.4968  | 0.05143        | 0.3177 | <b>2.32E-06</b> | <b>0.005523</b> |
| PCDHA3 | -        | -    | - | -         | -      | rs7732179  | intronic | 0.4129 | 0.8263  | <b>0.001359</b> | 0.9532 | 0.9488  | 0.2113         | 0.2028 | <b>4.25E-04</b> | <b>0.02154</b>  |
| PCDHA3 | -        | -    | - | -         | -      | rs31874    | intronic | 0.5322 | 0.11    | <b>0.01766</b>  | 0.5221 | 0.1389  | 0.9701         | 0.8483 | <b>9.46E-04</b> | 0.2634          |
| PCDHA3 | -        | -    | - | -         | -      | rs3822346  | exonic   | 0.5805 | 0.7103  | <b>6.72E-04</b> | 0.9879 | 0.851   | 0.3846         | 0.2975 | <b>3.23E-04</b> | <b>0.03016</b>  |
| PCDHA3 | -        | -    | - | -         | -      | rs10038174 | intronic | 0.5817 | 0.652   | <b>8.43E-04</b> | 0.9749 | 0.9338  | 0.4384         | 0.2682 | <b>2.64E-04</b> | <b>0.03247</b>  |
| PCDHA3 | -        | -    | - | -         | -      | rs3756338  | intronic | 0.5832 | 0.6992  | <b>6.68E-04</b> | 0.9808 | 0.8712  | 0.3875         | 0.3033 | <b>3.52E-04</b> | <b>0.03019</b>  |
| PCDHA3 | -        | -    | - | -         | -      | rs1030166  | intronic | 0.5961 | 0.7974  | <b>5.70E-04</b> | 0.9921 | 0.8504  | 0.3942         | 0.345  | <b>2.69E-04</b> | <b>0.0367</b>   |
| PCDHA3 | -        | -    | - | -         | -      | rs155818   | intronic | 0.602  | 0.8108  | <b>3.89E-04</b> | 0.3021 | 0.7364  | 0.116          | 0.2696 | <b>8.10E-04</b> | <b>0.007192</b> |
| PCDHA3 | -        | -    | - | -         | -      | rs246001   | intronic | 0.6057 | 0.3398  | 0.6824          | 0.376  | 0.2115  | 0.8984         | 0.8386 | 0.1796          | 0.9351          |
| PCDHA3 | -        | -    | - | -         | -      | rs56003    | intronic | 0.6209 | 0.7788  | <b>3.28E-04</b> | 0.3059 | 0.7124  | 0.1282         | 0.2885 | <b>6.17E-04</b> | <b>0.008587</b> |
| PCDHA3 | -        | -    | - | -         | -      | rs3756325  | intronic | 0.9869 | 0.7665  | <b>1.14E-04</b> | 0.3402 | 0.3546  | 0.1971         | 0.1832 | <b>5.02E-04</b> | 0.05585         |
| PCDHA2 | 1.43E-04 | TRUE | 5 | 140174443 | 2620   | rs269554   | intronic | 0.172  | 0.9766  | 0.5146          | 0.4041 | 0.1262  | 0.6255         | 0.8182 | 0.07802         | 0.8124          |

|          |          |      |    |           |       |            |            |                 |                 |                 |               |                 |                 |                 |                 |                 |
|----------|----------|------|----|-----------|-------|------------|------------|-----------------|-----------------|-----------------|---------------|-----------------|-----------------|-----------------|-----------------|-----------------|
| PCDHA2   | -        | -    | -  | -         | -     | rs269546   | intronic   | 0.1805          | 0.9864          | 0.4715          | 0.4044        | 0.09991         | 0.6143          | 0.804           | 0.06408         | 0.7864          |
| PCDHA2   | -        | -    | -  | -         | -     | rs155806   | intronic   | 0.2168          | 0.09095         | 0.7046          | 0.7259        | 0.2123          | 0.7691          | 0.8478          | 0.08984         | 0.9226          |
| PCDHA2   | -        | -    | -  | -         | -     | rs246037   | intronic   | 0.2583          | 0.5916          | 0.6191          | 0.7621        | 0.501           | <b>0.03542</b>  | 0.3006          | 0.4306          | <b>0.009449</b> |
| PCDHA2   | -        | -    | -  | -         | -     | rs251370   | intronic   | 0.2676          | 0.6527          | <b>1.46E-04</b> | 0.94          | 0.4745          | 0.05209         | 0.345           | <b>2.84E-06</b> | <b>0.007411</b> |
| PCDHA2   | -        | -    | -  | -         | -     | rs251373   | intronic   | 0.2703          | 0.6915          | <b>1.37E-04</b> | 0.959         | 0.4968          | 0.05143         | 0.3177          | <b>2.32E-06</b> | <b>0.005523</b> |
| PCDHA2   | -        | -    | -  | -         | -     | rs7732179  | intronic   | 0.4129          | 0.8263          | <b>0.001359</b> | 0.9532        | 0.9488          | 0.2113          | 0.2028          | <b>4.25E-04</b> | <b>0.02154</b>  |
| PCDHA2   | -        | -    | -  | -         | -     | rs31874    | intronic   | 0.5322          | 0.11            | <b>0.01766</b>  | 0.5221        | 0.1389          | 0.9701          | 0.8483          | <b>9.46E-04</b> | 0.2634          |
| PCDHA2   | -        | -    | -  | -         | -     | rs3822346  | exonic     | 0.5805          | 0.7103          | <b>6.72E-04</b> | 0.9879        | 0.851           | 0.3846          | 0.2975          | <b>3.23E-04</b> | <b>0.03016</b>  |
| PCDHA2   | -        | -    | -  | -         | -     | rs10038174 | intronic   | 0.5817          | 0.652           | <b>8.43E-04</b> | 0.9749        | 0.9338          | 0.4384          | 0.2682          | <b>2.64E-04</b> | <b>0.03247</b>  |
| PCDHA2   | -        | -    | -  | -         | -     | rs3756338  | intronic   | 0.5832          | 0.6992          | <b>6.68E-04</b> | 0.9808        | 0.8712          | 0.3875          | 0.3033          | <b>3.52E-04</b> | <b>0.03019</b>  |
| PCDHA2   | -        | -    | -  | -         | -     | rs1030166  | intronic   | 0.5961          | 0.7974          | <b>5.70E-04</b> | 0.9921        | 0.8504          | 0.3942          | 0.345           | <b>2.69E-04</b> | <b>0.0367</b>   |
| PCDHA2   | -        | -    | -  | -         | -     | rs155818   | intronic   | 0.602           | 0.8108          | <b>3.89E-04</b> | 0.3021        | 0.7364          | 0.116           | 0.2696          | <b>8.10E-04</b> | <b>0.007192</b> |
| PCDHA2   | -        | -    | -  | -         | -     | rs246001   | intronic   | 0.6057          | 0.3398          | 0.6824          | 0.376         | 0.2115          | 0.8984          | 0.8386          | 0.1796          | 0.9351          |
| PCDHA2   | -        | -    | -  | -         | -     | rs56003    | intronic   | 0.6209          | 0.7788          | <b>3.28E-04</b> | 0.3059        | 0.7124          | 0.1282          | 0.2885          | <b>6.17E-04</b> | <b>0.008587</b> |
| PCDHA2   | -        | -    | -  | -         | -     | rs3756325  | intronic   | 0.9869          | 0.7665          | <b>1.14E-04</b> | 0.3402        | 0.3546          | 0.1971          | 0.1832          | <b>5.02E-04</b> | <b>0.05585</b>  |
| ASB18    | 1.47E-04 | TRUE | 2  | 237103514 | 69475 | rs13386897 | downstream | <b>2.47E-06</b> | 0.8287          | 0.1551          | 0.3079        | <b>0.005644</b> | <b>0.0215</b>   | 0.473           | <b>0.0262</b>   | 0.9886          |
| ASB18    | -        | -    | -  | -         | -     | rs10177957 | exonic     | <b>5.23E-06</b> | 0.9639          | 0.173           | 0.3605        | <b>0.006755</b> | <b>0.03403</b>  | 0.6251          | <b>0.03719</b>  | 0.9019          |
| ASB18    | -        | -    | -  | -         | -     | rs1530952  | intronic   | <b>2.57E-05</b> | 0.2764          | 0.5421          | 0.4565        | <b>0.009487</b> | 0.08064         | 0.3651          | 0.1312          | 0.6673          |
| ASB18    | -        | -    | -  | -         | -     | rs6757571  | intronic   | <b>1.73E-04</b> | 0.1497          | 0.7752          | 0.3153        | <b>0.004396</b> | 0.07963         | 0.6301          | 0.3757          | 0.7732          |
| ASB18    | -        | -    | -  | -         | -     | rs6431443  | intronic   | <b>3.47E-04</b> | 0.8836          | 0.5678          | 0.3374        | <b>0.04232</b>  | 0.2846          | 0.3886          | 0.2773          | 0.4349          |
| ASB18    | -        | -    | -  | -         | -     | rs6756597  | exonic     | <b>0.004905</b> | 0.1725          | 0.796           | 0.7264        | 0.05103         | 0.6014          | 0.2579          | <b>0.04511</b>  | 0.8992          |
| ASB18    | -        | -    | -  | -         | -     | rs2015983  | intronic   | <b>0.0456</b>   | 0.3355          | 0.8039          | 0.214         | 0.4633          | 0.2372          | 0.523           | 0.9838          | 0.502           |
| ASB18    | -        | -    | -  | -         | -     | rs1377446  | intronic   | 0.2548          | 0.8725          | 0.09521         | 0.952         | 0.5182          | 0.5436          | 0.6881          | 0.7001          | 0.9632          |
| ASB18    | -        | -    | -  | -         | -     | rs13390159 | intronic   | 0.7346          | 0.3824          | 0.5828          | 0.8681        | 0.1266          | 0.2073          | 0.2332          | 0.8883          | 0.9934          |
| HAS3     | 1.54E-04 | TRUE | 16 | 69140128  | 11443 | rs3785079  | intronic   | <b>0.02107</b>  | 0.2826          | 0.6739          | 0.5005        | <b>1.98E-04</b> | 0.734           | 0.6707          | 0.9628          | 0.4028          |
| HAS3     | -        | -    | -  | -         | -     | rs2232228  | exonic     | <b>0.04286</b>  | <b>0.007179</b> | 0.7189          | 0.5688        | <b>7.15E-06</b> | 0.3812          | <b>0.02884</b>  | 0.4314          | <b>0.008064</b> |
| HAS3     | -        | -    | -  | -         | -     | rs8047014  | upstream   | 0.07218         | <b>0.03269</b>  | 0.8194          | 0.226         | <b>1.32E-04</b> | 0.9262          | 0.9125          | 0.5256          | 0.05329         |
| ZNF101   | 1.59E-04 | TRUE | 19 | 19779662  | 11477 | rs7247433  | downstream | 0.6669          | 0.7983          | 0.3423          | 0.45          | 0.07522         | 0.4211          | <b>0.04665</b>  | 0.6371          | <b>0.04472</b>  |
| ZNF101   | -        | -    | -  | -         | -     | rs2304130  | intronic   | 0.7992          | 0.3232          | 0.669           | 0.3771        | 0.672           | 0.8025          | <b>0.003638</b> | 0.3919          | <b>9.71E-06</b> |
| PPP1R2P3 | 1.61E-04 | TRUE | 5  | 156277548 | 1992  | rs4704810  | upstream   | <b>0.02801</b>  | 0.193           | 0.7231          | 0.5071        | 0.8873          | 0.5869          | 0.4176          | 0.1802          | 0.07457         |
| PPP1R2P3 | -        | -    | -  | -         | -     | rs4476703  | ncRNA      | 0.2789          | 0.6061          | 0.5614          | <b>0.0284</b> | 0.3274          | <b>5.59E-04</b> | 0.8088          | 0.5761          | <b>9.42E-06</b> |
| PPP1R2P3 | -        | -    | -  | -         | -     | rs10060710 | downstream | 0.5482          | 0.7822          | 0.4348          | 0.05966       | 0.4248          | <b>0.001767</b> | 0.6839          | 0.5201          | <b>1.87E-05</b> |
| FEN1     | 1.65E-04 | TRUE | 11 | 61560108  | 4607  | rs695867   | intronic   | 0.1076          | 0.4374          | 0.7756          | 0.3997        | 0.1468          | 0.09912         | 0.4622          | 0.4798          | 0.0539          |

|         |          |      |    |          |        |            |          |         |         |        |         |          |         |          |         |         |
|---------|----------|------|----|----------|--------|------------|----------|---------|---------|--------|---------|----------|---------|----------|---------|---------|
| FEN1    | -        | -    | -  | -        | -      | rs102275   | intronic | 0.4241  | 0.6986  | 0.9772 | 0.2076  | 0.04303  | 0.4165  | 6.51E-06 | 0.3705  | 0.01715 |
| FEN1    | -        | -    | -  | -        | -      | rs412334   | 5UTR     | 0.5315  | 0.04424 | 0.442  | 0.9345  | 0.5911   | 0.3789  | 0.06239  | 0.301   | 0.7839  |
| MIR611  | 1.65E-04 | TRUE | 11 | 61559966 | 68     | rs695867   | intronic | 0.1076  | 0.4374  | 0.7756 | 0.3997  | 0.1468   | 0.09912 | 0.4622   | 0.4798  | 0.0539  |
| MIR611  | -        | -    | -  | -        | -      | rs102275   | intronic | 0.4241  | 0.6986  | 0.9772 | 0.2076  | 0.04303  | 0.4165  | 6.51E-06 | 0.3705  | 0.01715 |
| MIR611  | -        | -    | -  | -        | -      | rs412334   | 5UTR     | 0.5315  | 0.04424 | 0.442  | 0.9345  | 0.5911   | 0.3789  | 0.06239  | 0.301   | 0.7839  |
| DNM2    | 1.67E-04 | TRUE | 19 | 10828728 | 113859 | rs4804528  | intronic | 0.03157 | 0.7681  | 0.1921 | 0.1958  | 0.1698   | 0.7902  | 0.1504   | 0.05531 | 0.5621  |
| DNM2    | -        | -    | -  | -        | -      | rs4804523  | intronic | 0.04364 | 0.7893  | 0.367  | 0.1006  | 0.007919 | 0.9186  | 0.6791   | 0.7825  | 0.04678 |
| DNM2    | -        | -    | -  | -        | -      | rs12974306 | intronic | 0.04808 | 0.8278  | 0.6042 | 0.3159  | 0.09428  | 0.8086  | 0.2042   | 0.8379  | 0.2581  |
| DNM2    | -        | -    | -  | -        | -      | rs7247567  | intronic | 0.0604  | 0.8542  | 0.4653 | 0.04002 | 0.002847 | 0.8967  | 0.8851   | 0.9333  | 0.03646 |
| DNM2    | -        | -    | -  | -        | -      | rs10404348 | intronic | 0.06073 | 0.9344  | 0.3047 | 0.1589  | 0.01078  | 0.9715  | 0.8548   | 0.8939  | 0.08716 |
| DNM2    | -        | -    | -  | -        | -      | rs2043332  | intronic | 0.0871  | 0.536   | 0.2756 | 0.1703  | 0.1096   | 0.7182  | 0.1121   | 0.03938 | 0.304   |
| DNM2    | -        | -    | -  | -        | -      | rs11881315 | intronic | 0.221   | 0.3192  | 0.3849 | 0.7057  | 0.1112   | 0.7115  | 3.05E-06 | 0.03572 | 0.67    |
| DNM2    | -        | -    | -  | -        | -      | rs3760781  | upstream | 0.2492  | 0.1677  | 0.9382 | 0.5944  | 0.3132   | 0.3131  | 2.90E-04 | 0.3736  | 0.4357  |
| DNM2    | -        | -    | -  | -        | -      | rs4334414  | intronic | 0.8992  | 0.9775  | 0.7445 | 0.08525 | 0.6641   | 0.4224  | 0.3655   | 0.6707  | 0.9155  |
| DNM2    | -        | -    | -  | -        | -      | rs11672431 | exonic   | 0.9145  | 0.3328  | 0.6379 | 0.03874 | 0.1204   | 0.3157  | 0.4984   | 0.5622  | 0.2097  |
| TMEM258 | 1.69E-04 | TRUE | 11 | 61556601 | 3485   | rs695867   | intronic | 0.1076  | 0.4374  | 0.7756 | 0.3997  | 0.1468   | 0.09912 | 0.4622   | 0.4798  | 0.0539  |
| TMEM258 | -        | -    | -  | -        | -      | rs102275   | intronic | 0.4241  | 0.6986  | 0.9772 | 0.2076  | 0.04303  | 0.4165  | 6.51E-06 | 0.3705  | 0.01715 |
| TMEM258 | -        | -    | -  | -        | -      | rs174537   | intronic | 0.5105  | 0.8084  | 0.929  | 0.157   | 0.05822  | 0.4036  | 0.4902   | 0.4465  | 0.01814 |
| TMEM258 | -        | -    | -  | -        | -      | rs412334   | 5UTR     | 0.5315  | 0.04424 | 0.442  | 0.9345  | 0.5911   | 0.3789  | 0.06239  | 0.301   | 0.7839  |
| VPS4A   | 1.74E-04 | TRUE | 16 | 69345286 | 13661  | rs246129   | 3UTR     | 0.04314 | 0.01158 | 0.7735 | 0.714   | 4.06E-05 | 0.4269  | 0.02144  | 0.966   | 0.00443 |
| VPS4A   | -        | -    | -  | -        | -      | rs153050   | intronic | 0.06378 | 0.8522  | 0.9179 | 0.497   | 6.09E-06 | 0.2841  | 0.01775  | 0.6722  | 0.3665  |
| VPS4A   | -        | -    | -  | -        | -      | rs12258    | 3UTR     | 0.3105  | 0.1679  | 0.3671 | 0.8741  | 0.1439   | 0.7094  | 0.5366   | 0.2689  | 0.4724  |
| VPS4A   | -        | -    | -  | -        | -      | rs1127231  | exonic   | 0.8817  | 0.03402 | 0.9768 | 0.938   | 0.1605   | 0.3116  | 0.2159   | 0.3674  | 0.3851  |

TABLE S10: Annotation of the genes/genetic regions identified by MGAS by reference to the Catalog of Published Genome-wide Association Studies (<http://www.genome.gov/gwastudies/>)

|                 |                                                                                                                                                                                                          |
|-----------------|----------------------------------------------------------------------------------------------------------------------------------------------------------------------------------------------------------|
| gene name       | Gene name                                                                                                                                                                                                |
| unique (y/n)    | Does the gene overlap with other genes identified in the MGAS analysis?<br>That is: do some of the SNPs that represent this gene also represent other genes that were significant in this MGAS analysis? |
| gene cluster nr | Overlapping genes are assigned to a cluster; these clusters are given an arbitrary number                                                                                                                |

| gene name | unique (y/n) | gene-cluster nr | previously related to metabolic (related) traits (Y/N)?                                            | Reported in original paper |
|-----------|--------------|-----------------|----------------------------------------------------------------------------------------------------|----------------------------|
| PCDHA1    | N            | 1               | Y: Visceral adipose tissue                                                                         | N                          |
| PCDHA10   | N            | 1               |                                                                                                    |                            |
| PCDHA11   | N            | 1               |                                                                                                    |                            |
| PCDHA12   | N            | 1               |                                                                                                    |                            |
| PCDHA2    | N            | 1               |                                                                                                    |                            |
| PCDHA3    | N            | 1               |                                                                                                    |                            |
| PCDHA4    | N            | 1               |                                                                                                    |                            |
| PCDHA5    | N            | 1               |                                                                                                    |                            |
| PCDHA6    | N            | 1               |                                                                                                    |                            |
| PCDHA7    | N            | 1               |                                                                                                    |                            |
| PCDHA8    | N            | 1               |                                                                                                    |                            |
| PCDHA9    | N            | 1               |                                                                                                    |                            |
| FEN1      | N            | 2               | Y: Oleic Palmitoleic and Stearic acid plasma levels                                                | N                          |
| MIR611    | N            | 2               |                                                                                                    |                            |
| TMEM258   | N            | 2               |                                                                                                    |                            |
| EDC4      | N            | 3               | Y: metabolic syndrome, coronary heart disease                                                      | N                          |
| NRN1L     | N            | 3               |                                                                                                    |                            |
| NUTF2     | N            | 3               |                                                                                                    |                            |
| PSKH1     | N            | 3               |                                                                                                    |                            |
| GLT8D1    | N            | 4               | N: osteoarthritis, bipolar, combination of: autism, bipolar, ADHD, major depression, schizophrenia |                            |
| GNL3      | N            | 4               |                                                                                                    |                            |

|           |   |    |                                                              |   |
|-----------|---|----|--------------------------------------------------------------|---|
| SNORD19B  | N | 4  |                                                              |   |
| SNORD69   | N | 4  |                                                              |   |
| C12orf43  | N | 5  | Y: e.g. metabolic traits, LDL, C-reactive protein            | N |
| HNF1A     | N | 5  |                                                              |   |
| OASL      | N | 5  |                                                              |   |
| CELSR2    | N | 6  | Y: e.g., LCL, total cholesterol, lipid metabolism phenotypes | Y |
| PSRC1     | N | 6  |                                                              |   |
| PVRL2     | N | 7  | Y: e.g., HDL, waist-to-hip ratio                             | Y |
| TOMM40    | N | 7  |                                                              |   |
| FADS1     | N | 8  | Y: Oleic Palmitoleic and Stearic acid plasma levels          | Y |
| MIR1908   | N | 8  |                                                              |   |
| EXOC3L1   | N | 9  | Y: coronary heart disease                                    | N |
| HSF4      | N | 9  |                                                              |   |
| KIAA0895L | N | 9  |                                                              |   |
| NOL3      | N | 9  |                                                              |   |
| MADD      | N | 10 | Y: e.g. proinsulin, fasting glucose                          | Y |
| NR1H3     | N | 10 |                                                              |   |
| C16orf86  | N | 11 | Y: obesity related traits                                    | N |
| ENKD1     | N | 11 |                                                              |   |
| PARD6A    | N | 11 |                                                              |   |
| FHOD1     | N | 12 | Y: lipoproteins, HDL                                         | N |
| LRRC29    | N | 12 |                                                              |   |
| TMEM208   | N | 12 |                                                              |   |
| APOB      | Y | 13 | Y: LDL                                                       | Y |
| AR        | Y | 14 | Y: LDL                                                       | Y |
| ASB18     | Y | 15 | Y: response to statin therapy                                | N |
| ATP13A5   | Y | 16 | Y: triglycerides                                             | N |
| CETP      | Y | 17 | Y: e.g., HDL, metabolites, metabolic syndrome                | Y |
| CR1L      | Y | 18 | Y: LDL, Erythrocyte sedimentation rate                       | Y |
| CRP       | Y | 19 | Y: C-reactive protein, metabolic traits                      | Y |
| CTCF      | Y | 20 | Y: HDL                                                       | N |
| CTCFI     | Y | 21 | Y: Type 2 diabetes, response to statine therapy              | N |
| DNM2      | Y | 22 | Y: coronary heart disease                                    | N |



|           |   |                                                                           |   |
|-----------|---|---------------------------------------------------------------------------|---|
| DPEP2     | Y | 23 Y: HDL                                                                 | N |
| DPEP3     | Y | 24 Y: HDL                                                                 | Y |
| FAM222B   | Y | 25 No phenotypes yet reported to our knowledge                            | N |
| G6PC2     | Y | 26 Y: e.g., fasting glucose, metabolite levels, metabolic syndrome        | Y |
| GCKR      | Y | 27 Y: e.g., glycemic traits, fasting glucose, metabolic syndrome          | Y |
| HAS3      | Y | 28 N: ADHD                                                                | N |
| HNF1A-AS1 | Y | 29 Y: LDL, C-reactive protein, Type 2 diabetes                            | N |
| HNF4A     | Y | 30 Y: HDL, C-reactive protein, Type 2 diabetes                            | N |
| IGSF5     | Y | 31 Y: coronary heart disease                                              | N |
| LDLR      | Y | 32 Y: LDL, metabolite levels, metabolic syndrome                          | Y |
| LEPR      | Y | 33 Y: obesity, c-reactive proteins, metabolic traits                      | Y |
| NFATC3    | Y | 34 Y: HDL                                                                 | N |
| PLA2G15   | Y | 35 Y: HDL, LDL                                                            | N |
| PPP1R2P3  | Y | 36 Y: triglycerides                                                       | N |
| PRMT7     | Y | 37 Y: HDL, lipoproteins, schizophrenia                                    | N |
| PTPRJ     | Y | 38 N: D-dimer levels, Acute lymphoblastic leukemia*                       | N |
| S1PR2     | Y | 39 N: thiazide-induced adverse metabolic effects in hypertensive patients | N |
| SMEK2     | Y | 40 Y: metabolic syndrome                                                  | N |
| TBL2      | Y | 41 Y: triglycerides                                                       | N |
| TFAP2B    | Y | 42 Y: obesity, metabolic syndrome, BMI                                    | N |
| VPS4A     | Y | 43 Y: HDL, lipoproteins                                                   | N |
| ZNF101    | Y | 44 Y: LDL, triglycerides                                                  | N |

\* Note: Glucose metabolism side effects of acute lymphoblastic leukemia have been reported

Table S11: Genome-wide significant SNPs identified by TATES using the 9 continuous metabolic phenotypes

Color coding p-values:   
red <.000001   
yellow .000001-.00001   
green .00001-.0001   
blue .0001-.001   
black font .001-.05   
grey font >.05

| CHRnr | location  | rsnr       | gene_feature   | closest gene*                                               | BMI     | CRP      | DBP    | GLU      | HDL      | INS     | LDL      | SBP    | TG       | TATES p-value |
|-------|-----------|------------|----------------|-------------------------------------------------------------|---------|----------|--------|----------|----------|---------|----------|--------|----------|---------------|
| 1     | 109818530 | rs646776   | downstream     | CELSR2, PSRC1, SORT1                                        | 0.1401  | 2.21E-01 | 0.6273 | 8.05E-01 | 1.42E-01 | 0.07783 | 2.19E-12 | 0.5509 | 5.50E-01 | 1.84E-11      |
| 1     | 159642349 | rs1811472  | intergenic     | OR10J6P,CRPP1                                               | 0.0402  | 2.27E-15 | 0.4431 | 3.39E-01 | 2.34E-02 | 0.3052  | 7.18E-01 | 0.1728 | 7.71E-01 | 1.91E-14      |
| 1     | 159647988 | rs12093699 | intergenic     | OR10J6P,CRPP1, CRP                                          | 0.1673  | 1.62E-13 | 0.6687 | 7.37E-01 | 9.89E-01 | 0.5228  | 6.10E-01 | 0.1764 | 7.33E-01 | 1.36E-12      |
| 1     | 159652939 | rs2592887  | intergenic     | OR10J6P,CRPP1                                               | 0.06223 | 1.51E-16 | 0.3529 | 1.90E-01 | 3.41E-02 | 0.09759 | 8.22E-01 | 0.1163 | 5.97E-01 | 1.27E-15      |
| 1     | 159678816 | rs2794520  | downstream     | CRPP1, CRP                                                  | 0.5436  | 2.92E-22 | 0.5156 | 5.87E-01 | 2.57E-01 | 0.3577  | 5.44E-01 | 0.2896 | 6.74E-01 | 2.46E-21      |
| 1     | 159700039 | rs11265260 | intergenic     | CRP, RPL27P2                                                | 0.3323  | 4.45E-09 | 0.1153 | 8.43E-01 | 2.75E-02 | 0.6661  | 7.82E-02 | 0.566  | 5.81E-01 | 3.74E-08      |
| 2     | 21206183  | rs6754295  | intergenic     | APOB, C2orf43                                               | 0.3326  | 5.01E-02 | 0.9046 | 1.00E-01 | 3.78E-06 | 0.8925  | 1.40E-08 | 0.5249 | 9.47E-08 | 1.18E-07      |
| 2     | 27730940  | rs1260326  | exonic         | GCKR, IFT172, FNDC4, C2orf16, ZNF512, PPM1G, NRBP1, KRTCAP3 | 0.492   | 7.31E-02 | 0.5136 | 3.90E-01 | 1.86E-01 | 0.4225  | 3.07E-01 | 0.3802 | 3.56E-10 | 3.00E-09      |
| 2     | 169763148 | rs560887   | intonic        | SPC25, FGQTL1, G6PC2, ABCB11                                | 0.6882  | 4.08E-01 | 0.9984 | 5.69E-10 | 7.24E-01 | 0.9469  | 5.26E-01 | 0.9864 | 5.29E-01 | 4.79E-09      |
| 6     | 32765671  | rs6932969  | intergenic     | HLA-DRB,HLA-DQB1                                            | 0.3091  | 1.57E-01 | 0.5939 | 5.30E-01 | 3.91E-03 | 0.5943  | 2.99E-11 | 0.705  | 7.34E-01 | 2.51E-10      |
| 7     | 114940068 | rs7800941  | regulatory reg | MDFIC                                                       | 0.03904 | 7.92E-01 | 0.7859 | 4.49E-01 | 4.99E-02 | 0.4561  | 8.98E-01 | 0.4445 | 5.03E-09 | 4.24E-08      |
| 12    | 121388962 | rs2650000  | intergenic     | HNF1A, LEF1, RPL12P33,NCRNA00262                            | 0.9205  | 2.71E-11 | 0.2698 | 8.53E-01 | 6.27E-01 | 0.6767  | 3.70E-01 | 0.5234 | 7.09E-01 | 2.28E-10      |
| 12    | 121403724 | rs7953249  | downstream     | HNF1A, C12orf43, OASL, HNF1A-AS1, AC079602                  | 0.5548  | 1.44E-09 | 0.4425 | 9.05E-01 | 4.76E-01 | 0.5462  | 2.96E-01 | 0.6843 | 9.39E-01 | 1.21E-08      |
| 12    | 121431225 | rs1169300  | intronic       | HNF1A                                                       | 0.6507  | 2.01E-09 | 0.6845 | 8.95E-01 | 8.55E-01 | 0.3737  | 1.91E-01 | 0.7302 | 6.95E-01 | 1.69E-08      |
| 12    | 121435427 | rs2464196  | exonic         | HNF1A, C12orf43, RP11-216P16                                | 0.5168  | 4.78E-09 | 0.6792 | 8.52E-01 | 7.41E-01 | 0.2968  | 3.05E-01 | 0.6581 | 7.05E-01 | 4.03E-08      |
| 15    | 58683366  | rs1532085  | intronic       | LIPC, ALDH1A2, RPL28P4                                      | 0.1369  | 9.61E-01 | 0.7193 | 1.32E-01 | 1.77E-10 | 0.4153  | 6.20E-01 | 0.5251 | 2.09E-01 | 1.49E-09      |
| 16    | 56985139  | rs9989419  | regulatory reg | HERPUD1,CETP                                                | 0.4489  | 5.83E-01 | 0.8875 | 9.64E-02 | 2.21E-09 | 0.5066  | 5.87E-01 | 0.9386 | 2.36E-01 | 1.86E-08      |
| 16    | 56993324  | rs3764261  | upstream       | HERPUD1, CETP, AC012181                                     | 0.7867  | 2.13E-01 | 0.5447 | 2.74E-01 | 6.97E-29 | 0.5155  | 1.55E-01 | 0.9677 | 7.76E-02 | 5.87E-28      |
| 16    | 57005479  | rs1532624  | intronic       | HERPUD1, CETP, SLC12A3, NLRC5,                              | 0.1196  | 3.99E-01 | 0.719  | 1.25E-01 | 2.97E-22 | 0.08552 | 2.53E-01 | 0.8547 | 1.90E-02 | 2.50E-21      |
| 16    | 57006590  | rs7499892  | intronic       | CETP                                                        | 0.05331 | 3.72E-01 | 0.2021 | 5.81E-02 | 2.29E-16 | 0.6125  | 8.72E-01 | 0.7906 | 6.59E-01 | 1.93E-15      |

\* Information obtained from Ensembl.org

## Table S12: Genome-wide significant genes identified by GATES on

- a) the univariate sum score of five metabolic syndrome risk factors and
- b) the individual five dichotomous metabolic risk factors

|                        |            |                |
|------------------------|------------|----------------|
| Color coding p-values: | red        | <.000001       |
|                        | yellow     | .000001-.00001 |
|                        | green      | .00001-.0001   |
|                        | blue       | .0001-.001     |
|                        | black font | .001-.05       |
|                        | grey font  | >.05           |

| Symbol | GATES PValue | IsSignificant | Chromosome | Start_Position | Length | SNP | Position | GeneFeature | IsGATESKeySNP | P |
|--------|--------------|---------------|------------|----------------|--------|-----|----------|-------------|---------------|---|
|--------|--------------|---------------|------------|----------------|--------|-----|----------|-------------|---------------|---|

### Results Gates on the sum of metabolic syndrome risk factors

Sum of endorsed metabolic syndrome risk factors (see description individual factors below)

### SUM 5 metabolic syndrome criteria

No hits

### Results Gates on the dichotomous risk factors underlying the sum score

Cut off criteria for metabolic syndrom risk factors were obtained from this website <http://www.ncbi.nlm.nih.gov/pmc/articles/PMC1880831/>

For TG, HDL, GLU and blood pressure, we used the ATP III criteria for Clinical Identification of the Metabolic Syndrome

For BMI, we used the AACE Clinical Criteria for Diagnosis of the Insulin Resistance Syndrome

For a full description, see Online Methods.

### BMI-dichotomous

No hits

### TG-dichotomous

|      |          |      |   |          |       |           |          |            |   |          |
|------|----------|------|---|----------|-------|-----------|----------|------------|---|----------|
| GCKR | 1.31E-06 | true | 2 | 27719705 | 26846 | rs1260326 | 27730940 | exonic     | Y | 4.02E-07 |
| -    | -        | -    | - | -        | -     | rs780094  | 27741237 | intronic   | N | 1.32E-06 |
| -    | -        | -    | - | -        | -     | rs1260333 | 27748624 | downstream | N | 9.56E-04 |
| -    | -        | -    | - | -        | -     | rs780092  | 27743154 | intronic   | N | 0.004631 |
| -    | -        | -    | - | -        | -     | rs780090  | 27718474 | upstream   | N | 0.09013  |

### HDL-dichotomous

|      |          |      |    |          |       |           |          |          |   |          |
|------|----------|------|----|----------|-------|-----------|----------|----------|---|----------|
| CETP | 1.78E-11 | true | 16 | 56995834 | 21923 | rs3764261 | 56993324 | upstream | Y | 4.03E-12 |
| -    | -        | -    | -  | -        | -     | rs1532624 | 57005479 | intronic | N | 2.35E-07 |
| -    | -        | -    | -  | -        | -     | rs7499892 | 57006590 | intronic | N | 2.70E-07 |
| -    | -        | -    | -  | -        | -     | rs4784744 | 57011185 | intronic | N | 0.01433  |
| -    | -        | -    | -  | -        | -     | rs5882    | 57016092 | exonic   | N | 0.04149  |

### GLU-dichotomous

No hits

### BLOOD PRESSURE - dichotomous

|          |          |      |    |          |       |           |          |          |   |          |
|----------|----------|------|----|----------|-------|-----------|----------|----------|---|----------|
| DTX3     | 5.70E-07 | true | 12 | 57998404 | 5184  | rs812315  | 57993490 | intronic | Y | 5.71E-07 |
| PIP4K2C  | 5.70E-07 | true | 12 | 57984941 | 12271 | rs812315  | 57993490 | intronic | Y | 5.71E-07 |
| KIAA0895 | 9.95E-07 | true | 7  | 36363758 | 43121 | rs197328  | 36396358 | intronic | Y | 3.68E-07 |
| -        | -        | -    | -  | -        | -     | rs197324  | 36387944 | intronic | N | 6.78E-07 |
| -        | -        | -    | -  | -        | -     | rs6976779 | 36427461 | intronic | N | 1.54E-05 |
| -        | -        | -    | -  | -        | -     | rs3779230 | 36374799 | intronic | N | 0.198    |



Table S13: Genome-wide significant genes identified by GATES on the 9 continuous metabolic phenotypes separately

Color coding p-values:

- red <.000001
- yellow .000001-.00001
- green .00001-.0001
- blue .0001-.001
- black font .001-.05
- grey font >.05

| Symbol    | GATES Gene- p-value | IsSignificant | Chromosome | Start_Position | Length | SNP        | Position  | GeneFeature | IsGATESKeySNP | SNP p-value |
|-----------|---------------------|---------------|------------|----------------|--------|------------|-----------|-------------|---------------|-------------|
| BMI       |                     |               |            |                |        |            |           |             |               |             |
| TFAP2B    | 2.14E-06            | true          | 6          | 50786438       | 28889  | rs987237   | 50803050  | intronic    | Y             | 7.37E-07    |
| CRP       |                     |               |            |                |        |            |           |             |               |             |
| CRP       | 5.51E-22            | true          | 1          | 159682078      | 2302   | rs2794520  | 159678816 | downstream  | Y             | 2.92E-22    |
| -         | -                   | -             | -          | -              | -      | rs2808630  | 159680868 | downstream  | N             | 1.59E-01    |
| HNF1A-AS1 | 2.85E-09            | true          | 12         | 121407640      | 2456   | rs7953249  | 121403724 | downstream  | Y             | 1.44E-09    |
| -         | -                   | -             | -          | -              | -      | rs2254779  | 121409242 | ncRNA       | N             | 1.34E-01    |
| HNF1A     | 6.37E-09            | true          | 12         | 121416548      | 23767  | rs1169300  | 121431225 | intronic    | Y             | 2.01E-09    |
| -         | -                   | -             | -          | -              | -      | rs2464196  | 121435427 | exonic      | N             | 4.78E-09    |
| -         | -                   | -             | -          | -              | -      | rs1169302  | 121432302 | intronic    | N             | 1.20E-07    |
| -         | -                   | -             | -          | -              | -      | rs735396   | 121438844 | intronic    | N             | 2.13E-07    |
| -         | -                   | -             | -          | -              | -      | rs1169307  | 121438382 | intronic    | N             | 2.76E-05    |
| C12orf43  | 1.48E-08            | true          | 12         | 121440224      | 14082  | rs2464196  | 121435427 | exonic      | Y             | 4.78E-09    |
| -         | -                   | -             | -          | -              | -      | rs735396   | 121438844 | intronic    | N             | 2.13E-07    |
| -         | -                   | -             | -          | -              | -      | rs1169307  | 121438382 | intronic    | N             | 2.76E-05    |
| -         | -                   | -             | -          | -              | -      | rs12819210 | 121458400 | exonic      | N             | 9.32E-02    |
| OASL      | 1.70E-06            | true          | 12         | 121458094      | 18952  | rs10774580 | 121476423 | intronic    | Y             | 4.97E-07    |
| -         | -                   | -             | -          | -              | -      | rs7965349  | 121471931 | intronic    | N             | 9.29E-04    |
| -         | -                   | -             | -          | -              | -      | rs2859394  | 121479265 | upstream    | N             | 6.54E-02    |
| -         | -                   | -             | -          | -              | -      | rs12819210 | 121458400 | exonic      | N             | 9.32E-02    |
| LEPR      | 1.19E-05            | true          | 1          | 65991371       | 109741 | rs1892534  | 66105944  | downstream  | Y             | 4.77E-07    |
| -         | -                   | -             | -          | -              | -      | rs2025805  | 65949878  | intronic    | N             | 1.50E-03    |

|   |   |   |   |   |   |   |            |          |          |   |          |
|---|---|---|---|---|---|---|------------|----------|----------|---|----------|
| - | - | - | - | - | - | - | rs4655537  | 66058801 | intronic | N | 3.23E-03 |
| - | - | - | - | - | - | - | rs12409877 | 65943872 | intronic | N | 3.60E-03 |
| - | - | - | - | - | - | - | rs6588147  | 65935494 | intronic | N | 0.004121 |
| - | - | - | - | - | - | - | rs1137100  | 66036441 | exonic   | N | 0.005778 |
| - | - | - | - | - | - | - | rs10493380 | 66046117 | intronic | N | 0.009921 |
| - | - | - | - | - | - | - | rs1782754  | 65993348 | intronic | N | 0.01166  |
| - | - | - | - | - | - | - | rs1022981  | 66000034 | intronic | N | 0.01186  |
| - | - | - | - | - | - | - | rs1171269  | 65996802 | intronic | N | 0.012    |
| - | - | - | - | - | - | - | rs3828034  | 66062325 | intronic | N | 0.01439  |
| - | - | - | - | - | - | - | rs3790426  | 66043019 | intronic | N | 0.135    |
| - | - | - | - | - | - | - | rs6673324  | 66031063 | intronic | N | 0.1814   |
| - | - | - | - | - | - | - | rs9436297  | 65888854 | intronic | N | 0.2146   |
| - | - | - | - | - | - | - | rs3806318  | 65885357 | upstream | Y | 0.2579   |
| - | - | - | - | - | - | - | rs1137101  | 66058513 | exonic   | N | 0.2595   |
| - | - | - | - | - | - | - | rs2154380  | 66057441 | intronic | N | 0.272    |
| - | - | - | - | - | - | - | rs1171279  | 65988493 | intronic | N | 0.46     |
| - | - | - | - | - | - | - | rs3790433  | 65894342 | intronic | N | 0.6308   |
| - | - | - | - | - | - | - | rs970467   | 65906762 | intronic | N | 7.65E-01 |
| - | - | - | - | - | - | - | rs10158579 | 65950056 | intronic | N | 0.7728   |
| - | - | - | - | - | - | - | rs1171278  | 65988146 | intronic | N | 0.9624   |

|       |   |          |      |   |    |          |       |            |          |          |   |          |
|-------|---|----------|------|---|----|----------|-------|------------|----------|----------|---|----------|
| HDL   |   |          |      |   |    |          |       |            |          |          |   |          |
| CETP  | - | 3.07E-28 | true | - | 16 | 56995834 | 21923 | rs3764261  | 56993324 | upstream | Y | 6.97E-29 |
| -     | - | -        | -    | - | -  | -        | -     | rs1532624  | 57005479 | intronic | N | 2.97E-22 |
| -     | - | -        | -    | - | -  | -        | -     | rs7499892  | 57006590 | intronic | N | 2.29E-16 |
| -     | - | -        | -    | - | -  | -        | -     | rs4784744  | 57011185 | intronic | N | 0.001547 |
| -     | - | -        | -    | - | -  | -        | -     | rs5882     | 57016092 | exonic   | N | 0.01234  |
| DPEP3 | - | 3.06E-08 | true | - | 16 | 68009565 | 4888  | rs255049   | 68013471 | intronic | Y | 3.06E-08 |
| CTCF  | - | 3.28E-08 | true | - | 16 | 67596309 | 76780 | rs6499137  | 67671804 | 3UTR     | Y | 2.20E-08 |
| -     | - | -        | -    | - | -  | -        | -     | rs7191281  | 67655133 | intronic | N | 7.72E-06 |
| NUTF2 | - | 4.66E-08 | true | - | 16 | 67880818 | 24402 | rs2271293  | 67902070 | intronic | Y | 4.66E-08 |
| NR1H3 | - | 7.13E-08 | true | - | 11 | 47279467 | 11118 | rs7120118  | 47286290 | intronic | Y | 3.57E-08 |
| -     | - | -        | -    | - | -  | -        | -     | rs11039149 | 47276675 | intronic | N | 5.09E-04 |



|           |          |      |   |    |          |        |            |          |          |   |          |
|-----------|----------|------|---|----|----------|--------|------------|----------|----------|---|----------|
| EDC4      | 7.13E-08 | true | - | 16 | 67906925 | 11493  | rs2271293  | 67902070 | intronic | Y | 4.66E-08 |
| -         | -        | -    | - | -  | -        | -      | rs10468274 | 67922342 | upstream | N | 3.56E-07 |
| C16orf86  | 8.84E-08 | true | - | 16 | 67700716 | 1946   | rs7187476  | 67699948 | intronic | Y | 8.84E-08 |
| ENKD1     | 8.84E-08 | true | - | 16 | 67696849 | 3780   | rs7187476  | 67699948 | intronic | Y | 8.84E-08 |
| FHOD1     | 9.80E-08 | true | - | 16 | 67263291 | 18135  | rs3852700  | 67271858 | intronic | Y | 9.71E-08 |
| -         | -        | -    | - | -  | -        | -      | rs7196989  | 67259663 | intronic | N | 1.51E-07 |
| TMEM208   | 1.51E-07 | true | - | 16 | 67261015 | 2168   | rs7196989  | 67259663 | intronic | Y | 1.51E-07 |
| LRRC29    | 1.51E-07 | true | - | 16 | 67241041 | 19681  | rs7196989  | 67259663 | intronic | Y | 1.51E-07 |
| EXOC3L1   | 1.64E-07 | true | - | 16 | 67218281 | 5827   | rs868213   | 67220457 | intronic | Y | 1.64E-07 |
| PAR6A     | 1.67E-07 | true | - | 16 | 67694850 | 1832   | rs7187476  | 67699948 | intronic | Y | 8.84E-08 |
| -         | -        | -    | - | -  | -        | -      | rs6979     | 67691668 | exonic   | N | 0.0283   |
| PRMT7     | 1.70E-07 | true | - | 16 | 68344876 | 46294  | rs8058517  | 68379860 | intronic | Y | 4.37E-08 |
| -         | -        | -    | - | -  | -        | -      | rs3743742  | 68345036 | intronic | N | 0.01252  |
| -         | -        | -    | - | -  | -        | -      | rs3803650  | 68344696 | exonic   | N | 0.01556  |
| -         | -        | -    | - | -  | -        | -      | rs4783554  | 68384010 | intronic | N | 0.02467  |
| -         | -        | -    | - | -  | -        | -      | rs1111571  | 68363181 | intronic | N | 0.03644  |
| -         | -        | -    | - | -  | -        | -      | rs3961282  | 68365157 | intronic | N | 0.04415  |
| MADD      | 1.71E-07 | true | - | 11 | 47291198 | 60385  | rs7120118  | 47286290 | intronic | Y | 3.57E-08 |
| -         | -        | -    | - | -  | -        | -      | rs4752977  | 47300429 | intronic | N | 9.72E-06 |
| -         | -        | -    | - | -  | -        | -      | rs4752979  | 47339180 | intronic | N | 1.49E-05 |
| -         | -        | -    | - | -  | -        | -      | rs749067   | 47318157 | intronic | N | 3.01E-05 |
| -         | -        | -    | - | -  | -        | -      | rs2290149  | 47345916 | intronic | N | 0.009796 |
| KIAA0895L | 1.72E-07 | true | - | 16 | 67209504 | 8380   | rs868213   | 67220457 | intronic | N | 1.64E-07 |
| -         | -        | -    | - | -  | -        | -      | rs2233455  | 67207933 | exonic   | Y | 1.72E-07 |
| NOL3      | 1.72E-07 | true | - | 16 | 67204399 | 5242   | rs2233455  | 67207933 | exonic   | Y | 1.72E-07 |
| HSF4      | 1.72E-07 | true | - | 16 | 67197287 | 6562   | rs2233455  | 67207933 | exonic   | Y | 1.72E-07 |
| PLA2G15   | 1.95E-07 | true | - | 16 | 68279246 | 15716  | rs1975802  | 68285847 | intronic | Y | 1.95E-07 |
| DPEP2     | 2.36E-07 | true | - | 16 | 68021292 | 12130  | rs255052   | 68024995 | intronic | Y | 2.36E-07 |
| NRN1L     | 3.56E-07 | true | - | 16 | 67918780 | 1492   | rs10468274 | 67922342 | upstream | Y | 3.56E-07 |
| PSKH1     | 6.92E-07 | true | - | 16 | 67927174 | 36408  | rs10468274 | 67922342 | upstream | Y | 3.56E-07 |
| CTCFL     | 9.05E-07 | true | - | 20 | 56093554 | 6630   | rs11700100 | 56080049 | intronic | Y | 1.61E-07 |
| NFATC3    | 1.49E-06 | true | - | 16 | 68119268 | 143895 | rs7193701  | 68185160 | intronic | N | 3.87E-07 |
| -         | -        | -    | - | -  | -        | -      | rs9932251  | 68131732 | intronic | N | 7.49E-07 |

|           |          |      |   |    |          |        |            |          |          |   |          |
|-----------|----------|------|---|----|----------|--------|------------|----------|----------|---|----------|
| -         | -        | -    | - | -  | -        | -      | rs2418736  | 68154862 | intronic | N | 8.20E-07 |
| -         | -        | -    | - | -  | -        | -      | rs4359427  | 68202747 | intronic | Y | 8.21E-07 |
| HNF4A     | 9.90E-06 | true | - | 20 | 42984440 | 77046  | rs1800961  | 43042364 | exonic   | Y | 7.13E-07 |
| PTPRJ     | 1.36E-05 | true | - | 11 | 48002109 | 152158 | rs7946766  | 48004369 | intronic | Y | 1.35E-06 |
| -         | -        | -    | - | -  | -        | -      | rs3741410  | 48168664 | intronic | N | 9.17E-05 |
| -         | -        | -    | - | -  | -        | -      | rs1566729  | 48164721 | intronic | N | 1.80E-04 |
| -         | -        | -    | - | -  | -        | -      | rs1113480  | 48058313 | intronic | N | 9.83E-04 |
| -         | -        | -    | - | -  | -        | -      | rs6485802  | 48051442 | intronic | N | 0.002874 |
| -         | -        | -    | - | -  | -        | -      | rs2270994  | 48157869 | intronic | N | 0.008102 |
| -         | -        | -    | - | -  | -        | -      | rs10769317 | 48150712 | intronic | N | 0.008523 |
| -         | -        | -    | - | -  | -        | -      | rs4752897  | 48136990 | intronic | N | 0.01248  |
| -         | -        | -    | - | -  | -        | -      | rs1875696  | 48133526 | intronic | N | 0.01341  |
| -         | -        | -    | - | -  | -        | -      | rs1910364  | 48113232 | intronic | N | 0.0152   |
| -         | -        | -    | - | -  | -        | -      | rs12798703 | 48190777 | 3UTR     | N | 0.02903  |
| HAS3      | 1.80E-05 | true | - | 16 | 69140128 | 11443  | rs2232228  | 69143577 | exonic   | Y | 7.15E-06 |
| -         | -        | -    | - | -  | -        | -      | rs8047014  | 69135049 | upstream | N | 1.32E-04 |
| -         | -        | -    | - | -  | -        | -      | rs3785079  | 69145476 | intronic | N | 1.98E-04 |
| VPS4A     | 2.03E-05 | true | - | 16 | 69345286 | 13661  | rs153050   | 69349738 | intronic | Y | 6.09E-06 |
| -         | -        | -    | - | -  | -        | -      | rs246129   | 69341781 | 3UTR     | N | 4.06E-05 |
| APOB      | 2.16E-05 | true | - | 2  | 21224300 | 42646  | rs673548   | 21237544 | intronic | Y | 3.40E-06 |
| -         | -        | -    | - | -  | -        | -      | rs676210   | 21231524 | exonic   | N | 4.78E-06 |
| -         | -        | -    | - | -  | -        | -      | rs679899   | 21250914 | exonic   | N | 0.02394  |
| PABPC4    | 2.65E-05 | true | - | 1  | 40026484 | 16038  | rs4660293  | 40028180 | intronic | Y | 2.65E-05 |
| SNORA55   | 2.65E-05 | true | - | 1  | 40033045 | 138    | rs4660293  | 40028180 | intronic | Y | 2.65E-05 |
| SLC9A5    | 2.86E-05 | true | - | 16 | 67282854 | 23241  | rs7186310  | 67305513 | 3UTR     | Y | 2.86E-05 |
| PLEKHG4   | 3.43E-05 | true | - | 16 | 67313491 | 9913   | rs11860295 | 67316234 | exonic   | Y | 1.23E-05 |
| -         | -        | -    | - | -  | -        | -      | rs3868142  | 67320223 | exonic   | N | 2.17E-05 |
| -         | -        | -    | - | -  | -        | -      | rs8044843  | 67318242 | exonic   | N | 3.48E-05 |
| KCTD19    | 4.35E-05 | true | - | 16 | 67323392 | 37270  | rs3868142  | 67320223 | exonic   | Y | 2.17E-05 |
| -         | -        | -    | - | -  | -        | -      | rs3868143  | 67328453 | intronic | N | 2.73E-05 |
| -         | -        | -    | - | -  | -        | -      | rs4783754  | 67358816 | intronic | N | 0.01607  |
| LOC284801 | 5.22E-05 | true | - | 20 | 26167654 | 22216  | rs845785   | 26194104 | upstream | Y | 2.65E-05 |
| -         | -        | -    | - | -  | -        | -      | rs12625395 | 26182690 | ncRNA    | N | 0.02154  |

|         |          |      |   |    |           |        |            |           |            |   |          |
|---------|----------|------|---|----|-----------|--------|------------|-----------|------------|---|----------|
| DDB2    | 5.96E-05 | true |   | 11 | 47236492  | 24278  | rs2957873  | 47249294  | intronic   | Y | 2.04E-05 |
| LRRC36  | 6.27E-05 | true |   | 16 | 67360746  | 58364  | rs8047080  | 67402588  | intronic   | N | 3.13E-05 |
| -       | -        | -    | - | -  | -         | -      | rs11859352 | 67390448  | intronic   | Y | 3.76E-05 |
| -       | -        | -    | - | -  | -         | -      | rs4783754  | 67358816  | intronic   | N | 0.01607  |
| PPIEL   | 8.29E-05 | true |   | 1  | 39987951  | 37420  | rs4660293  | 40028180  | intronic   | Y | 2.65E-05 |
| -       | -        | -    | - | -  | -         | -      | rs3738676  | 39991588  | 3UTR       | N | 0.001231 |
| OR2W3   | 8.70E-05 | true |   | 1  | 248058888 | 946    | rs6695104  | 248060894 | downstream | Y | 3.90E-05 |
| -       | -        | -    | - | -  | -         | -      | rs11204546 | 248059712 | exonic     | N | 0.002048 |
| -       | -        | -    | - | -  | -         | -      | rs10888267 | 248059423 | exonic     | N | 0.005547 |
| RAPSN   | 8.99E-05 | true |   | 11 | 47459307  | 11424  | rs7126210  | 47460306  | exonic     | Y | 8.91E-05 |
| -       | -        | -    | - | -  | -         | -      | rs3824867  | 47468569  | intronic   | N | 1.85E-04 |
| -       | -        | -    | - | -  | -         | -      | -          | -         | -          | - | -        |
| INS     |          |      |   |    |           |        |            |           |            |   |          |
| No hits | -        | -    | - | -  | -         | -      | -          | -         | -          | - | -        |
| -       | -        | -    | - | -  | -         | -      | -          | -         | -          | - | -        |
| LDL     |          |      |   |    |           |        |            |           |            |   |          |
| PSRC1   | 4.32E-12 | true |   | 1  | 109822175 | 3616   | rs646776   | 109818530 | downstream | Y | 2.19E-12 |
| CELSR2  | 1.22E-11 | true |   | 1  | 109792640 | 25739  | rs646776   | 109818530 | downstream | Y | 2.19E-12 |
| -       | -        | -    | - | -  | -         | -      | rs611917   | 109815252 | intronic   | N | 2.49E-07 |
| -       | -        | -    | - | -  | -         | -      | rs4970833  | 109804646 | intronic   | N | 1.80E-04 |
| -       | -        | -    | - | -  | -         | -      | rs585362   | 109789795 | upstream   | N | 7.88E-04 |
| TOMM40  | 1.67E-07 | true |   | 19 | 45394476  | 12471  | rs157580   | 45395266  | intronic   | Y | 4.96E-08 |
| -       | -        | -    | - | -  | -         | -      | rs2075650  | 45395619  | intronic   | N | 1.05E-05 |
| PVRL2   | 3.47E-07 | true |   | 19 | 45349392  | 32807  | rs157580   | 45395266  | intronic   | Y | 4.96E-08 |
| -       | -        | -    | - | -  | -         | -      | rs2075650  | 45395619  | intronic   | N | 1.05E-05 |
| -       | -        | -    | - | -  | -         | -      | rs6859     | 45382034  | 3UTR       | N | 0.01207  |
| APOB    | 5.92E-07 | true |   | 2  | 21224300  | 42646  | rs1713222  | 21271323  | upstream   | Y | 9.33E-08 |
| -       | -        | -    | - | -  | -         | -      | rs673548   | 21237544  | intronic   | N | 2.28E-07 |
| -       | -        | -    | - | -  | -         | -      | rs676210   | 21231524  | exonic     | N | 2.60E-07 |
| -       | -        | -    | - | -  | -         | -      | rs1801701  | 21228827  | exonic     | N | 0.01127  |
| AR      | 9.83E-07 | true | X |    | 66788682  | 161780 | rs5031002  | 66942625  | intronic   | Y | 2.37E-07 |
| CR1L    | 1.63E-06 | true |   | 1  | 207818457 | 78580  | rs4844614  | 207875175 | intronic   | Y | 2.38E-07 |
| -       | -        | -    | - | -  | -         | -      | rs10494884 | 207847876 | intronic   | N | 0.004375 |

|         |          |      |   |    |          |        |            |                    |   |          |
|---------|----------|------|---|----|----------|--------|------------|--------------------|---|----------|
| -       | -        | -    | - | -  | -        | -      | rs12080578 | 207820612 intronic | N | 0.005604 |
| -       | -        | -    | - | -  | -        | -      | rs11118387 | 207867176 intronic | N | 0.006691 |
| -       | -        | -    | - | -  | -        | -      | rs10779339 | 207814451 3UTR     | N | 0.00726  |
| S1PR2   | 1.68E-06 | true | - | 19 | 10332108 | 9841   | rs10409243 | 10332988 3UTR      | Y | 6.23E-07 |
| -       | -        | -    | - | -  | -        | -      | rs2288937  | 10340912 intronic  | N | 0.009269 |
| MIR1908 | 4.04E-06 | true | - | 11 | 61582632 | 81     | rs174556   | 61580635 intronic  | Y | 4.04E-06 |
| FADS1   | 5.27E-06 | true | - | 11 | 61567096 | 17434  | rs174556   | 61580635 intronic  | Y | 4.04E-06 |
| -       | -        | -    | - | -  | -        | -      | rs174546   | 61569830 3UTR      | N | 6.38E-06 |
| FAM222B | 8.13E-06 | true | - | 17 | 27082995 | 86863  | rs9303621  | 27161138 intronic  | Y | 2.84E-06 |
| -       | -        | -    | - | -  | -        | -      | rs4795457  | 27087929 intronic  | N | 3.28E-06 |
| -       | -        | -    | - | -  | -        | -      | rs2043031  | 27085564 exonic    | N | 3.65E-06 |
| -       | -        | -    | - | -  | -        | -      | rs11658900 | 27095485 intronic  | N | 4.54E-04 |
| LDLR    | 1.41E-05 | true | - | 19 | 11200037 | 44469  | rs2228671  | 11210912 exonic    | Y | 2.34E-06 |
| IGSF5   | 1.48E-05 | true | - | 21 | 41117333 | 56691  | rs2837175  | 41131945 intronic  | Y | 9.66E-07 |
| -       | -        | -    | - | -  | -        | -      | rs2837227  | 41172166 intronic  | Y | 8.46E-05 |
| -       | -        | -    | - | -  | -        | -      | rs2837226  | 41167005 intronic  | N | 1.04E-04 |
| -       | -        | -    | - | -  | -        | -      | rs2837225  | 41165462 exonic    | N | 2.14E-04 |
| -       | -        | -    | - | -  | -        | -      | rs2837220  | 41160938 intronic  | N | 4.84E-04 |
| -       | -        | -    | - | -  | -        | -      | rs2837205  | 41146524 intronic  | N | 5.90E-04 |
| -       | -        | -    | - | -  | -        | -      | rs2837210  | 41148235 intronic  | N | 6.88E-04 |
| -       | -        | -    | - | -  | -        | -      | rs2837156  | 41126687 intronic  | N | 0.001538 |
| -       | -        | -    | - | -  | -        | -      | rs741867   | 41134055 intronic  | N | 0.04886  |
| FEN1    | 1.90E-05 | true | - | 11 | 61560108 | 4607   | rs102275   | 61557803 intronic  | Y | 6.51E-06 |
| MIR611  | 1.90E-05 | true | - | 11 | 61559966 | 68     | rs102275   | 61557803 intronic  | Y | 6.51E-06 |
| DNM2    | 1.94E-05 | true | - | 19 | 10828728 | 113859 | rs11881315 | 10909953 intronic  | Y | 3.05E-06 |
| -       | -        | -    | - | -  | -        | -      | rs3760781  | 10947522 upstream  | N | 2.90E-04 |
| TMEM258 | 1.95E-05 | true | - | 11 | 61556601 | 3485   | rs102275   | 61557803 intronic  | Y | 6.51E-06 |
| FADS2   | 3.13E-05 | true | - | 11 | 61583674 | 51153  | rs174556   | 61580635 intronic  | Y | 4.04E-06 |
| -       | -        | -    | - | -  | -        | -      | rs2072114  | 61605215 intronic  | N | 9.58E-05 |
| -       | -        | -    | - | -  | -        | -      | rs174570   | 61597212 intronic  | N | 5.24E-04 |
| -       | -        | -    | - | -  | -        | -      | rs2851682  | 61616012 intronic  | N | 8.62E-04 |
| -       | -        | -    | - | -  | -        | -      | rs174611   | 61627881 intronic  | N | 0.01518  |
| HMGCR   | 4.11E-05 | true | - | 5  | 74632992 | 24935  | rs3761740  | 74632133 upstream  | Y | 1.44E-05 |

|         |          |      |   |    |           |        |            |           |            |   |          |
|---------|----------|------|---|----|-----------|--------|------------|-----------|------------|---|----------|
| -       | -        | -    | - | -  | -         | -      | rs3846662  | 74651084  | intronic   | N | 1.11E-04 |
| MYRF    | 4.26E-05 | true | - | 11 | 61522860  | 33130  | rs102275   | 61557803  | intronic   | Y | 6.51E-06 |
| -       | -        | -    | - | -  | -         | -      | rs579383   | 61536583  | intronic   | N | 3.52E-04 |
| -       | -        | -    | - | -  | -         | -      | rs509360   | 61548559  | intronic   | N | 0.03373  |
| -       | -        | -    | - | -  | -         | -      | rs198475   | 61526071  | intronic   | N | 0.0428   |
| TDRG1   | 4.26E-05 | true | - | 6  | 40346162  | 1470   | rs4145199  | 40351841  | downstream | Y | 9.06E-06 |
| SBP     |          |      |   |    |           |        |            |           |            |   |          |
| SMEK2   | 6.58E-06 | true | - | 2  | 55774427  | 70434  | rs782602   | 55849309  | upstream   | Y | 8.02E-07 |
| -       | -        | -    | - | -  | -         | -      | rs782586   | 55836165  | intronic   | N | 1.20E-06 |
| -       | -        | -    | - | -  | -         | -      | rs782588   | 55841640  | intronic   | N | 1.23E-06 |
| -       | -        | -    | - | -  | -         | -      | rs10496050 | 55806313  | intronic   | N | 1.28E-05 |
| -       | -        | -    | - | -  | -         | -      | rs2291336  | 55845351  | upstream   | N | 1.21E-04 |
| -       | -        | -    | - | -  | -         | -      | rs12993624 | 55793476  | intronic   | N | 3.08E-04 |
| -       | -        | -    | - | -  | -         | -      | rs13010217 | 55806462  | intronic   | N | 5.40E-04 |
| -       | -        | -    | - | -  | -         | -      | rs6737995  | 55819752  | intronic   | N | 1.00E-03 |
| PCDHA12 | 1.39E-05 | true | - | 5  | 140254886 | 2589   | rs251373   | 140252615 | intronic   | Y | 2.32E-06 |
| -       | -        | -    | - | -  | -         | -      | rs3756325  | 140368859 | intronic   | N | 5.02E-04 |
| -       | -        | -    | - | -  | -         | -      | rs56003    | 140298532 | intronic   | N | 6.17E-04 |
| -       | -        | -    | - | -  | -         | -      | rs155818   | 140302162 | intronic   | N | 8.10E-04 |
| -       | -        | -    | - | -  | -         | -      | rs31874    | 140369318 | intronic   | N | 9.46E-04 |
| PCDHA8  | 1.42E-05 | true | - | 5  | 140220906 | 171024 | rs251373   | 140252615 | intronic   | Y | 2.32E-06 |
| -       | -        | -    | - | -  | -         | -      | rs251370   | 140246287 | intronic   | N | 2.84E-06 |
| -       | -        | -    | - | -  | -         | -      | rs3756325  | 140368859 | intronic   | N | 5.02E-04 |
| -       | -        | -    | - | -  | -         | -      | rs56003    | 140298532 | intronic   | N | 6.17E-04 |
| -       | -        | -    | - | -  | -         | -      | rs155818   | 140302162 | intronic   | N | 8.10E-04 |
| -       | -        | -    | - | -  | -         | -      | rs31874    | 140369318 | intronic   | N | 9.46E-04 |
| PCDHA9  | 1.42E-05 | true | - | 5  | 140227356 | 164574 | rs251373   | 140252615 | intronic   | Y | 2.32E-06 |
| -       | -        | -    | - | -  | -         | -      | rs251370   | 140246287 | intronic   | N | 2.84E-06 |
| -       | -        | -    | - | -  | -         | -      | rs3756325  | 140368859 | intronic   | N | 5.02E-04 |
| -       | -        | -    | - | -  | -         | -      | rs56003    | 140298532 | intronic   | N | 6.17E-04 |
| -       | -        | -    | - | -  | -         | -      | rs155818   | 140302162 | intronic   | N | 8.10E-04 |
| -       | -        | -    | - | -  | -         | -      | rs31874    | 140369318 | intronic   | N | 9.46E-04 |

|         |          |      |   |   |           |        |            |           |          |   |          |
|---------|----------|------|---|---|-----------|--------|------------|-----------|----------|---|----------|
| PCDHA10 | 1.42E-05 | true |   | 5 | 140235467 | 156463 | rs251373   | 140252615 | intronic | Y | 2.32E-06 |
| -       | -        | -    | - | - | -         | -      | rs251370   | 140246287 | intronic | N | 2.84E-06 |
| -       | -        | -    | - | - | -         | -      | rs3756325  | 140368859 | intronic | N | 5.02E-04 |
| -       | -        | -    | - | - | -         | -      | rs56003    | 140298532 | intronic | N | 6.17E-04 |
| -       | -        | -    | - | - | -         | -      | rs155818   | 140302162 | intronic | N | 8.10E-04 |
| -       | -        | -    | - | - | -         | -      | rs31874    | 140369318 | intronic | N | 9.46E-04 |
| PCDHA11 | 1.42E-05 | true |   | 5 | 140247097 | 4089   | rs251373   | 140252615 | intronic | Y | 2.32E-06 |
| -       | -        | -    | - | - | -         | -      | rs251370   | 140246287 | intronic | N | 2.84E-06 |
| -       | -        | -    | - | - | -         | -      | rs3756325  | 140368859 | intronic | N | 5.02E-04 |
| -       | -        | -    | - | - | -         | -      | rs56003    | 140298532 | intronic | N | 6.17E-04 |
| -       | -        | -    | - | - | -         | -      | rs155818   | 140302162 | intronic | N | 8.10E-04 |
| -       | -        | -    | - | - | -         | -      | rs31874    | 140369318 | intronic | N | 9.46E-04 |
| PCDHA6  | 1.59E-05 | true |   | 5 | 140207506 | 2583   | rs251373   | 140252615 | intronic | Y | 2.32E-06 |
| -       | -        | -    | - | - | -         | -      | rs251370   | 140246287 | intronic | N | 2.84E-06 |
| -       | -        | -    | - | - | -         | -      | rs10038174 | 140210616 | intronic | N | 2.64E-04 |
| -       | -        | -    | - | - | -         | -      | rs3756325  | 140368859 | intronic | N | 5.02E-04 |
| -       | -        | -    | - | - | -         | -      | rs56003    | 140298532 | intronic | N | 6.17E-04 |
| -       | -        | -    | - | - | -         | -      | rs155818   | 140302162 | intronic | N | 8.10E-04 |
| -       | -        | -    | - | - | -         | -      | rs31874    | 140369318 | intronic | N | 9.46E-04 |
| PCDHA7  | 1.59E-05 | true |   | 5 | 140213968 | 2371   | rs251373   | 140252615 | intronic | Y | 2.32E-06 |
| -       | -        | -    | - | - | -         | -      | rs251370   | 140246287 | intronic | N | 2.84E-06 |
| -       | -        | -    | - | - | -         | -      | rs10038174 | 140210616 | intronic | N | 2.64E-04 |
| -       | -        | -    | - | - | -         | -      | rs3756325  | 140368859 | intronic | N | 5.02E-04 |
| -       | -        | -    | - | - | -         | -      | rs56003    | 140298532 | intronic | N | 6.17E-04 |
| -       | -        | -    | - | - | -         | -      | rs155818   | 140302162 | intronic | N | 8.10E-04 |
| -       | -        | -    | - | - | -         | -      | rs31874    | 140369318 | intronic | N | 9.46E-04 |
| PCDHA5  | 1.67E-05 | true |   | 5 | 140201360 | 190570 | rs251373   | 140252615 | intronic | Y | 2.32E-06 |
| -       | -        | -    | - | - | -         | -      | rs251370   | 140246287 | intronic | N | 2.84E-06 |
| -       | -        | -    | - | - | -         | -      | rs10038174 | 140210616 | intronic | N | 2.64E-04 |
| -       | -        | -    | - | - | -         | -      | rs7732179  | 140199039 | intronic | N | 4.25E-04 |
| -       | -        | -    | - | - | -         | -      | rs3756325  | 140368859 | intronic | N | 5.02E-04 |
| -       | -        | -    | - | - | -         | -      | rs56003    | 140298532 | intronic | N | 6.17E-04 |
| -       | -        | -    | - | - | -         | -      | rs155818   | 140302162 | intronic | N | 8.10E-04 |

|        |          |      |   |   |           |        |            |           |          |   |          |
|--------|----------|------|---|---|-----------|--------|------------|-----------|----------|---|----------|
| -      | -        | -    | - | - | -         | -      | rs31874    | 140369318 | intronic | N | 9.46E-04 |
| PCDHA4 | 1.68E-05 | true | - | 5 | 140186658 | 205272 | rs251373   | 140252615 | intronic | Y | 2.32E-06 |
| -      | -        | -    | - | - | -         | -      | rs251370   | 140246287 | intronic | N | 2.84E-06 |
| -      | -        | -    | - | - | -         | -      | rs10038174 | 140210616 | intronic | N | 2.64E-04 |
| -      | -        | -    | - | - | -         | -      | rs1030166  | 140185473 | intronic | N | 2.69E-04 |
| -      | -        | -    | - | - | -         | -      | rs3822346  | 140187322 | exonic   | N | 3.23E-04 |
| -      | -        | -    | - | - | -         | -      | rs7732179  | 140199039 | intronic | N | 4.25E-04 |
| -      | -        | -    | - | - | -         | -      | rs3756325  | 140368859 | intronic | N | 5.02E-04 |
| -      | -        | -    | - | - | -         | -      | rs56003    | 140298532 | intronic | N | 6.17E-04 |
| -      | -        | -    | - | - | -         | -      | rs155818   | 140302162 | intronic | N | 8.10E-04 |
| -      | -        | -    | - | - | -         | -      | rs31874    | 140369318 | intronic | N | 9.46E-04 |
| PCDHA1 | 1.68E-05 | true | - | 5 | 140165720 | 226210 | rs251373   | 140252615 | intronic | Y | 2.32E-06 |
| -      | -        | -    | - | - | -         | -      | rs251370   | 140246287 | intronic | N | 2.84E-06 |
| -      | -        | -    | - | - | -         | -      | rs10038174 | 140210616 | intronic | N | 2.64E-04 |
| -      | -        | -    | - | - | -         | -      | rs1030166  | 140185473 | intronic | N | 2.69E-04 |
| -      | -        | -    | - | - | -         | -      | rs3822346  | 140187322 | exonic   | N | 3.23E-04 |
| -      | -        | -    | - | - | -         | -      | rs3756338  | 140180561 | intronic | N | 3.52E-04 |
| -      | -        | -    | - | - | -         | -      | rs7732179  | 140199039 | intronic | N | 4.25E-04 |
| -      | -        | -    | - | - | -         | -      | rs3756325  | 140368859 | intronic | N | 5.02E-04 |
| -      | -        | -    | - | - | -         | -      | rs56003    | 140298532 | intronic | N | 6.17E-04 |
| -      | -        | -    | - | - | -         | -      | rs155818   | 140302162 | intronic | N | 8.10E-04 |
| -      | -        | -    | - | - | -         | -      | rs31874    | 140369318 | intronic | N | 9.46E-04 |
| PCDHA3 | 1.68E-05 | true | - | 5 | 140180782 | 2476   | rs251373   | 140252615 | intronic | Y | 2.32E-06 |
| -      | -        | -    | - | - | -         | -      | rs251370   | 140246287 | intronic | N | 2.84E-06 |
| -      | -        | -    | - | - | -         | -      | rs10038174 | 140210616 | intronic | N | 2.64E-04 |
| -      | -        | -    | - | - | -         | -      | rs1030166  | 140185473 | intronic | N | 2.69E-04 |
| -      | -        | -    | - | - | -         | -      | rs3822346  | 140187322 | exonic   | N | 3.23E-04 |
| -      | -        | -    | - | - | -         | -      | rs3756338  | 140180561 | intronic | N | 3.52E-04 |
| -      | -        | -    | - | - | -         | -      | rs7732179  | 140199039 | intronic | N | 4.25E-04 |
| -      | -        | -    | - | - | -         | -      | rs3756325  | 140368859 | intronic | N | 5.02E-04 |
| -      | -        | -    | - | - | -         | -      | rs56003    | 140298532 | intronic | N | 6.17E-04 |
| -      | -        | -    | - | - | -         | -      | rs155818   | 140302162 | intronic | N | 8.10E-04 |
| -      | -        | -    | - | - | -         | -      | rs31874    | 140369318 | intronic | N | 9.46E-04 |

|        |          |      |   |   |           |       |            |                    |   |          |
|--------|----------|------|---|---|-----------|-------|------------|--------------------|---|----------|
| PCDHA2 | 1.68E-05 | true |   | 5 | 140174443 | 2620  | rs251373   | 140252615 intronic | Y | 2.32E-06 |
| -      | -        | -    | - | - | -         | -     | rs251370   | 140246287 intronic | N | 2.84E-06 |
| -      | -        | -    | - | - | -         | -     | rs10038174 | 140210616 intronic | N | 2.64E-04 |
| -      | -        | -    | - | - | -         | -     | rs1030166  | 140185473 intronic | N | 2.69E-04 |
| -      | -        | -    | - | - | -         | -     | rs3822346  | 140187322 exonic   | N | 3.23E-04 |
| -      | -        | -    | - | - | -         | -     | rs3756338  | 140180561 intronic | N | 3.52E-04 |
| -      | -        | -    | - | - | -         | -     | rs7732179  | 140199039 intronic | N | 4.25E-04 |
| -      | -        | -    | - | - | -         | -     | rs3756325  | 140368859 intronic | N | 5.02E-04 |
| -      | -        | -    | - | - | -         | -     | rs56003    | 140298532 intronic | N | 6.17E-04 |
| -      | -        | -    | - | - | -         | -     | rs155818   | 140302162 intronic | N | 8.10E-04 |
| -      | -        | -    | - | - | -         | -     | rs31874    | 140369318 intronic | N | 9.46E-04 |
| PNPT1  | 3.22E-05 | true |   | 2 | 55861197  | 59849 | rs782606   | 55886602 intronic  | Y | 5.82E-06 |
| -      | -        | -    | - | - | -         | -     | rs2586954  | 55892261 intronic  | N | 1.40E-05 |
| -      | -        | -    | - | - | -         | -     | rs782637   | 55894247 intronic  | N | 2.68E-05 |
| -      | -        | -    | - | - | -         | -     | rs2627775  | 55877113 intronic  | N | 1.91E-04 |
| -      | -        | -    | - | - | -         | -     | rs1822513  | 55903016 intronic  | N | 0.01665  |
| -      | -        | -    | - | - | -         | -     | -          | -                  | - | -        |
| TG     | -        | -    | - | - | -         | -     | -          | -                  | - | -        |
| GCKR   | 1.11E-09 | true |   | 2 | 27719705  | 26846 | rs1260326  | 27730940 exonic    | Y | 3.56E-10 |
| -      | -        | -    | - | - | -         | -     | rs780090   | 27718474 upstream  | N | 0.001157 |
| -      | -        | -    | - | - | -         | -     | rs780092   | 27743154 intronic  | N | 0.002774 |
| APOB   | 1.28E-07 | true |   | 2 | 21224300  | 42646 | rs673548   | 21237544 intronic  | Y | 2.01E-08 |
| -      | -        | -    | - | - | -         | -     | rs676210   | 21231524 exonic    | N | 3.36E-08 |



Table S14: Comparison results MGAS, TATES, and GATES when all analyses are conducted on the original 9 continuous metabolic phenotypes

(Method specific results in Supplemental Tables S9, S11, and S13)

| Overlapping MGAS/univariate GATES |
|-----------------------------------|
| APOB                              |
| AR                                |
| C16orf86                          |
| CELSR2                            |
| CETP                              |
| CR1L                              |
| CTCF                              |
| CTCFL                             |
| DNM2                              |
| DPEP2                             |
| DPEP3                             |
| EDC4                              |
| ENKD1                             |
| EXOC3L1                           |
| FADS1                             |
| FAM222B                           |
| FEN1                              |
| FHOD1                             |
| HAS3                              |
| HNF4A                             |
| HSF4                              |
| IGSF5                             |
| KIAA0895L                         |
| LDLR                              |
| LEPR                              |
| LRRC29                            |
| MADD                              |
| MIR1908                           |
| MIR611                            |

| Overlapping MGAS/TATES/Univariate GATES |
|-----------------------------------------|
| CRP                                     |
| C12orf43                                |
| CETP                                    |
| G6PC2                                   |
| GCKR                                    |
| HNF1A                                   |
| HNF1A-AS1                               |
| OASL                                    |

| Unique multivariate Gates |
|---------------------------|
| ASB18                     |
| ATP13A5                   |
| GLT8D1                    |
| GNL3                      |
| PTPRJ                     |
| SNORD19B                  |
| SNORD69                   |
| TBL2                      |
| ZNF101                    |

| Unique univariate Gates |
|-------------------------|
| DDB2                    |
| FADS2                   |
| HMGCR                   |
| KCTD19                  |
| LOC284801               |
| LRRC36                  |
| MYRF                    |
| OR2W3                   |
| PABPC4                  |
| PNPT1                   |
| PPIEL                   |
| PTPRJ                   |
| RAPSN                   |
| SLC9A5                  |
| SNORA55                 |
| TDRG1                   |

| Unique TATES             |
|--------------------------|
| HLA-DRB / HLA-DQB1       |
| MDFIC                    |
| LIPC / ALDH1A2 / RPL28P4 |

NFATC3  
NOL3  
NR1H3  
NRN1L  
NUTF2  
PARD6A  
PCDHA1  
PCDHA10  
PCDHA11  
PCDHA12  
PCDHA2  
PCDHA3  
PCDHA4  
PCDHA5  
PCDHA6  
PCDHA7  
PCDHA8  
PCDHA9  
PLA2G15  
PPP1R2P3  
PRMT7  
PSKH1  
PSRC1  
PVRL2  
S1PR2  
SMEK2  
TFAP2B  
TMEM208  
TMEM258  
TOMM40  
VPS4A
